# Supplementary material for: Direct radical alkylation and acylation of 2H-indazoles using substituted Hantzsch esters as radical reservoirs
Source: Royal Society of Chemistry journal article supplement (doi:10.1039/d0qo00507j), 2020-01-01

# Supporting Information

## Direct Radical Alkylation and Acylation of 2*H*-indazoles Using

### Substituted Hantzsch Esters as Radical Reservoirs

Li Liu,<sup>a</sup> Pengxing Jiang,<sup>a</sup> Yongguo Liu,<sup>b</sup> Hongguang Du,<sup>\*a</sup> and Jiajing Tan<sup>\*a</sup>

<sup>a</sup>Department of Organic Chemistry, College of Chemistry, Beijing University of Chemical Technology (BUCT), Beijing 100029, China. E-mail: dhg@mail.buct.edu.cn; tanjj@mail.buct.edu.cn.

<sup>b</sup>Beijing Key Laboratory of Flavour Chemistry, Beijing Technology and Business University (BTBU), Beijing 100048, China.

## *Contents*

|                                                                            |    |
|----------------------------------------------------------------------------|----|
| 1. General Methods .....                                                   | 3  |
| 2. General Procedure A for the Alkylation of 2 <i>H</i> -indazoles.....    | 6  |
| 3. General procedure B for the Acylation of 2 <i>H</i> -indazoles .....    | 7  |
| 4. Scale-up Synthesis .....                                                | 29 |
| 5. Synthesis of Bioactive Molecules .....                                  | 30 |
| 6. Control Experiment.....                                                 | 33 |
| 7. References .....                                                        | 34 |
| 8. <sup>1</sup> H NMR and <sup>13</sup> C NMR Spectra of the Products..... | 35 |

## 1. General Methods

All reactions were carried out in schlenk tubes. The reactions were monitored by thin-layer chromatography on silica gel 60-F254 coated 0.2 mm plates. Visualization was accomplished by UV light (254 nm). The crude products were purified by flash column chromatography using silica gel (normal phase, 200-300 mesh).  $^1\text{H}$  NMR spectra were recorded on a 400 MHz spectrometer at ambient temperature. Data were reported as follows: (1) chemical shift in parts per million ( $\delta$ , ppm) from  $\text{CDCl}_3$  (7.26 ppm),  $\text{DMSO-}d_6$  (2.50 ppm); (2) multiplicity (s = singlet, br = broad, d = doublet, t = triplet, q = quartet, and m = multiplet); (3) coupling constants (Hz).  $^{13}\text{C}$  NMR spectra were recorded on a 100 MHz spectrometer at ambient temperature. Chemical shifts were reported in ppm from  $\text{CDCl}_3$  (77.10 ppm),  $\text{DMSO-}d_6$  (39.52 ppm). Melting points were obtained on a melting point apparatus and the data are uncorrected. HR-MS analyses were carried out using a time-of-flight (TOF)-MS instrument with an electrospray ionization (ESI) source. All commercial materials were used as received unless otherwise noted.

## 1.1 Synthesis of 2*H*-indazoles

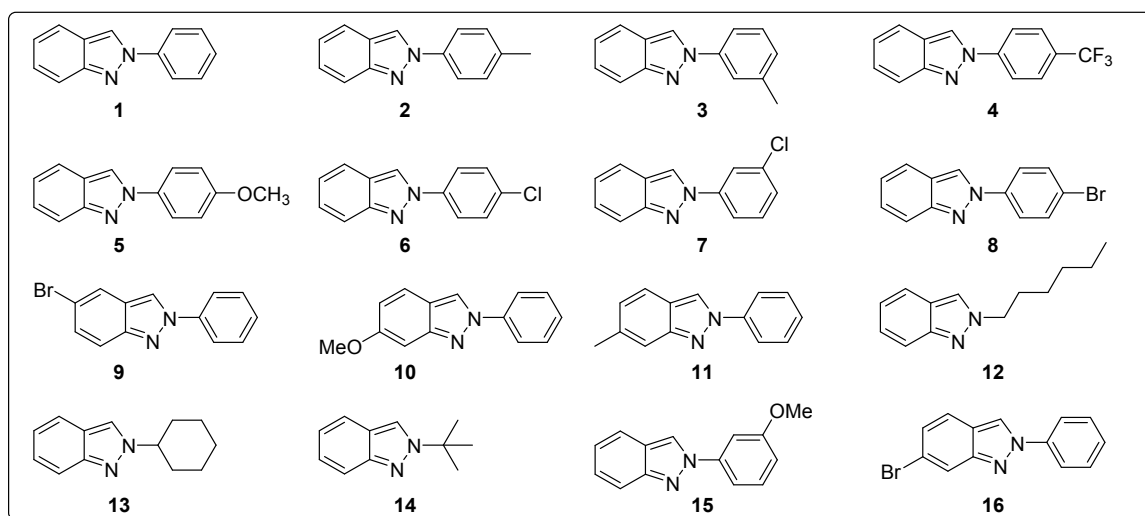

**Figure S1** 2*H*-indazoles used in this study

Compounds 1<sup>[1,2]</sup>, 2-8<sup>[2]</sup>, 9-11<sup>[1]</sup>, 12-14<sup>[2]</sup>, 15-16<sup>[1,2]</sup> were synthesized via reported procedures.

## 1.2 Synthesis of 1,4-Dihydropyridines

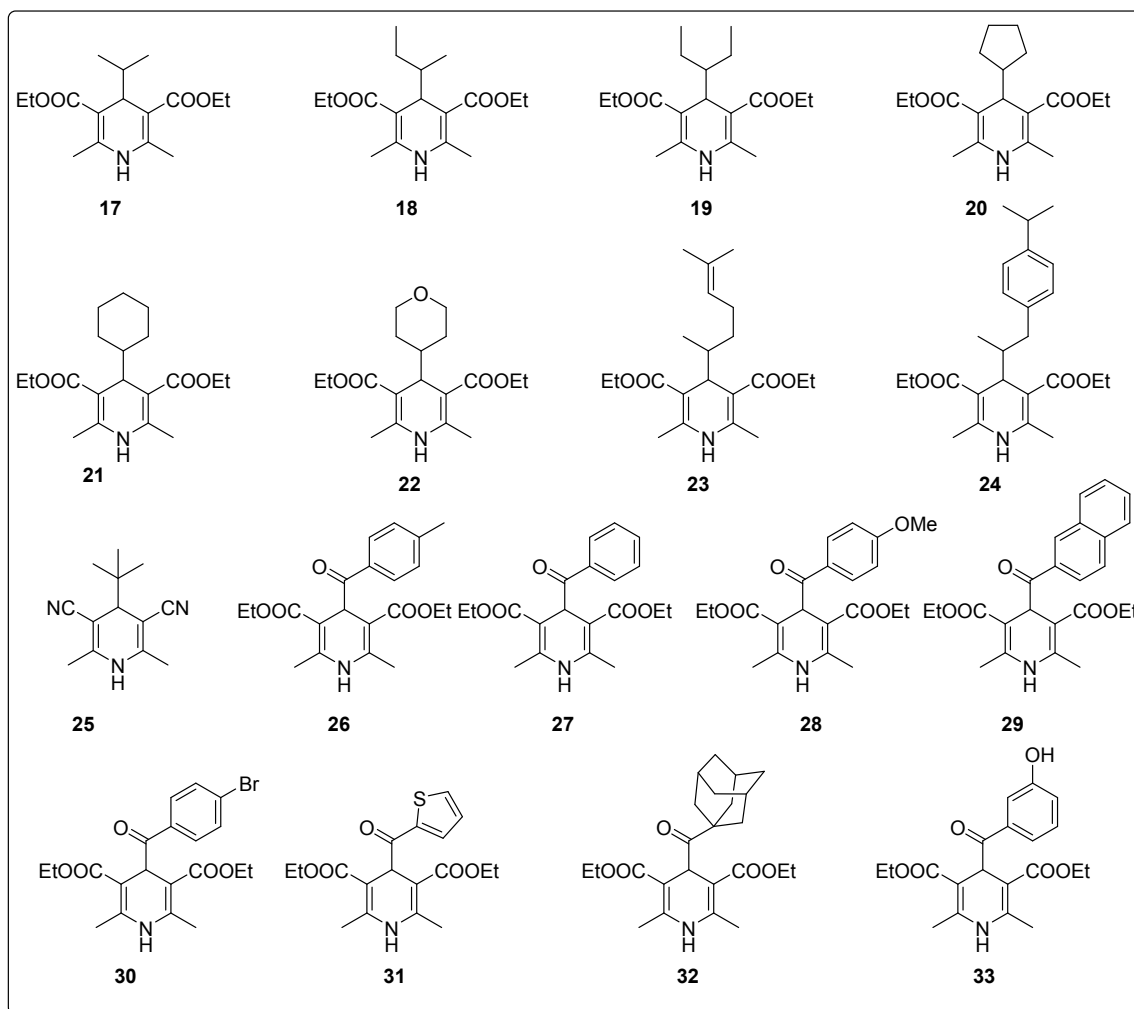

**Figure S2** Hantzsch esters used in this study

Compounds 17-19<sup>[3]</sup>, 20<sup>[5]</sup> 21-24<sup>[3]</sup>, 25<sup>[4]</sup>, 26-33<sup>[6]</sup> were synthesized via reported procedures.

Table S1. Optimization studies<sup>a</sup>

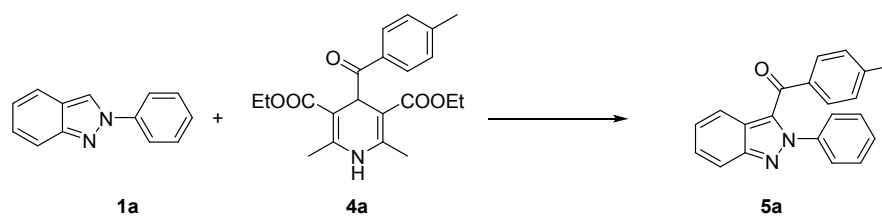

| Entry | Catalyst          | Oxidant                                       | Additive | Solvent                      | NMR yield <sup>b</sup> |
|-------|-------------------|-----------------------------------------------|----------|------------------------------|------------------------|
| 1     | AgNO <sub>3</sub> | Na <sub>2</sub> S <sub>2</sub> O <sub>8</sub> | TFA      | acetone:H <sub>2</sub> O=1:1 | 75%                    |

|                 |                   |                                                               |     |                                     |                         |
|-----------------|-------------------|---------------------------------------------------------------|-----|-------------------------------------|-------------------------|
| 2               | AgNO <sub>3</sub> | Na <sub>2</sub> S <sub>2</sub> O <sub>8</sub>                 | TFA | DMSO:H <sub>2</sub> O=1:1           | 45%                     |
| 3               | AgNO <sub>3</sub> | Na <sub>2</sub> S <sub>2</sub> O <sub>8</sub>                 | TFA | <i>i</i> -PrOH:H <sub>2</sub> O=1:1 | 61%                     |
| 4               | AgNO <sub>3</sub> | (NH <sub>4</sub> ) <sub>2</sub> S <sub>2</sub> O <sub>8</sub> | TFA | acetone:H <sub>2</sub> O=1:1        | 60%                     |
| 5               | AgNO <sub>3</sub> | K <sub>2</sub> S <sub>2</sub> O <sub>8</sub>                  | TFA | acetone:H <sub>2</sub> O=1:1        | 50%                     |
| 6 <sup>c</sup>  | AgNO <sub>3</sub> | Na <sub>2</sub> S <sub>2</sub> O <sub>8</sub>                 | TFA | acetone:H <sub>2</sub> O=1:1        | 54%                     |
| 7 <sup>d</sup>  | AgNO <sub>3</sub> | Na <sub>2</sub> S <sub>2</sub> O <sub>8</sub>                 | TFA | acetone:H <sub>2</sub> O=1:1        | 55%                     |
| 8 <sup>e</sup>  | AgNO <sub>3</sub> | Na <sub>2</sub> S <sub>2</sub> O <sub>8</sub>                 | TFA | acetone:H <sub>2</sub> O=1:1        | 68%                     |
| 9 <sup>f</sup>  | AgNO <sub>3</sub> | Na <sub>2</sub> S <sub>2</sub> O <sub>8</sub>                 | TFA | acetone:H <sub>2</sub> O=1:1        | 85%                     |
| 10 <sup>g</sup> | AgNO <sub>3</sub> | Na <sub>2</sub> S <sub>2</sub> O <sub>8</sub>                 | TFA | acetone:H <sub>2</sub> O=1:1        | 79%                     |
| 11 <sup>h</sup> | AgNO <sub>3</sub> | Na <sub>2</sub> S <sub>2</sub> O <sub>8</sub>                 | TFA | acetone:H <sub>2</sub> O=1:1        | 82%                     |
| 12 <sup>i</sup> | AgNO <sub>3</sub> | Na <sub>2</sub> S <sub>2</sub> O <sub>8</sub>                 | TFA | acetone:H <sub>2</sub> O=1:1        | 56%                     |
| 13 <sup>j</sup> | AgNO <sub>3</sub> | Na <sub>2</sub> S <sub>2</sub> O <sub>8</sub>                 | TFA | acetone:H <sub>2</sub> O=1:1        | 88%( 87% <sup>k</sup> ) |

<sup>a</sup>Reaction conditions: **1a** (0.10 mmol), **4a** (0.30 mmol), catalyst (0.03 mmol), oxidant (0.30 mmol) and acid (0.30 mmol) in solvents (v/v = 1:1, 0.1 M) were stirred under N<sub>2</sub> atmosphere for 10 h, RT. <sup>b</sup>Yield was determined by <sup>1</sup>H NMR. <sup>c</sup>1 equiv. Na<sub>2</sub>S<sub>2</sub>O<sub>8</sub> used. <sup>d</sup>2 equiv. Na<sub>2</sub>S<sub>2</sub>O<sub>8</sub> used. <sup>e</sup>4 equiv. Na<sub>2</sub>S<sub>2</sub>O<sub>8</sub> used. <sup>f</sup>25 °C, 4 h. <sup>g</sup>30 °C, 4 h. <sup>h</sup>40 °C, 4 h. <sup>i</sup>80 °C, 4 h. <sup>j</sup>0.4 equiv. AgNO<sub>3</sub> used, 25 °C, 4 h. <sup>k</sup>Isolated yields.

## 2. General Procedure A for the Alkylation of 2H-indazoles

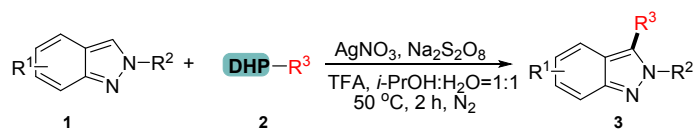

The reaction vessel was charged with 2H-indazole (**1a**, 0.2 mmol, 39 mg), alkyl-DHP reagent (**2a**, 0.6 mmol, 177 mg), Na<sub>2</sub>S<sub>2</sub>O<sub>8</sub> (3.0 equiv., 143 mg), AgNO<sub>3</sub> (30 mol%, 10 mg) and TFA (2.0 equiv., 46 mg) in *i*-PrOH/H<sub>2</sub>O (1:1, 4 mL), and the reaction mixture was stirred under nitrogen atmosphere at room temperature for 2 h.

After completion, the reaction mixture was quenched with 20 mL water/ethyl acetate (1:1). Then the reaction mixture was extracted with ethyl acetate and the organic phase was washed with brine, dried over anhydrous Na<sub>2</sub>SO<sub>4</sub>. After evaporating the solvent under reduced pressure, the crude product was purified by column chromatography using petroleum ether/ethyl acetate as the eluents.

When the diethyl 2,6-dimethylpyridine-3,5-dicarboxylate byproduct had a R<sub>f</sub> similar to that of products **3**, the pyridine was removed by dissolving the crude product in methyl tert-butyl ether (10 mL) and washing the organic layer with HCl (1 mL) prior to purification by column chromatography.

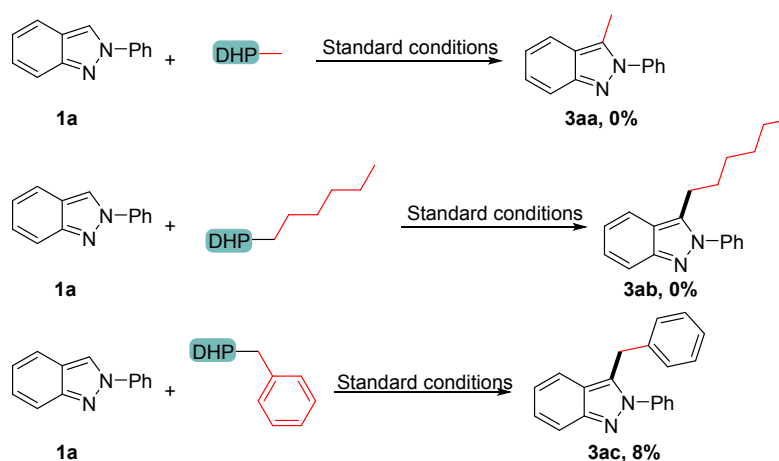

**Figure S3** Alkylation of 2*H*-indazoles by 4- primary alkylated DHPs

Unfortunately, primary alkyl radicals did not deliver the expected product because the corresponding DHP does not undergo homolytic C-C cleavage but rather C-H homolysis, resulting in the formation of a 4-alkylated pyridine byproduct (**3aa-3ab**). When 4-benzyl-DHP was used, the produce of **3ac** was low in 8% yield.

### 3. General procedure B for the Acylation of 2H-indazoles

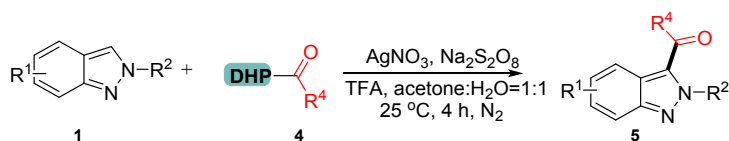

The reaction vessel was charged with 2H-indazole (**1a**, 0.2 mmol, 39 mg), acyl-DHP reagent (**4a**, 0.6 mmol, 222 mg), Na<sub>2</sub>S<sub>2</sub>O<sub>8</sub> (3.0 equiv., 143 mg), AgNO<sub>3</sub> (40 mol%, 14 mg) and TFA (3.0 equiv., 68 mg) in acetone/H<sub>2</sub>O (1:1, 4 mL), and the reaction mixture was stirred under nitrogen atmosphere at 25 °C for 4 h. After completion, the reaction mixture was quenched with 20 mL water/ethyl acetate (1:1). Then the reaction mixture was extracted with ethyl acetate and the organic phase was washed with brine, dried over anhydrous Na<sub>2</sub>SO<sub>4</sub>. After evaporating the solvent under reduced pressure, the crude product was purified by column chromatography using petroleum ether/ethyl acetate as the eluents.

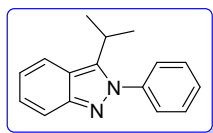

#### 3-isopropyl-2-phenyl-2H-indazole (**3a**)

Following the general procedure A, the crude product was purified by silica gel flash chromatography (PE: EA=20:1 as the eluent) to give **3a** (43 mg, 92% yield) as a yellow solid. Compound is known.

**<sup>1</sup>H NMR** (400 MHz, CDCl<sub>3</sub>)  $\delta$  7.84 (d,  $J$  = 8.5 Hz, 1H), 7.71 (d,  $J$  = 8.8 Hz, 1H), 7.55-7.47 (m, 5H), 7.30 (ddd,  $J$  = 8.7, 6.6, 0.9 Hz, 1H), 7.05 (ddd,  $J$  = 8.5, 6.6, 0.7 Hz, 1H), 3.36 (hept,  $J$  = 7.1 Hz, 1H), 1.48 (d,  $J$  = 7.1 Hz, 6H).

**<sup>13</sup>C NMR** (100 MHz, CDCl<sub>3</sub>)  $\delta$  148.9, 142.0, 140.2, 129.2, 129.1, 126.5, 126.4, 121.0, 120.7, 119.2, 117.9, 27.1, 22.5.



**HRMS (ESI):** Calcd for  $C_{16}H_{17}N_2^+ [M+H]^+$  237.1386, found 237.1380.

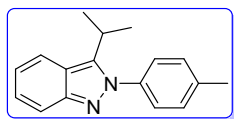

### **3-isopropyl-2-(p-tolyl)-2H-indazole (3b)**

Following the general procedure A, the crude product was purified by silica gel flash chromatography (PE: EA=15:1 as the eluent) to give **3b** (39 mg, 78% yield) as a yellow solid. New compounds.

**$^1H$  NMR** (400 MHz,  $CDCl_3$ )  $\delta$  7.83 (d,  $J = 8.5$  Hz, 1H), 7.71 (d,  $J = 8.7$  Hz, 1H), 7.36-7.26 (m, 5H), 7.05-7.01 (m, 1H), 3.35 (hept,  $J = 7.0$  Hz, 1H), 2.45 (s, 3H), 1.47 (d,  $J = 7.0$  Hz, 6H).

**$^{13}C$  NMR** (100 MHz,  $CDCl_3$ )  $\delta$  148.8, 141.9, 139.1, 137.6, 129.7, 126.6, 120.9, 120.5, 119.0, 117.8, 27.1, 22.4, 21.2.

**HRMS (ESI):** Calcd for  $C_{17}H_{19}N_2^+ [M+H]^+$  251.1543, found 251.1435.

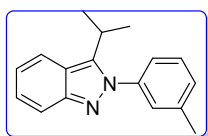

### **3-isopropyl-2-(m-tolyl)-2H-indazole (3c)**

Following the general procedure A, the crude product was purified by silica gel flash chromatography (PE: EA=15:1 as the eluent) to give **3c** (44 mg, 89% yield) as a yellow solid. New compounds.

**$^1H$  NMR** (400 MHz,  $CDCl_3$ )  $\delta$  7.83 (d,  $J = 8.5$  Hz, 1H), 7.71 (d,  $J = 8.7$  Hz, 1H), 7.40 (t,  $J = 7.6$  Hz, 1H), 7.32-7.24 (m, 4H), 7.06-7.02 (m, 1H), 3.37 (hept,  $J = 7.0$  Hz, 1H),

2.44 (s, 3H), 1.48 (d,  $J = 7.0$  Hz, 6H).

$^{13}\text{C}$  NMR (100 MHz,  $\text{CDCl}_3$ )  $\delta$  148.8, 141.8, 140.0, 139.4, 129.8, 128.8, 127.1, 126.2, 123.4, 120.9, 120.5, 119.1, 117.8, 27.1, 22.5, 21.3.

**HRMS (ESI):** Calcd for  $\text{C}_{17}\text{H}_{19}\text{N}_2^+$   $[\text{M}+\text{H}]^+$  251.1543, found 251.1436.

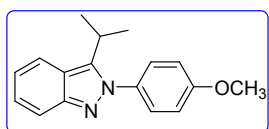

### 3-isopropyl-2-(4-methoxyphenyl)-2H-indazole (3d)

Following the general procedure A, the crude product was purified by silica gel flash chromatography (PE: EA=15:1 as the eluent) to give **3d** (50 mg, 95% yield) as a yellow solid. New compounds.

$^1\text{H}$  NMR (400 MHz,  $\text{CDCl}_3$ )  $\delta$  7.86 (d,  $J = 8.5$  Hz, 1H), 7.74 (d,  $J = 8.8$  Hz, 1H), 7.44-7.40 (m, 2H), 7.32 (ddd,  $J = 8.7, 6.6, 0.9$  Hz, 1H), 7.09-7.03 (m, 3H), 3.91 (s, 3H), 3.36 (hept,  $J = 7.1$  Hz, 1H), 1.50 (d,  $J = 7.1$  Hz, 6H).

$^{13}\text{C}$  NMR (100 MHz,  $\text{CDCl}_3$ )  $\delta$  160.0, 148.7, 142.1, 133.1, 127.6, 126.2, 120.9, 120.5, 119.0, 117.8, 114.2, 55.6, 27.1, 22.4.

**HRMS (ESI):** Calcd for  $\text{C}_{17}\text{H}_{19}\text{N}_2\text{O}^+$   $[\text{M}+\text{H}]^+$  267.1492, found 267.1488.

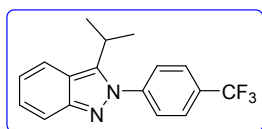

### 3-isopropyl-2-(4-(trifluoromethyl)phenyl)-2H-indazole (3e)

Following the general procedure A, the crude product was purified by silica gel flash

chromatography (PE: EA=15:1 as the eluent) to give **3e** (28 mg, 47% yield) as a yellow solid. New compounds.

**<sup>1</sup>H NMR** (400 MHz, CDCl<sub>3</sub>)  $\delta$  7.85-7.81 (m, 3H), 7.71 (d,  $J$  = 8.8 Hz, 1H), 7.65 (d,  $J$  = 8.2 Hz, 2H), 7.32 (ddd,  $J$  = 8.8, 6.6, 0.9 Hz, 1H), 7.07 (ddd,  $J$  = 8.5, 6.6, 0.8 Hz, 1H), 3.37 (hept,  $J$  = 7.0 Hz, 1H), 1.51 (d,  $J$  = 7.0 Hz, 6H).

**<sup>13</sup>C NMR** (100 MHz, CDCl<sub>3</sub>)  $\delta$  149.3, 143.1, 142.1, 131.2(q,  $J$  = 32.8 Hz, 1C), 127.0, 126.9, 126.5(q,  $J$  = 3.7 Hz, 1C), 123.8(q,  $J$  = 270.8 Hz, 1C), 121.1, 121.0, 119.5, 118.0, 27.2, 22.6.

**HRMS (ESI)**: Calcd for C<sub>17</sub>H<sub>16</sub>F<sub>3</sub>N<sub>2</sub><sup>+</sup> [M+H]<sup>+</sup> 305.1260, found 305.1259.

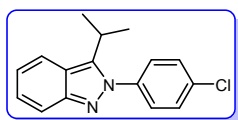

### **2-(4-chlorophenyl)-3-isopropyl-2H-indazole (3f)**

Following the general procedure A, the crude product was purified by silica gel flash chromatography (PE: EA=15:1 as the eluent) to give **3f** (37 mg, 70% yield) as a yellow solid. New compounds.

**<sup>1</sup>H NMR** (400 MHz, CDCl<sub>3</sub>)  $\delta$  7.82 (d,  $J$  = 8.6 Hz, 1H), 7.70 (d,  $J$  = 8.8 Hz, 1H), 7.53-7.49 (m, 2H), 7.44-7.41 (m, 2H), 7.30 (ddd,  $J$  = 8.7, 6.6, 0.9 Hz, 1H), 7.05 (ddd,  $J$  = 8.4, 6.6, 0.8 Hz, 1H), 3.33 (hept,  $J$  = 7.0 Hz, 1H), 1.48 (d,  $J$  = 7.0 Hz, 6H).

**<sup>13</sup>C NMR** (100 MHz, CDCl<sub>3</sub>)  $\delta$  149.0, 142.0, 138.6, 135.0, 129.3, 127.7, 126.6, 120.9, 120.8, 119.2, 117.8, 27.1, 22.4.

**HRMS (ESI)**: Calcd for C<sub>16</sub>H<sub>16</sub>ClN<sub>2</sub><sup>+</sup> [M+H]<sup>+</sup> 271.0997, found 271.0994.

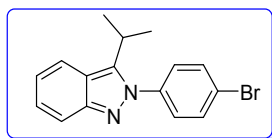

### 2-(4-bromophenyl)-3-isopropyl-2H-indazole (**3g**)

Following the general procedure A, the crude product was purified by silica gel flash chromatography (PE: EA=15:1 as the eluent) to give **3g** (44 mg, 71% yield) as a yellow solid. New compounds.

**<sup>1</sup>H NMR** (400 MHz, CDCl<sub>3</sub>)  $\delta$  7.82 (d,  $J$  = 8.6 Hz, 1H), 7.70 (d,  $J$  = 8.8 Hz, 1H), 7.66 (d,  $J$  = 8.5 Hz, 2H), 7.37 (d,  $J$  = 8.5 Hz, 2H), 7.32 -7.28 (m, 1H), 7.07-7.03 (m, 1H), 3.33 (hept,  $J$  = 7.0 Hz, 1H), 1.48 (d,  $J$  = 7.0 Hz, 6H).

**<sup>13</sup>C NMR** (100 MHz, CDCl<sub>3</sub>)  $\delta$  149.0, 142.0, 139.1, 132.3, 128.0, 126.6, 123.0, 120.9, 120.9, 119.2, 117.8, 27.1, 22.5.

**HRMS (ESI)**: Calcd for C<sub>16</sub>H<sub>16</sub>BrN<sub>2</sub><sup>+</sup> [M+H]<sup>+</sup> 315.0491, found 315.0484.

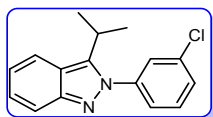

### 2-(3-chlorophenyl)-3-isopropyl-2H-indazole (**3h**)

Following the general procedure A, the crude product was purified by silica gel flash chromatography (PE: EA=15:1 as the eluent) to give **3h** (36 mg, 67% yield) as a yellow solid. New compounds.

**<sup>1</sup>H NMR** (400 MHz, CDCl<sub>3</sub>)  $\delta$  7.83 (d,  $J$  = 8.6 Hz, 1H), 7.70 (d,  $J$  = 8.8 Hz, 1H), 7.53-7.44 (m, 3H), 7.38 (dt,  $J$  = 6.9, 1.9 Hz, 1H), 7.31 (ddd,  $J$  = 8.7, 6.6, 1.0 Hz, 1H), 7.06 (ddd,  $J$  = 8.5, 6.6, 0.8 Hz, 1H), 3.36 (hept,  $J$  = 7.0 Hz, 1H), 1.50 (d,  $J$  = 7.0 Hz, 6H).

$^{13}\text{C}$  NMR (100 MHz,  $\text{CDCl}_3$ )  $\delta$  149.0, 142.0, 141.1, 134.9, 130.1, 129.2, 126.9, 126.7, 124.6, 120.9, 120.9, 119.2, 117.9, 27.1, 22.5.

**HRMS (ESI):** Calcd for  $\text{C}_{16}\text{H}_{16}\text{ClN}_2^+$   $[\text{M}+\text{H}]^+$  271.0997, found 271.0994.

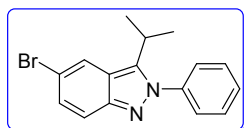

### 5-bromo-3-isopropyl-2-phenyl-2H-indazole (3i)

Following the general procedure A, the crude product was purified by silica gel flash chromatography (PE: EA=15:1 as the eluent) to give **3i** (40 mg, 64% yield) as a yellow solid. New compounds.

$^1\text{H}$  NMR (400 MHz,  $\text{CDCl}_3$ )  $\delta$  7.98 (d,  $J = 1.2$  Hz, 1H), 7.60-7.45(m, 6H), 7.34 (dd,  $J = 9.1, 1.8$  Hz, 1H), 3.33 (hept,  $J = 7.0$  Hz, 1H), 1.45 (d,  $J = 7.1$  Hz, 6H).

$^{13}\text{C}$  NMR (100 MHz,  $\text{CDCl}_3$ )  $\delta$  147.3, 141.7, 139.8, 130.0, 129.3, 129.3, 126.4, 123.0, 120.3, 119.7, 114.0, 27.1, 22.5.

**HRMS (ESI):** Calcd for  $\text{C}_{16}\text{H}_{16}\text{BrN}_2^+$   $[\text{M}+\text{H}]^+$  315.0491, found 315.0490.

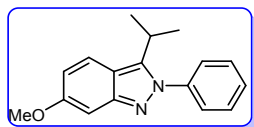

### 3-isopropyl-6-methoxy-2-phenyl-2H-indazole(3j)

Following the general procedure A, the crude product was purified by silica gel flash chromatography (PE: EA=15:1 as the eluent) to give **3j** (37 mg, 71% yield) as a yellow solid. New compounds.

**<sup>1</sup>H NMR** (400 MHz, CDCl<sub>3</sub>) δ 7.69 (d, *J* = 9.2 Hz, 1H), 7.53-7.46 (m, 5H), 6.95 (d, *J* = 1.8 Hz, 1H), 6.75 (dd, *J* = 9.2, 2.1 Hz, 1H), 3.87 (s, 3H), 3.32 (hept, *J* = 7.0 Hz, 1H), 1.45 (d, *J* = 7.0 Hz, 6H).

**<sup>13</sup>C NMR** (100 MHz, CDCl<sub>3</sub>) δ 159.0, 150.0, 142.2, 140.2, 129.1, 128.8, 126.5, 121.8, 115.7, 114.9, 94.6, 55.3, 27.0, 22.5.

**HRMS (ESI):** Calcd for C<sub>17</sub>H<sub>19</sub>N<sub>2</sub>O<sup>+</sup> [M+H]<sup>+</sup> 267.1492, found 267.1483.

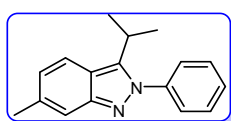

### 3-isopropyl-6-methyl-2-phenyl-2H-indazole(3k)

Following the general procedure A, the crude product was purified by silica gel flash chromatography (PE: EA=15:1 as the eluent) to give **3k** (49 mg, 99% yield) as a yellow solid. New compounds.

**<sup>1</sup>H NMR** (400 MHz, CDCl<sub>3</sub>) δ 7.72 (d, *J* = 8.7 Hz, 1H), 7.54-7.45 (m, 6H), 6.89 (dd, *J* = 8.7, 0.8 Hz, 1H), 3.33 (hept, *J* = 7.0 Hz, 1H), 2.45 (s, 3H), 1.46 (d, *J* = 7.0 Hz, 6H).

**<sup>13</sup>C NMR** (100 MHz, CDCl<sub>3</sub>) δ 149.5, 141.8, 140.2, 136.2, 129.1, 128.9, 126.5, 123.5, 120.4, 117.5, 116.1, 27.0, 22.5, 22.1.

**HRMS (ESI):** Calcd for C<sub>17</sub>H<sub>19</sub>N<sub>2</sub><sup>+</sup> [M+H]<sup>+</sup> 251.1543, found 251.1535.

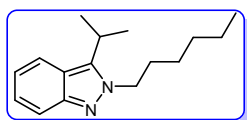

### 2-hexyl-3-isopropyl-2H-indazole(3l)

Following the general procedure A, the crude product was purified by silica gel flash

chromatography (PE: EA=15:1 as the eluent) to give **3l** (22 mg, 45% yield) as a yellow oil. New compounds.

**<sup>1</sup>H NMR** (400 MHz, CDCl<sub>3</sub>) δ 7.75 (d, *J* = 8.5 Hz, 1H), 7.64 (d, *J* = 8.7 Hz, 1H), 7.24-7.20 (m, 1H), 6.97 (dd, *J* = 8.0, 7.1 Hz, 1H), 4.35 (t, *J* = 7.5 Hz, 2H), 3.42 (hept, *J* = 7.0 Hz, 1H), 1.97-1.89 (m, 2H), 1.52 (d, *J* = 7.0 Hz, 6H), 1.38-1.28 (m, 6H), 0.88 (t, *J* = 6.9 Hz, 3H).

**<sup>13</sup>C NMR** (100 MHz, CDCl<sub>3</sub>) δ 148.0, 140.1, 125.5, 120.7, 119.9, 119.0, 117.4, 50.8, 31.5, 31.1, 27.0, 26.6, 22.5, 22.4, 14.0.

**HRMS (ESI):** Calcd for C<sub>16</sub>H<sub>25</sub>N<sub>2</sub><sup>+</sup> [M+H]<sup>+</sup> 245.2012, found 245.2006.

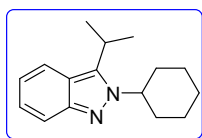

### 2-cyclohexyl-3-isopropyl-2H-indazole (**3m**)

Following the general procedure A, the crude product was purified by silica gel flash chromatography (PE: EA=15:1 as the eluent) to give **3m** (20 mg, 42% yield) as a yellow solid. New compounds.

**<sup>1</sup>H NMR** (400 MHz, CDCl<sub>3</sub>) δ 7.75 (d, *J* = 8.5 Hz, 1H), 7.68 (d, *J* = 8.7 Hz, 1H), 7.21 (ddd, *J* = 8.7, 6.6, 1.0 Hz, 1H), 6.97 (ddd, *J* = 8.4, 6.6, 0.8 Hz, 1H), 4.35 (tt, *J* = 11.7, 3.7 Hz, 1H), 3.49 (hept, *J* = 7.0 Hz, 1H), 2.25-2.14 (m, 2H), 1.99-1.94 (m, 4H), 1.80-1.75 (m, 1H), 1.52 (d, *J* = 7.1 Hz, 6H), 1.48-1.34 (m, 3H).

**<sup>13</sup>C NMR** (100 MHz, CDCl<sub>3</sub>) δ 147.8, 139.3, 125.2, 120.8, 119.9, 118.8, 117.5, 59.0, 33.6, 26.7, 25.9, 25.2, 22.5.

**HRMS (ESI):** Calcd for C<sub>16</sub>H<sub>23</sub>N<sub>2</sub><sup>+</sup> [M+H]<sup>+</sup> 243.1856, found 243.1855.

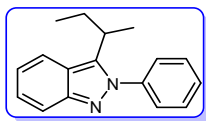

### 3-(sec-butyl)-2-phenyl-2H-indazole (**3n**)

Following the general procedure A, the crude product was purified by silica gel flash chromatography (PE: EA=15:1 as the eluent) to give **3n** (21 mg, 43% yield) as a yellow oil. New compounds.

$^1\text{H NMR}$  (400 MHz,  $\text{CDCl}_3$ )  $\delta$  7.79 (d,  $J = 8.5$  Hz, 1H), 7.72 (d,  $J = 8.8$  Hz, 1H), 7.55-7.45 (m, 5H), 7.32-7.28 (m, 1H), 7.04 (dd,  $J = 7.9, 7.1$  Hz, 1H), 3.13-3.03 (m, 1H), 2.03-1.92 (m, 1H), 1.85-1.74 (m, 1H), 1.46 (d,  $J = 7.1$  Hz, 3H), 0.76 (t,  $J = 7.4$  Hz, 3H).

$^{13}\text{C NMR}$  (100 MHz,  $\text{CDCl}_3$ )  $\delta$  148.9, 141.2, 140.2, 129.1, 129.1, 126.8, 126.4, 120.9, 120.6, 119.1, 117.9, 34.2, 29.8, 20.6, 12.5.

**HRMS (ESI)**: Calcd for  $\text{C}_{17}\text{H}_{19}\text{N}_2^+$   $[\text{M}+\text{H}]^+$  251.1543, found 251.1546.

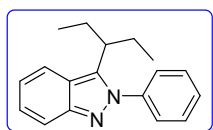

### 3-(pentan-3-yl)-2-phenyl-2H-indazole (**3o**)

Following the general procedure A, the crude product was purified by silica gel flash chromatography (PE: EA=15:1 as the eluent) to give **3o** (33 mg, 62% yield) as a yellow solid. New compounds.

$^1\text{H NMR}$  (400 MHz,  $\text{CDCl}_3$ )  $\delta$  7.77 (d,  $J = 8.5$  Hz, 1H), 7.72 (d,  $J = 8.8$  Hz, 1H), 7.54-7.44 (m, 5H), 7.30 (ddd,  $J = 8.7, 6.6, 0.9$  Hz, 1H), 7.03 (ddd,  $J = 8.4, 6.6, 0.7$  Hz,



1H), 2.92-2.84 (m, 1H), 2.00-1.78 (m, 4H), 0.77 (t,  $J = 7.4$  Hz, 6H).

$^{13}\text{C}$  NMR (100 MHz,  $\text{CDCl}_3$ )  $\delta$  148.9, 140.3, 140.2, 129.1, 129.0, 127.3, 126.4, 120.9, 120.6, 119.1, 117.9, 41.5, 28.2, 12.6.

**HRMS (ESI):** Calcd for  $\text{C}_{18}\text{H}_{21}\text{N}_2^+$   $[\text{M}+\text{H}]^+$  265.1699, found 265.1691.

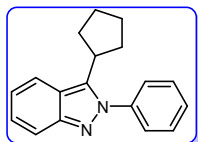

### 3-cyclopentyl-2-phenyl-2H-indazole (3p)

Following the general procedure A, the crude product was purified by silica gel flash chromatography (PE: EA=15:1 as the eluent) to give **3p** (42 mg, 81% yield) as a yellow oil. New compounds.

$^1\text{H}$  NMR (400 MHz,  $\text{CDCl}_3$ )  $\delta$  7.75 (d,  $J = 8.6$  Hz, 1H), 7.71 (d,  $J = 8.8$  Hz, 1H), 7.55-7.48 (m, 5H), 7.31-7.28 (m, 1H), 7.06-7.02 (m, 1H), 3.36 (p,  $J = 9.1$  Hz, 1H), 2.12-2.07 (m, 4H), 2.00-1.90 (m, 2H), 1.74-1.67 (m, 2H).

$^{13}\text{C}$  NMR (100 MHz,  $\text{CDCl}_3$ )  $\delta$  149.0, 140.5, 140.3, 129.2, 128.9, 126.5, 126.4, 120.8, 120.6, 119.0, 118.0, 37.7, 33.5, 26.4.

**HRMS (ESI):** Calcd for  $\text{C}_{18}\text{H}_{19}\text{N}_2^+$   $[\text{M}+\text{H}]^+$  263.1543, found 263.1534.

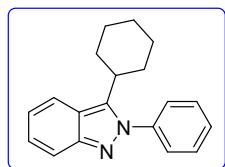

### 3-cyclohexyl-2-phenyl-2H-indazole (3q)

Following the general procedure A, the crude product was purified by silica gel flash chromatography (PE: EA=15:1 as the eluent) to give **3q** (41 mg, 74% yield) as a white solid. Compound is known.

**<sup>1</sup>H NMR** (400 MHz, CDCl<sub>3</sub>)  $\delta$  7.86 (d,  $J$  = 8.6 Hz, 1H), 7.71 (d,  $J$  = 8.7 Hz, 1H), 7.54-7.45 (m, 5H), 7.30-7.26 (m, 1H), 7.03 (dd,  $J$  = 8.1, 7.1 Hz, 1H), 2.97 (tt,  $J$  = 11.6, 4.3 Hz, 1H), 2.03-1.90 (m, 4H), 1.85-1.82 (m, 2H), 1.76-1.73 (m, 1H), 1.41-1.19 (m, 3H).

**<sup>13</sup>C NMR** (100 MHz, CDCl<sub>3</sub>)  $\delta$  148.9, 141.1, 140.2, 129.1, 128.9, 126.4, 126.3, 121.2, 120.5, 119.5, 117.8, 37.3, 32.6, 26.6, 25.9.

**HRMS (ESI):** Calcd for C<sub>19</sub>H<sub>21</sub>N<sub>2</sub><sup>+</sup> [M+H]<sup>+</sup> 277.1699, found 277.1692.

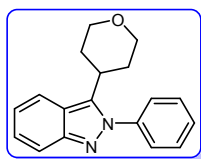

### 2-phenyl-3-(tetrahydro-2H-pyran-4-yl)-2H-indazole (**3r**)

Following the general procedure A, the crude product was purified by silica gel flash chromatography (PE: EA=15:1 as the eluent) to give **3r** (30 mg, 55% yield) as a yellow

solid. New compounds.

**<sup>1</sup>H NMR** (400 MHz, CDCl<sub>3</sub>)  $\delta$  7.88 (d,  $J$  = 8.6 Hz, 1H), 7.73 (d,  $J$  = 8.8 Hz, 1H), 7.57-7.45 (m, 5H), 7.33 -7.29 (m, 1H), 7.08 (dd,  $J$  = 8.0, 7.1 Hz, 1H), 4.07 (dd,  $J$  = 11.6, 4.1 Hz, 2H), 3.40 (t,  $J$  = 11.4 Hz, 2H), 3.23 (tt,  $J$  = 12.3, 3.8 Hz, 1H), 2.38 (qd,  $J$  = 12.7, 4.4 Hz, 2H), 1.78 (dd,  $J$  = 13.2, 1.8 Hz, 2H).

**<sup>13</sup>C NMR** (100 MHz, CDCl<sub>3</sub>)  $\delta$  148.9, 140.0, 138.9, 129.3, 129.3, 126.5, 126.4, 121.1, 120.8, 119.6, 118.0, 68.1, 34.6, 32.1.

**HRMS (ESI):** Calcd for  $C_{18}H_{19}N_2O^+$   $[M+H]^+$  279.1492, found 279.1483.

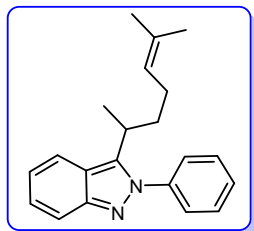

### 3-(6-methylhept-5-en-2-yl)-2-phenyl-2H-indazole (3s)

Following the general procedure A, the crude product was purified by silica gel flash chromatography (PE: EA=15:1 as the eluent) to give **3s** (39 mg, 65% yield) as a yellow oil. New compounds.

**$^1H$  NMR** (400 MHz,  $CDCl_3$ )  $\delta$  7.80 (d,  $J = 8.5$  Hz, 1H), 7.72 (d,  $J = 8.8$  Hz, 1H), 7.54-7.45 (m, 5H), 7.31-7.27 (m, 1H), 7.04 (dd,  $J = 7.9, 7.1$  Hz, 1H), 4.89-4.88 (m, 1H), 3.24-3.15 (m, 1H), 2.03-1.97 (m, 1H), 1.84-1.76 (m, 3H), 1.56 (s, 3H), 1.46 (d,  $J = 7.0$  Hz, 3H), 1.41 (s, 3H).

**$^{13}C$  NMR** (100 MHz,  $CDCl_3$ )  $\delta$  148.9, 141.1, 140.1, 132.2, 129.1, 129.0, 126.7, 126.3, 123.4, 120.8, 120.6, 119.2, 117.9, 36.6, 31.8, 26.1, 25.6, 20.7, 17.6.

**HRMS (ESI):** Calcd for  $C_{21}H_{25}N_2^+$   $[M+H]^+$  305.2012, found 305.2004.

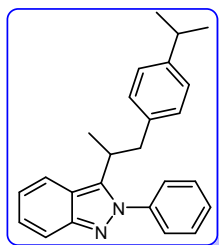

### 3-(1-(4-isopropylphenyl)propan-2-yl)-2-phenyl-2H-indazole(3t)

Following the general procedure A, the crude product was purified by silica gel flash chromatography (PE: EA=15:1 as the eluent) to give **3t** (45 mg, 64% yield) as a yellow solid. New compounds.

**<sup>1</sup>H NMR** (400 MHz, CDCl<sub>3</sub>)  $\delta$  7.90 (d,  $J$  = 8.5 Hz, 1H), 7.72 (d,  $J$  = 8.7 Hz, 1H), 7.40-7.36 (m, 1H), 7.333-7.30 (m, 3H), 7.12-7.08 (m, 1H), 6.95 (d,  $J$  = 8.0 Hz, 2H), 6.84 (d,  $J$  = 7.4 Hz, 2H), 6.63 (d,  $J$  = 8.0 Hz, 2H), 3.35-3.26 (m, 1H), 3.20 (dd,  $J$  = 12.9, 9.7 Hz, 1H), 2.95 (dd,  $J$  = 12.9, 5.5 Hz, 1H), 2.84 -2.77 (m, 1H), 1.54 (d,  $J$  = 7.0 Hz, 3H), 1.19 (dd,  $J$  = 6.9, 1.7 Hz, 6H).

**<sup>13</sup>C NMR** (100 MHz, CDCl<sub>3</sub>)  $\delta$  148.8, 146.9, 140.1, 139.7, 136.9, 128.9, 128.7, 128.6, 126.7, 126.3, 126.2, 120.8, 119.2, 118.0, 42.7, 35.5, 33.7, 24.1, 24.0, 20.7.

**HRMS (ESI)**: Calcd for C<sub>25</sub>H<sub>27</sub>N<sub>2</sub><sup>+</sup> [M+H]<sup>+</sup> 355.2169, found 355.2160.

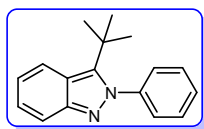

### **3-(tert-butyl)-2-phenyl-2H-indazole(3u)**

Following the general procedure A, the crude product was purified by silica gel flash chromatography (PE: EA=15:1 as the eluent) to give **3u** (32 mg, 65% yield) as a white solid. Compound is known.

**<sup>1</sup>H NMR** (400 MHz, CDCl<sub>3</sub>)  $\delta$  7.95 (d,  $J$  = 8.8 Hz, 1H), 7.67 (d,  $J$  = 8.7 Hz, 1H), 7.51-7.41 (m, 5H), 7.30-7.28(m, 1H), 7.06-7.02 (m, 1H), 1.43 (s, 9H).

**<sup>13</sup>C NMR** (100 MHz, CDCl<sub>3</sub>)  $\delta$  148.4, 144.4, 142.9, 129.4, 128.4, 128.1, 125.9, 122.6, 120.7, 119.7, 117.8, 34.7, 31.8.

**HRMS (ESI)**: Calcd for C<sub>17</sub>H<sub>19</sub>N<sub>2</sub><sup>+</sup> [M+H]<sup>+</sup> 251.1543, found 251.1536.

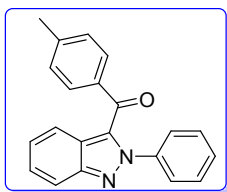

### (2-phenyl-2H-indazol-3-yl)(p-tolyl)methanone (**5a**)

Following the general procedure B, the crude product was purified by silica gel flash chromatography (PE: EA=15:1 as the eluent) to give **5a** (54 mg, 87% yield) as a yellow solid. Compound is known.

**<sup>1</sup>H NMR** (400 MHz, CDCl<sub>3</sub>)  $\delta$  7.88 (d,  $J$  = 9.0 Hz, 1H), 7.80 (d,  $J$  = 8.1 Hz, 2H), 7.55-7.53 (m, 2H), 7.44-7.35 (m, 5H), 7.26 (d,  $J$  = 8.2 Hz, 2H), 7.16 (dd,  $J$  = 8.2, 7.4 Hz, 1H), 2.43 (s, 3H).

**<sup>13</sup>C NMR** (100 MHz, CDCl<sub>3</sub>)  $\delta$  185.7, 148.5, 144.7, 140.5, 135.2, 132.5, 130.2, 129.4, 129.1, 128.9, 127.0, 125.5, 124.8, 123.9, 120.7, 118.5, 21.8.

**HRMS (ESI):** Calcd for C<sub>21</sub>H<sub>17</sub>N<sub>2</sub>O<sup>+</sup> [M+H]<sup>+</sup> 313.1335, found 313.1328.

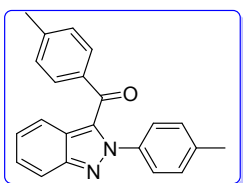

### p-tolyl(2-(p-tolyl)-2H-inden-1-yl)methanone (**5b**)

Following the general procedure B, the crude product was purified by silica gel flash chromatography (PE: EA=15:1 as the eluent) to give **5b** (60 mg, 92% yield) as a white solid. New compounds.

**<sup>1</sup>H NMR** (400 MHz, CDCl<sub>3</sub>)  $\delta$  7.87 (d,  $J$  = 8.7 Hz, 1H), 7.81 (d,  $J$  = 8.2 Hz, 2H), 7.42

(d,  $J = 8.3$  Hz, 2H), 7.37-7.33 (m, 2H), 7.27 (d,  $J = 8.0$  Hz, 2H), 7.22 (d,  $J = 8.1$  Hz, 2H), 7.16 -7.12 (m, 1H), 2.44 (s, 3H), 2.38 (s, 3H).

$^{13}\text{C}$  NMR (100 MHz,  $\text{CDCl}_3$ )  $\delta$  185.7, 148.4, 144.7, 138.9, 138.1, 135.2, 132.3, 130.2, 129.7, 129.4, 126.8, 125.2, 124.6, 123.8, 120.6, 118.4, 21.8, 21.2.

HRMS (ESI): Calcd for  $\text{C}_{24}\text{H}_{21}\text{O}^+$   $[\text{M}+\text{H}]^+$  327.1492, found 327.1491.

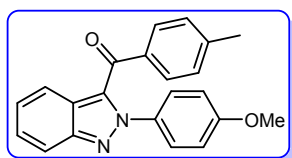

### (2-(4-methoxyphenyl)-2H-indazol-3-yl)(p-tolyl)methanone (5c)

Following the general procedure B, the crude product was purified by silica gel flash chromatography (PE: EA=15:1 as the eluent) to give **5c** (63 mg, 92% yield) as a white solid. New compounds.

$^1\text{H}$  NMR (400 MHz,  $\text{CDCl}_3$ )  $\delta$  7.86 (d,  $J = 8.7$  Hz, 1H), 7.80 (d,  $J = 7.8$  Hz, 2H), 7.46 (d,  $J = 8.6$  Hz, 2H), 7.38-7.34 (m, 2H), 7.27 (d,  $J = 8.3$  Hz, 2H), 7.17-7.13 (m, 1H), 6.93 (d,  $J = 8.6$  Hz, 2H), 3.82 (s, 3H), 2.45 (s, 3H).

$^{13}\text{C}$  NMR (100 MHz,  $\text{CDCl}_3$ )  $\delta$  185.7, 159.8, 148.3, 144.7, 135.3, 133.6, 132.3, 130.2, 129.3, 126.8, 126.6, 124.6, 123.7, 120.6, 118.3, 114.2, 55.5, 21.8.

HRMS (ESI): Calcd for  $\text{C}_{21}\text{H}_{17}\text{N}_2\text{O}^+$   $[\text{M}+\text{H}]^+$  343.1441, found 343.1433

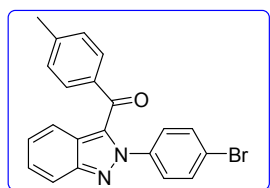

### (2-(4-bromophenyl)-2H-indazol-3-yl)(p-tolyl)methanone (5d)

Following the general procedure B, the crude product was purified by silica gel flash chromatography (PE: EA=15:1 as the eluent) to give **5d** (67 mg, 86% yield) as a white solid. New compounds.

**<sup>1</sup>H NMR** (400 MHz, CDCl<sub>3</sub>) δ 7.86 (d, *J* = 8.8 Hz, 1H), 7.81 (d, *J* = 8.2 Hz, 2H), 7.58-7.54 (m, 2H), 7.44-7.41 (m, 2H), 7.38 (ddd, *J* = 8.7, 6.6, 0.9 Hz, 1H), 7.33 (d, *J* = 8.6 Hz, 1H), 7.29 (d, *J* = 8.0 Hz, 2H), 7.17 (ddd, *J* = 8.6, 6.6, 0.6 Hz, 1H), 2.46 (s, 3H).

**<sup>13</sup>C NMR** (100 MHz, CDCl<sub>3</sub>) δ 185.5, 148.7, 145.1, 139.6, 135.1, 132.5, 132.3, 130.2, 129.5, 127.2, 127.0, 125.1, 123.9, 122.9, 120.7, 118.5, 21.9.

**HRMS (ESI)**: Calcd for C<sub>21</sub>H<sub>16</sub>BrN<sub>2</sub>O<sup>+</sup> [M+H]<sup>+</sup> 391.0441, found 391.0440.

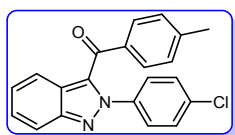

**(2-(4-chlorophenyl)-2H-indazol-3-yl)(p-tolyl)methanone (5e)**

Following the general procedure B, the crude product was purified by silica gel flash chromatography (PE: EA=15:1 as the eluent) to give **5e** (50 mg, 73% yield) as a white solid. New compounds.

**<sup>1</sup>H NMR** (400 MHz, CDCl<sub>3</sub>) δ 7.86 (d, *J* = 8.8 Hz, 1H), 7.81 (d, *J* = 8.1 Hz, 2H), 7.49 (d, *J* = 8.7 Hz, 2H), 7.41 (d, *J* = 8.7 Hz, 2H), 7.37-7.35 (m, 1H), 7.29 (dd, *J* = 18.9, 10.9 Hz, 3H), 7.20-7.12 (m, 1H), 2.46 (s, 3H).

**<sup>13</sup>C NMR** (100 MHz, CDCl<sub>3</sub>) δ 185.5, 148.6, 145.0, 139.0, 135.0, 134.8, 132.4, 130.2, 129.5, 129.2, 127.2, 126.6, 125.0, 123.9, 120.6, 118.5, 21.8.

**HRMS (ESI)**: Calcd for C<sub>17</sub>H<sub>19</sub>N<sub>2</sub><sup>+</sup> [M+H]<sup>+</sup> 347.0946, found 347.0940.

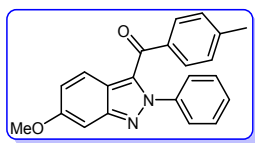

**(6-methoxy-2-phenyl-2H-indazol-3-yl)(p-tolyl)methanone (5f)**

Following the general procedure B, the crude product was purified by silica gel flash chromatography (PE: EA=15:1 as the eluent) to give **5f** (55 mg, 81% yield) as a yellow solid. New compounds.

**<sup>1</sup>H NMR** (400 MHz, CDCl<sub>3</sub>)  $\delta$  7.78 (d,  $J$  = 8.1 Hz, 2H), 7.52-7.50 (m, 2H), 7.42-7.35 (m, 3H), 7.25-7.21 (m, 3H), 7.09 (d,  $J$  = 1.9 Hz, 1H), 6.85 (dd,  $J$  = 9.2, 2.2 Hz, 1H), 3.89 (s, 3H), 2.42 (s, 3H).

**<sup>13</sup>C NMR** (100 MHz, CDCl<sub>3</sub>)  $\delta$  185.7, 159.2, 149.6, 144.7, 140.5, 135.1, 132.4, 130.1, 129.4, 129.0, 128.5, 125.3, 121.4, 119.9, 119.7, 95.0, 55.3, 21.8.

**HRMS (ESI)**: Calcd for C<sub>22</sub>H<sub>19</sub>N<sub>2</sub>O<sub>2</sub><sup>+</sup> [M+H]<sup>+</sup> 343.1441, found 343.1432.

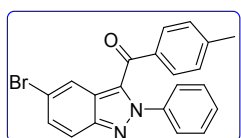

**(5-bromo-2-phenyl-2H-indazol-3-yl)(p-tolyl)methanone (5g)**

Following the general procedure B, the crude product was purified by silica gel flash chromatography (PE: EA=15:1 as the eluent) to give **5g** (53 mg, 68% yield) as a yellow solid. New compounds.

**<sup>1</sup>H NMR** (400 MHz, CDCl<sub>3</sub>)  $\delta$  7.77-7.74 (m, 3H), 7.59 (d,  $J$  = 1.2 Hz, 1H), 7.52-7.50 (m, 2H), 7.45-7.39 (m, 4H), 7.27 (d,  $J$  = 8.0 Hz, 2H), 2.45 (s, 3H).



$^{13}\text{C}$  NMR (100 MHz,  $\text{CDCl}_3$ )  $\delta$  185.3, 146.9, 145.2, 140.2, 134.8, 132.0, 130.9, 130.1, 129.6, 129.2, 129.1, 125.3, 124.9, 122.8, 120.2, 118.8, 21.9.

**HRMS (ESI):** Calcd for  $\text{C}_{21}\text{H}_{16}\text{BrN}_2\text{O}^+ [\text{M}+\text{H}]^+$  391.0441, found 391.0443.

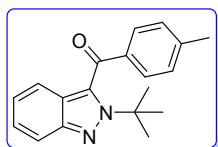

**(2-(tert-butyl)-2H-indazol-3-yl)(p-tolyl)methanone (5h)**

Following the general procedure B, the crude product was purified by silica gel flash chromatography (PE: EA=15:1 as the eluent) to give **5h** (25 mg, 43% yield) as a yellow solid. New compounds.

$^1\text{H}$  NMR (400 MHz,  $\text{CDCl}_3$ )  $\delta$  7.80-7.75 (m, 3H), 7.29 (d,  $J = 8.0$  Hz, 2H), 7.26-7.22 (m, 1H), 6.97-6.96 (m, 2H), 2.46 (s, 3H), 1.83 (s, 9H).

$^{13}\text{C}$  NMR (100 MHz,  $\text{CDCl}_3$ )  $\delta$  189.1, 145.8, 145.1, 135.7, 132.0, 130.5, 129.6, 125.7, 124.1, 123.1, 120.1, 117.9, 64.1, 30.7, 21.9.

**HRMS (ESI):** Calcd for  $\text{C}_{19}\text{H}_{21}\text{N}_2\text{O}^+ [\text{M}+\text{H}]^+$  293.1648, found 293.1646.

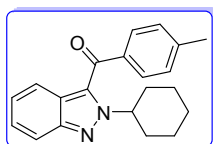

**(2-cyclohexyl-2H-indazol-3-yl)(p-tolyl)methanone (5i)**

Following the general procedure B, the crude product was purified by silica gel flash chromatography (PE: EA=15:1 as the eluent) to give **5i** (29 mg, 45% yield) as a white solid. New compounds.

**<sup>1</sup>H NMR** (400 MHz, CDCl<sub>3</sub>) δ 7.82 (d, *J* = 8.7 Hz, 1H), 7.78 (d, *J* = 8.1 Hz, 2H), 7.31 (d, *J* = 7.8 Hz, 2H), 7.29-7.25 (m, 1H), 7.06-7.05 (m, 2H), 5.15-5.07 (m, 1H), 2.48 (s, 3H), 2.20-2.11 (m, 4H), 1.94 (d, *J* = 13.2 Hz, 2H), 1.77-1.73 (m, 1H), 1.54-1.42 (m, 2H), 1.41- 1.33 (m, 1H).

**<sup>13</sup>C NMR** (100 MHz, CDCl<sub>3</sub>) δ 186.3, 147.3, 144.3, 136.2, 131.2, 130.1, 129.3, 125.7, 124.0, 123.3, 120.6, 118.3, 61.3, 33.8, 25.7, 25.4, 21.8.

**HRMS (ESI):** Calcd for C<sub>21</sub>H<sub>23</sub>N<sub>2</sub>O<sup>+</sup> [M+H]<sup>+</sup> 319.1805, found 319.1797.

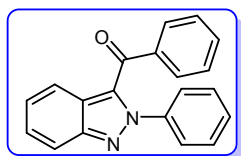

**phenyl(2-phenyl-2H-indazol-3-yl)methanone (5j)**

Following the general procedure B, the crude product was purified by silica gel flash chromatography (PE: EA=15:1 as the eluent) to give **5j** (52 mg, 87% yield) as a yellow solid. Compound is known.

**<sup>1</sup>H NMR** (400 MHz, CDCl<sub>3</sub>) δ 7.90-7.86 (m, 3H), 7.61 (t, *J* = 7.4 Hz, 1H), 7.55-7.52 (m, 2H), 7.48-7.36 (m, 7H), 7.18 (dd, *J* = 8.2, 7.0 Hz, 1H).

**<sup>13</sup>C NMR** (100 MHz, CDCl<sub>3</sub>) δ 186.0, 148.6, 140.5, 137.9, 133.6, 132.3, 129.9, 129.1, 129.0, 128.7, 127.1, 125.6, 125.1, 124.1, 120.6, 118.6.

**HRMS (ESI):** Calcd for C<sub>17</sub>H<sub>19</sub>N<sub>2</sub><sup>+</sup> [M+H]<sup>+</sup> 299.1179, found 299.1171.

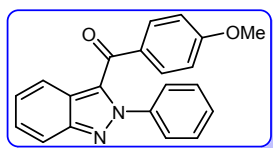

**(4-methoxyphenyl)(2-phenyl-2H-indazol-3-yl)methanone(5k)**

Following the general procedure B, the crude product was purified by silica gel flash chromatography (PE: EA=15:1 as the eluent) to give **5k** (33 mg, 51% yield) as a white solid. Compound is known.

**<sup>1</sup>H NMR** (400 MHz, CDCl<sub>3</sub>) δ 7.91-7.86 (m, 3H), 7.56-7.54 (m, 2H), 7.45-7.36 (m, 5H), 7.19-7.15 (m, 1H), 6.95 (d, *J* = 8.5 Hz, 2H), 3.89 (s, 3H).

**<sup>13</sup>C NMR** (100 MHz, CDCl<sub>3</sub>) δ 184.7, 164.1, 148.5, 140.5, 132.6, 132.5, 130.5, 129.1, 128.8, 126.9, 125.4, 124.6, 123.7, 120.6, 118.4, 113.9, 55.6.

**HRMS (ESI)**: Calcd for C<sub>24</sub>H<sub>17</sub>N<sub>2</sub>O<sup>+</sup> [M+H]<sup>+</sup> 329.1285, found 329.1276.

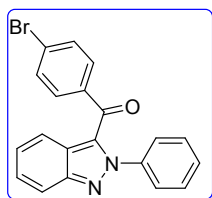

**(4-bromophenyl)(2-phenyl-2H-indazol-3-yl)methanone (5l)**

Following the general procedure B, the crude product was purified by silica gel flash chromatography (PE: EA=15:1 as the eluent) to give **5l** (41 mg, 55% yield) as a yellow solid. Compound is known.

**<sup>1</sup>H NMR** (400 MHz, CDCl<sub>3</sub>) δ 7.88 (dd, *J* = 8.5, 1.2 Hz, 1H), 7.72-7.70 (m, 2H), 7.60-7.57 (m, 2H), 7.52-7.50 (m, 2H), 7.43-7.36 (m, 5H), 7.21-7.17 (m, 1H).

**<sup>13</sup>C NMR** (100 MHz, CDCl<sub>3</sub>) δ 184.7, 148.6, 140.4, 136.5, 132.0, 131.8, 131.3, 129.1, 129.1, 128.8, 127.1, 125.5, 125.3, 124.0, 120.3, 118.7.

**HRMS (ESI)**: Calcd for C<sub>20</sub>H<sub>14</sub>BrN<sub>2</sub>O<sup>+</sup> [M+H]<sup>+</sup> 377.0284, found 377.0278.

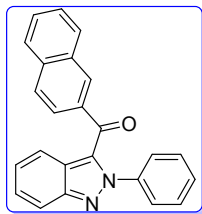

**naphthalen-2-yl(2-phenyl-2H-indazol-3-yl)methanone (5m)**

Following the general procedure B, the crude product was purified by silica gel flash chromatography (PE: EA=15:1 as the eluent) to give **5m** (49 mg, 70% yield) as a white solid. Compound is known.

**<sup>1</sup>H NMR** (400 MHz, CDCl<sub>3</sub>)  $\delta$  8.40 (s, 1H), 7.99-7.85 (m, 5H), 7.63-7.55 (m, 4H), 7.41-7.36 (m, 5H), 7.15 (dd,  $J$  = 8.2, 6.8 Hz, 1H).

**<sup>13</sup>C NMR** (100 MHz, CDCl<sub>3</sub>)  $\delta$  185.9, 148.6, 140.6, 135.9, 135.1, 132.5, 132.5, 132.3, 129.6, 129.1, 129.0, 129.0, 128.8, 127.9, 127.1, 127.1, 125.5, 125.1, 125.0, 124.1, 120.6, 118.6.

**HRMS (ESI)**: Calcd for C<sub>24</sub>H<sub>17</sub>N<sub>2</sub>O<sup>+</sup> [M+H]<sup>+</sup> 349.1335, found 349.1326.

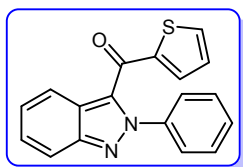

**(2-phenyl-2H-indazol-3-yl)(thiophen-2-yl)methanone (5n)**

Following the general procedure B, the crude product was purified by silica gel flash chromatography (PE: EA=15:1 as the eluent) to give **5n** (47 mg, 78% yield) as a yellow solid. Compound is known.

**<sup>1</sup>H NMR** (400 MHz, CDCl<sub>3</sub>)  $\delta$  7.88 (d,  $J$  = 8.8 Hz, 1H), 7.76 (dd,  $J$  = 4.9, 0.7 Hz, 1H), 7.66-7.63 (m, 2H), 7.58-7.56 (m, 2H), 7.47-7.37(m, 4H), 7.24-7.20 (m, 1H),

7.13-7.11 (m, 1H).

$^{13}\text{C}$  NMR (100 MHz,  $\text{CDCl}_3$ )  $\delta$  177.9, 148.6, 144.2, 140.4, 135.6, 135.5, 132.1, 129.2, 129.0, 128.3, 127.1, 125.4, 124.9, 123.6, 120.4, 118.5.

**HRMS (ESI):** Calcd for  $\text{C}_{17}\text{H}_{19}\text{N}_2^+$   $[\text{M}+\text{H}]^+$  305.0743, found 305.0735.

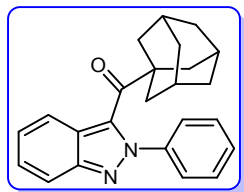

#### **((1r,3R,5S)-adamantan-1-yl)(2-phenyl-2H-indazol-3-yl)methanone(5o)**

Following the general procedure B, the crude product was purified by silica gel flash chromatography (PE: EA=15:1 as the eluent) to give **5o** (28 mg, 40% yield) as a white solid. New compounds.

$^1\text{H}$  NMR (400 MHz,  $\text{CDCl}_3$ )  $\delta$  7.78 (d,  $J = 8.8$  Hz, 1H), 7.60-7.55 (m, 3H), 7.52-7.43 (m, 3H), 7.37-7.33 (m, 1H), 7.18-7.14 (m, 1H), 1.92 (s, 3H), 1.68 (d,  $J = 2.2$  Hz, 6H), 1.65-1.62 (m, 3H), 1.54-1.51 (m, 3H).

$^{13}\text{C}$  NMR (100 MHz,  $\text{CDCl}_3$ )  $\delta$  206.1, 148.5, 141.1, 133.9, 129.4, 129.0, 127.0, 125.0, 123.3, 121.7, 120.1, 117.9, 48.2, 38.1, 36.1, 27.7.

**HRMS (ESI):** Calcd for  $\text{C}_{24}\text{H}_{25}\text{N}_2\text{O}^+$   $[\text{M}+\text{H}]^+$  357.1961, found 357.1954.

## **4. Scale-up Synthesis**

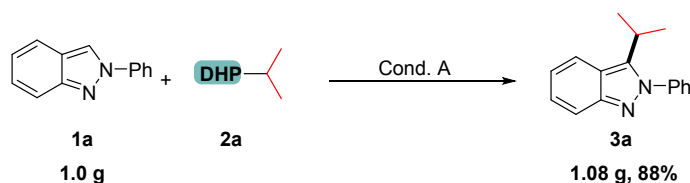

The reaction vessel was charged with 2-phenyl-2H-indazole (**1a**, 5.15 mmol, 1 g), diethyl 4-isopropyl-2,6-dimethyl-1,4-dihydropyridine-3,5-dicarboxylate (**2a**, 15.45 mmol, 4.56 g), Na<sub>2</sub>S<sub>2</sub>O<sub>8</sub> (3.0 equiv., 3.68 g), AgNO<sub>3</sub> (30 mol%, 262.4 mg) and TFA (2.0 equiv., 1.17 g) in *i*-PrOH /H<sub>2</sub>O (1:1, 104 mL), and the reaction mixture was stirred under nitrogen atmosphere at room temperature for 2 h. After completion, the reaction mixture was quenched with 100 mL water/ethyl acetate (1:1). Then the reaction mixture was extracted with ethyl acetate and the organic phase was washed with Brine, dried over anhydrous Na<sub>2</sub>SO<sub>4</sub>. After evaporating the solvent under reduced pressure, the crude product was purified by column chromatography using petroleum ether/ethyl acetate as the eluents. The product was obtained as a yellow solid (1.08 g, 88%).

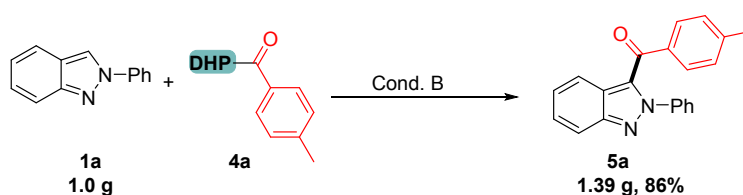

The reaction vessel was charged with 2H-indazole (**1a**, 5.15 mmol, 1 g), diethyl 2,6-dimethyl-4-(4-methylbenzoyl)-1,4-dihydropyridine-3,5-dicarboxylate (**4a**, 15.45 mmol, 5.74 g), Na<sub>2</sub>S<sub>2</sub>O<sub>8</sub> (3.0 equiv., 3.68 g), AgNO<sub>3</sub> (40 mol%, 350 mg) and TFA (3.0 equiv., 1.76 g) in acetone/H<sub>2</sub>O (1:1, 104 mL), and the reaction mixture was stirred under nitrogen atmosphere at 25 °C for 4 hours. After completion, the reaction mixture was quenched with 100 mL water/ethyl acetate (1:1). Then the reaction mixture was extracted with ethyl acetate and the organic phase was washed with Brine, dried over anhydrous Na<sub>2</sub>SO<sub>4</sub>. After evaporating the solvent under reduced pressure, the crude product was purified by column chromatography using petroleum ether/ethyl acetate as the eluents. The product was obtained as a yellow solid (1.39 g, 86%).

## 5. Synthesis of Bioactive Molecules

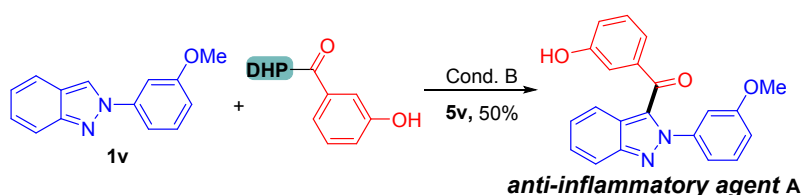

The reaction vessel was charged with 2-(3-methoxyphenyl)-2H-indazole (**1v**, 0.2 mmol, 44.9 mg), diethyl 4-(3-hydroxybenzoyl)-2,6-dimethyl-1,4-dihydropyridine-3,5-dicarboxylate (0.6 mmol, 224 mg), Na<sub>2</sub>S<sub>2</sub>O<sub>8</sub> (3.0 equiv., 143 mg), AgNO<sub>3</sub> (40 mol%, 14 mg) and TFA (3.0 equiv., 68 mg) in acetone/H<sub>2</sub>O (1:1, 4 mL), and the reaction mixture was stirred under nitrogen atmosphere at 25 °C for 4 hours. After completion, the reaction mixture was quenched with 20 mL water/ethyl acetate (1:1). Then the reaction mixture was extracted with ethyl acetate and the organic phase was washed with Brine, dried over anhydrous Na<sub>2</sub>SO<sub>4</sub>. After evaporating the solvent under reduced pressure, the crude product was purified by column chromatography using petroleum ether/ethyl acetate as the eluents. The product was obtained as a yellow solid (34.4 mg, 50%).

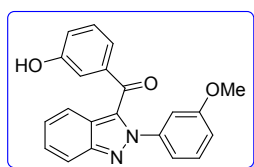

### **(3-hydroxyphenyl)(2-(3-methoxyphenyl)-2H-indazol-3-yl)methanone (5v)**

Following the general procedure B, the crude product was purified by silica gel flash chromatography (PE: EA=10:1 as the eluent) to give **5v** (34mg, 50% yield) as a white solid

<sup>1</sup>H NMR (400 MHz, DMSO) δ 9.87 (s, 1H), 7.90 (d, *J* = 8.7 Hz, 1H), 7.45-7.22 (m,

6H), 7.18-7.15 (m, 2H), 7.10-7.02 (m, 3H), 3.78 (s, 3H).

$^{13}\text{C}$  NMR (100 MHz, DMSO)  $\delta$  185.5, 159.4, 157.5, 147.7, 141.1, 138.5, 132.2, 129.9, 127.1, 125.0, 123.3, 120.9, 120.5, 120.2, 118.1, 117.6, 115.4, 114.7, 111.1, 55.4.

**HRMS (ESI):** Calcd for  $\text{C}_{21}\text{H}_{17}\text{N}_2\text{O}_3^+$   $[\text{M}+\text{H}]^+$  345.1234, found 345.1226.

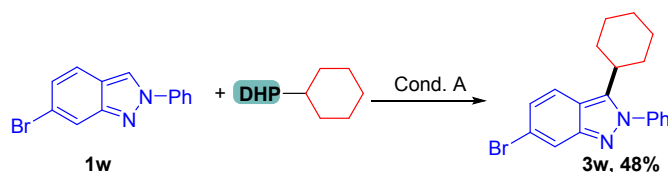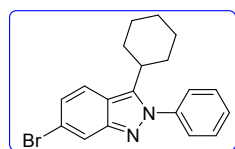

### 6-bromo-3-cyclohexyl-2-phenyl-2H-indazole (3w)

Following the general procedure A, the crude product was purified by silica gel flash chromatography (PE: EA=20:1 as the eluent) to give **3w** (34mg, 48% yield) as a white solid

$^1\text{H}$  NMR (400 MHz,  $\text{CDCl}_3$ )  $\delta$  7.87 (s, 1H), 7.73 (d,  $J = 9.0$  Hz, 1H), 7.57-7.50 (m, 3H), 7.46-7.44 (m, 2H), 7.11 (dd,  $J = 9.0, 1.5$  Hz, 1H), 2.98-2.90 (m, 1H), 1.93-1.83 (m, 6H), 1.78-1.74 (m, 1H), 1.39-1.19 (m, 3H).

$^{13}\text{C}$  NMR (100 MHz,  $\text{CDCl}_3$ )  $\delta$  149.5, 141.8, 139.8, 129.2, 129.2, 126.3, 124.2, 122.6, 120.4, 120.1, 118.1, 37.2, 32.6, 26.4, 25.7.

**HRMS (ESI):** Calcd for  $\text{C}_{19}\text{H}_{20}\text{BrN}_2^+$   $[\text{M}+\text{H}]^+$  355.0804, found 355.0797.



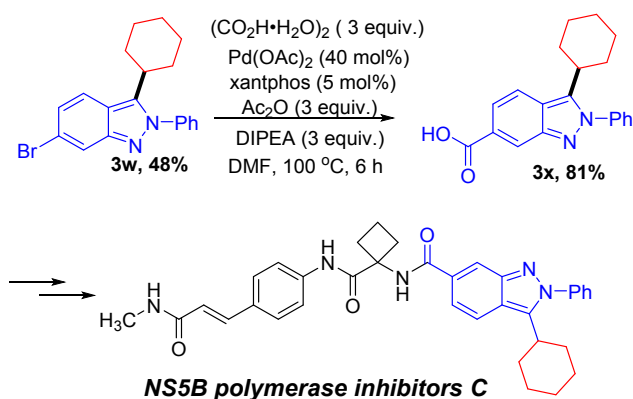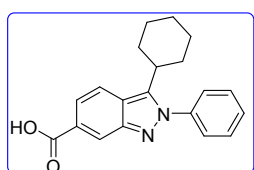

### 3-cyclohexyl-2-phenyl-2H-indazole-6-carboxylic acid (**3x**)<sup>[7]</sup>

A 10 mL Schlenk tube equipped with a stir bar was charged with  $(\text{CO}_2\text{H}\cdot\text{H}_2\text{O})_2$  (3 equiv.),  $\text{Pd}(\text{OAc})_2$  (40 mol%), xantphos (5 mol%), 6-bromo-3-cyclohexyl-2-phenyl-2H-indazole (**3w**) (0.2 mmol),  $\text{Ac}_2\text{O}$  (3 equiv.), DIPEA (3 equiv.), and DMF (1.0 mL) in air. The tube was quickly sealed with a Teflon® high pressure valve, frozen in liquid nitrogen, evacuated and backfilled with  $\text{N}_2$  (5 times). After the reaction mixture was stirred in a preheated oil bath (100 °C) for 6 h, it was allowed to cool down to room temperature. Then the reaction mixture was extracted with ethyl acetate and the organic phase was washed with Brine, dried over anhydrous  $\text{Na}_2\text{SO}_4$ . The crude product was purified by silica gel flash chromatography (PE: EA=5:1 to EA as the eluent), then recrystallization with  $\text{CHCl}_3$  to give **3x** (52 mg, 81% yield) as a white solid.

**$^1\text{H}$  NMR** (400 MHz, DMSO)  $\delta$  12.97 (br, 1H), 8.29 (s, 1H), 8.06 (d,  $J = 8.9$  Hz, 1H), 7.65-7.56 (m, 6H), 2.92-2.87 (m, 1H), 1.97-1.91 (m, 4H), 1.80-1.77 (m, 2H), 1.68-1.65 (m, 1H), 1.42-1.33 (m, 1H), 1.20-1.17 (m, 2H).

**$^{13}\text{C}$  NMR** (100 MHz, DMSO)  $\delta$  167.6, 147.3, 141.2, 139.4, 129.4, 129.3, 128.6,

126.3, 121.6, 120.7, 120.5, 119.8, 36.7, 31.7, 26.1, 25.0.

**HRMS (ESI):** Calcd for  $C_{20}H_{21}N_2O_2^+$   $[M+H]^+$  321.1598, found 321.1591.

## 6. Control Experiment

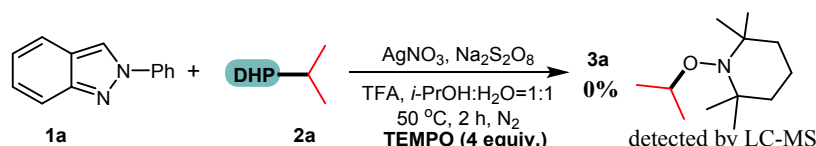

The reaction vessel was charged with 2-phenyl-2H-indazole (**1a**, 0.2 mmol), diethyl 4-isopropyl-2,6-dimethyl-1,4-dihydropyridine-3,5-dicarboxylate (**2a**, 0.6 mmol, 177 mg),  $\text{Na}_2\text{S}_2\text{O}_8$  (3.0 equiv., 143 mg),  $\text{AgNO}_3$  (30 mol%, 10 mg), TEMPO (4.0 equiv., 125 mg) and TFA (2.0 equiv., 46 mg) in *i*-PrOH / $\text{H}_2\text{O}$  (1:1, 4 mL), and the reaction mixture was stirred under nitrogen atmosphere at room temperature for 2 h.

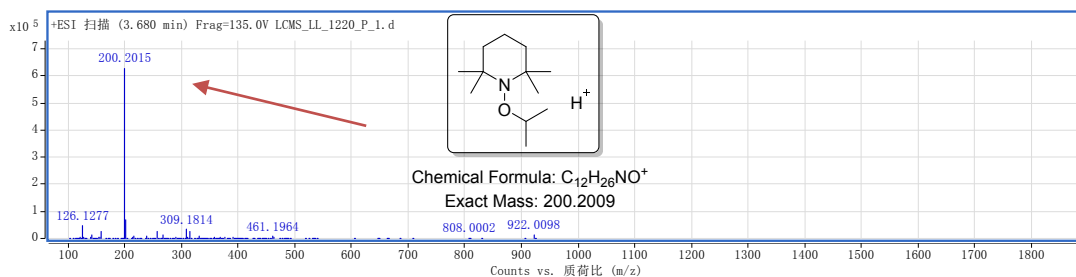

**HRMS (ESI):** Calcd for  $C_{12}H_{26}NO^+$   $[M+H]^+$  200.2009, found 200.2015.

## 7. References

- [1] N. E. Genung, L. Wei, G. E. Aspnes, *Org. Lett.* 2014, **16**, 3114-3117.
- [2] G. Bogonda, H. Y. Kim, K. Oh, *Org. Lett.* 2018, **20**, 2711-2715.
- [3] Á. Gutiérrez-Bonet, C. Remeur, J. K. Matsui, G. A. Molander, *J. Am. Chem. Soc.* 2017, **139**, 12251-12258.
- [4] J. P. Phelan, S. B. Lang, J. Sim, S. Berritt, A. J. Peat, K. Billings, L. Fan, G. A.

Molander, *J. Am. Chem. Soc.* 2019, **141**, 3723-3732.

[5] G. X. Li, R. Chen, L. Wu, Q. Q. Fu, X. M. Zhang, Z. Tang, *Angew. Chem. Int. Ed.* 2013, **52**, 8432-8436.

[6] G. Goti, B. Bieszczad, A. Vega-Peñaloza, P. Melchiorre, *Angew. Chem. Int. Ed.* 2019, **58**, 1213-1217.

[7] C. D. Shao, A. L. Lu, X. L. Wang, B. Zhou, X. H. Guan, Y. H. Zhang, *Org. Biomol. Chem.* 2017, **15**, 5033-5040.

## 8. $^1\text{H}$ NMR and $^{13}\text{C}$ NMR Spectra of the Products

3a

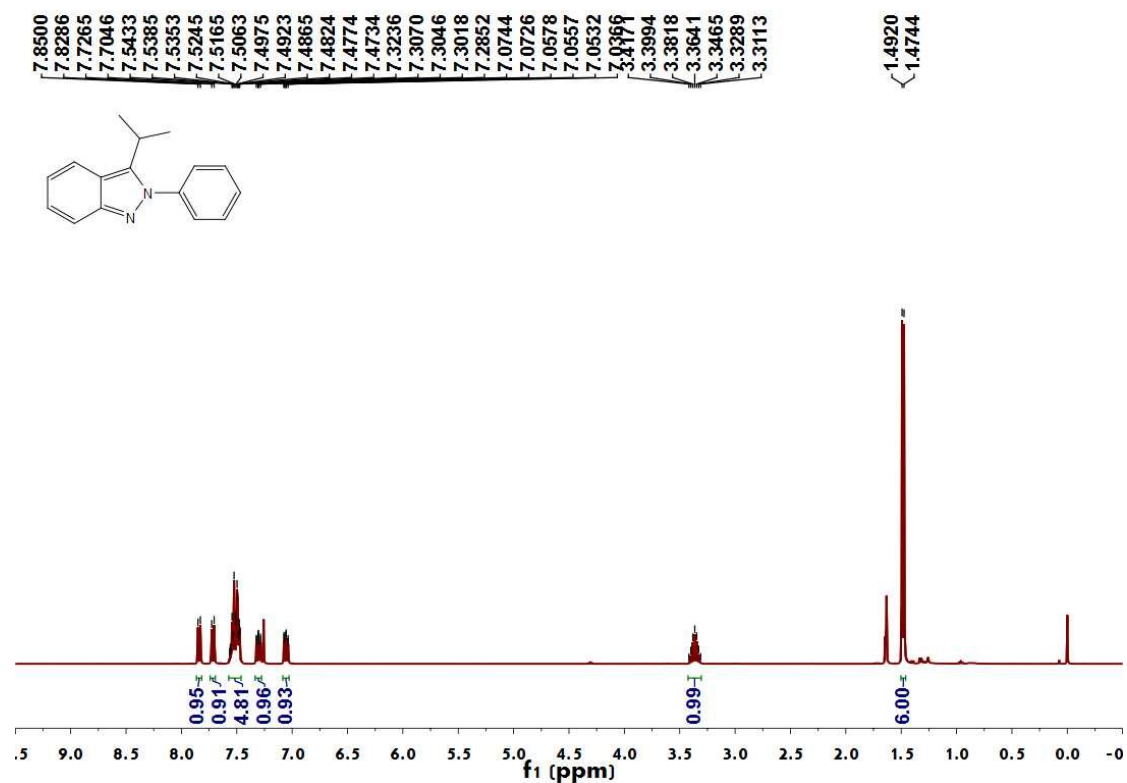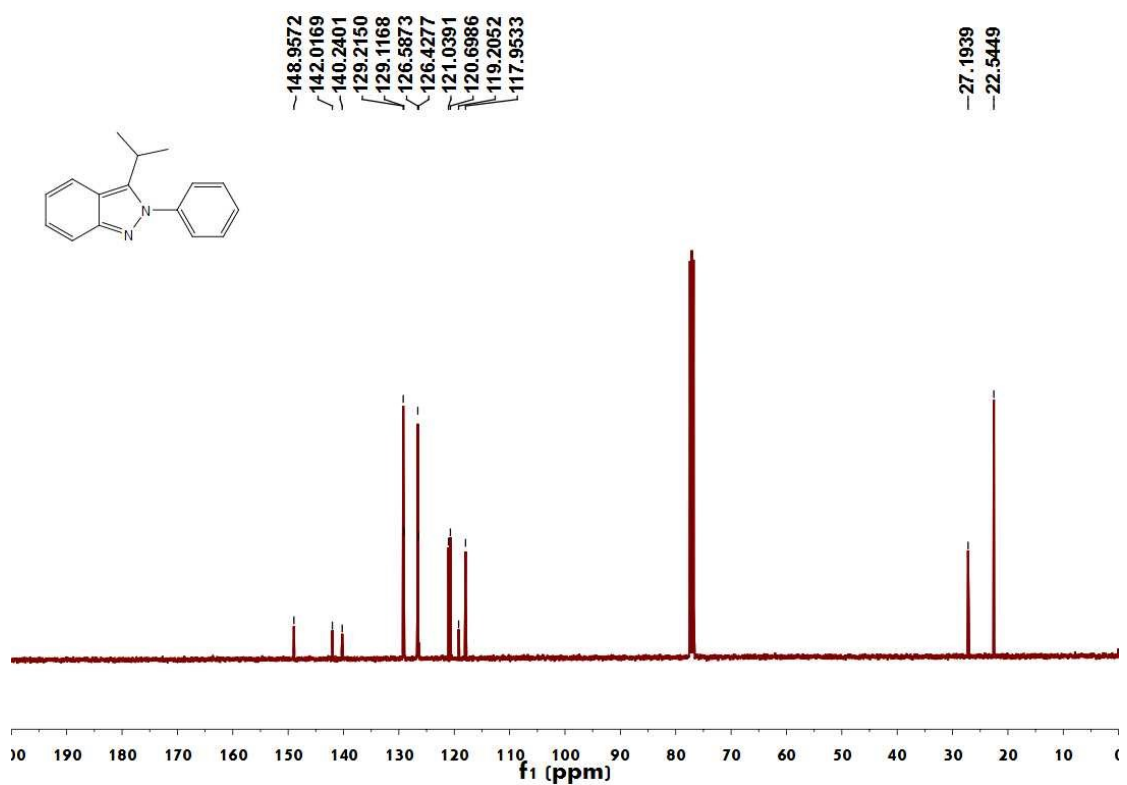

3b

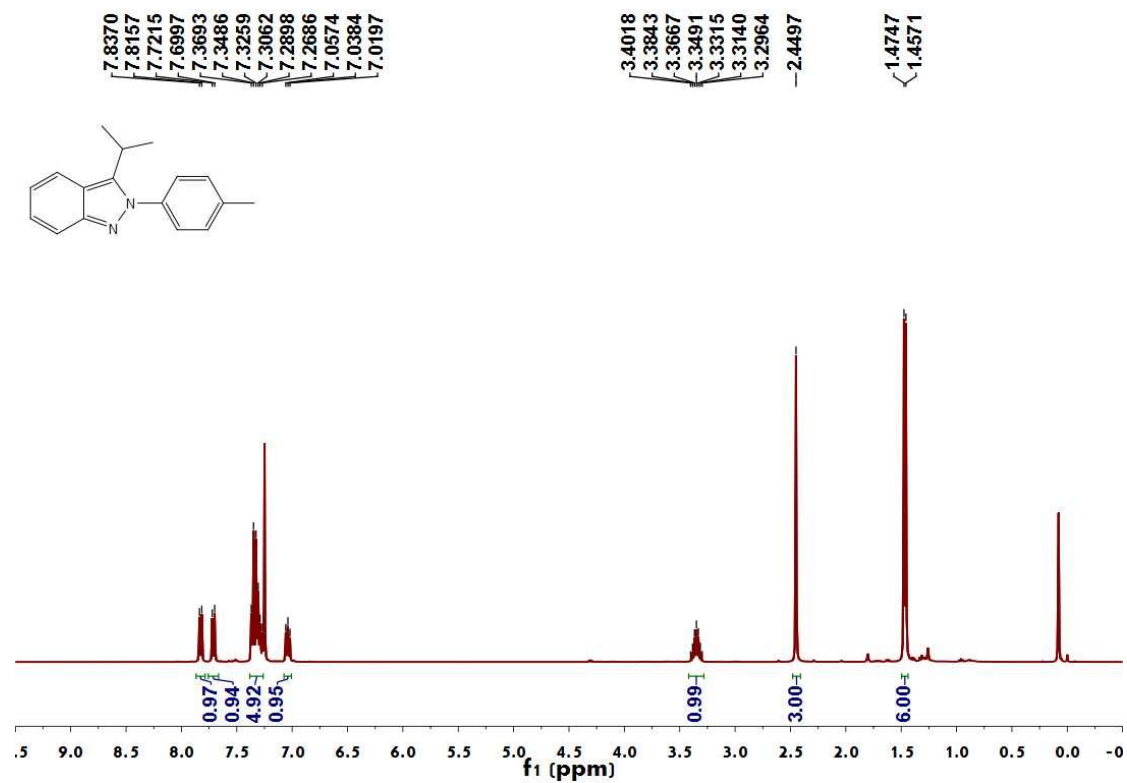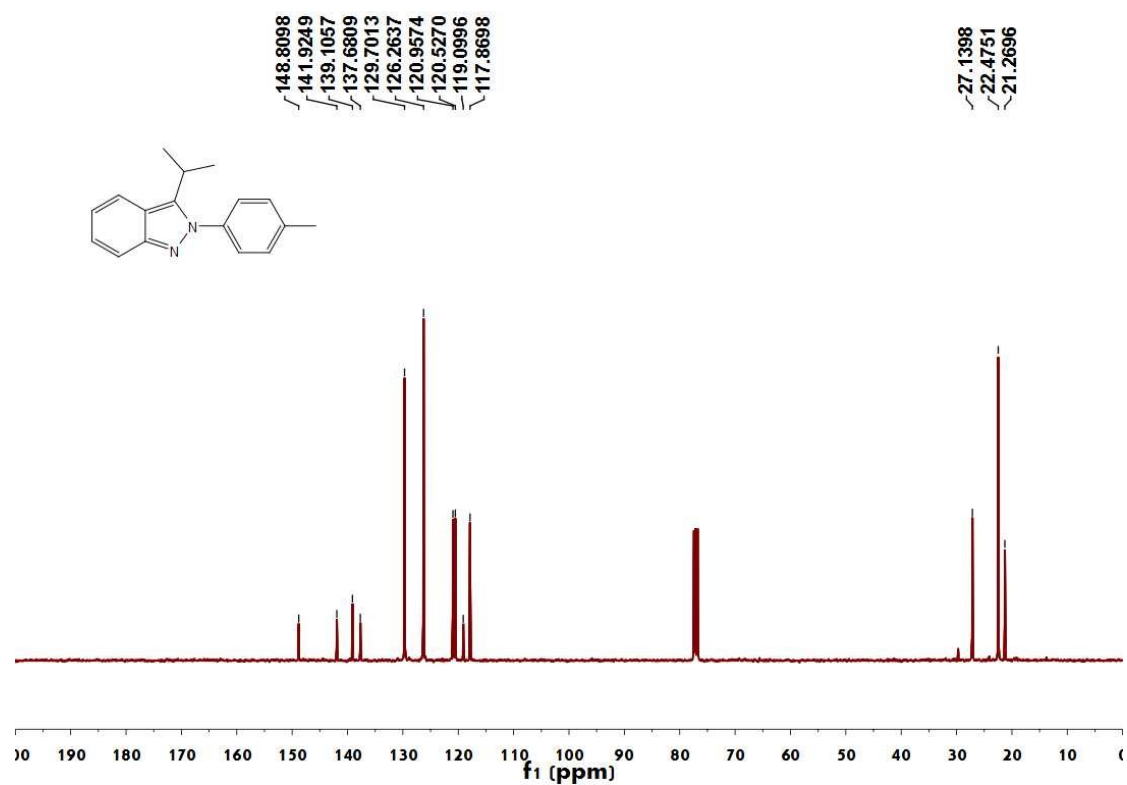

3c

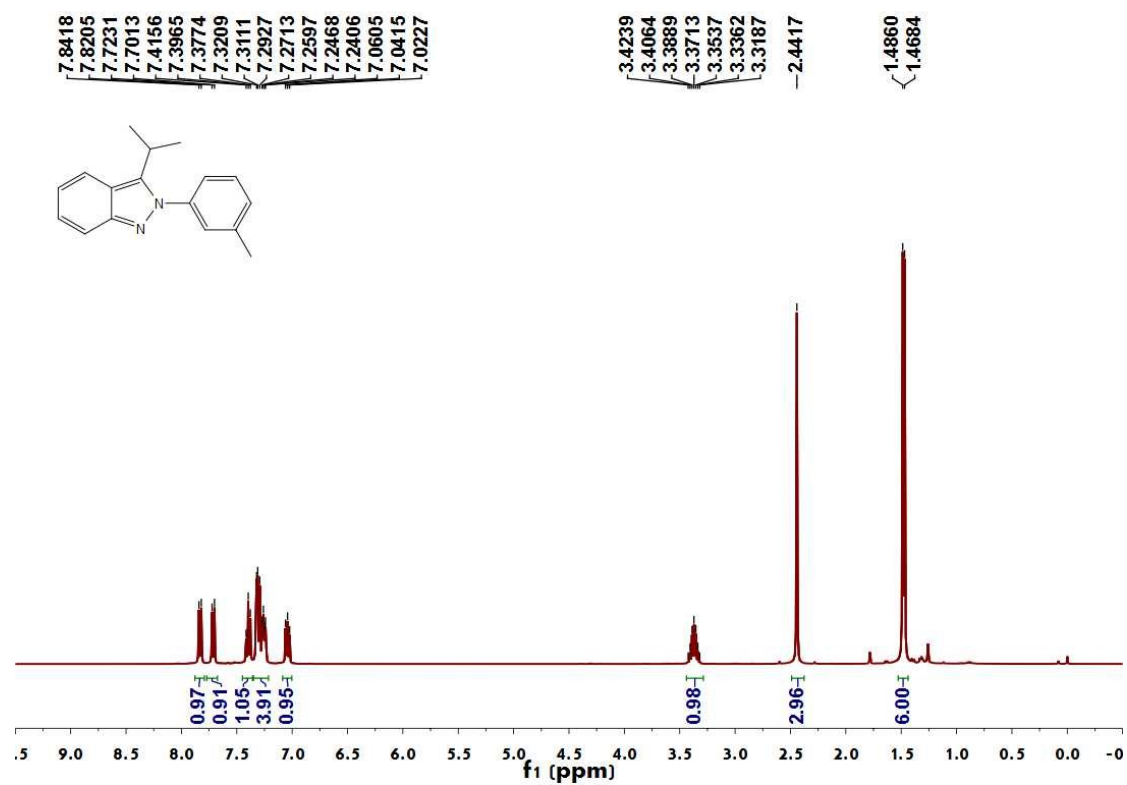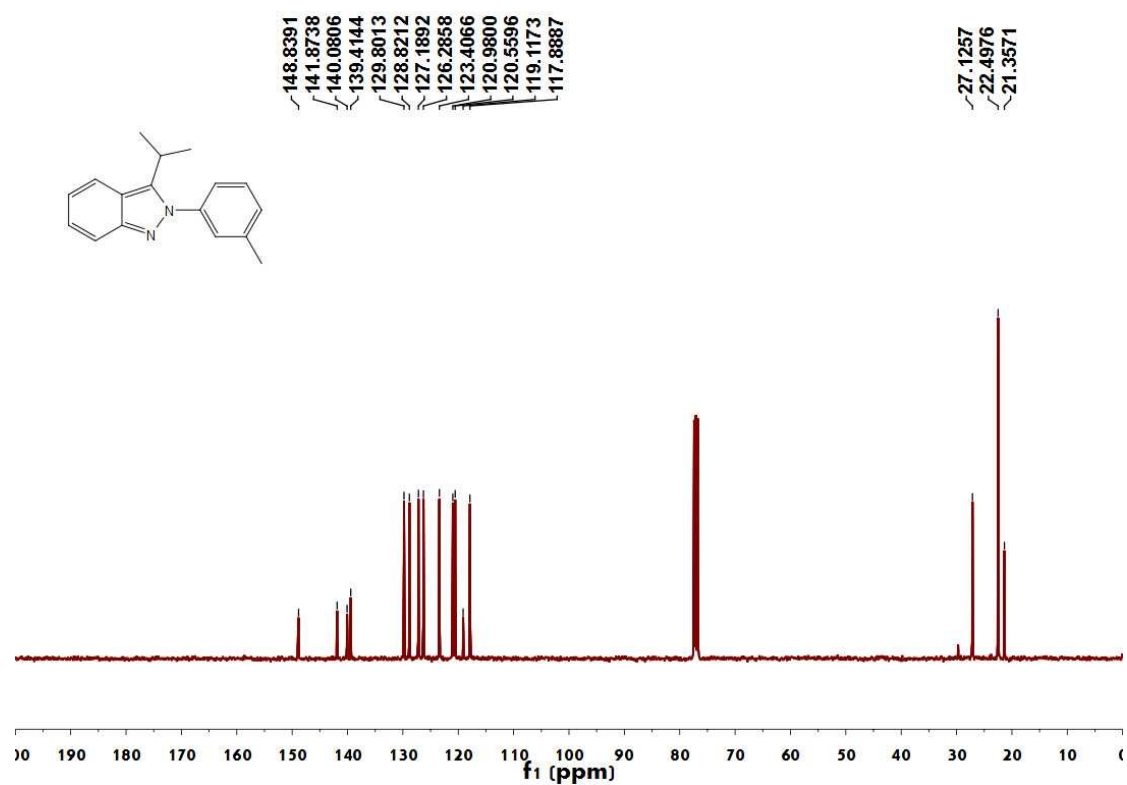

3d

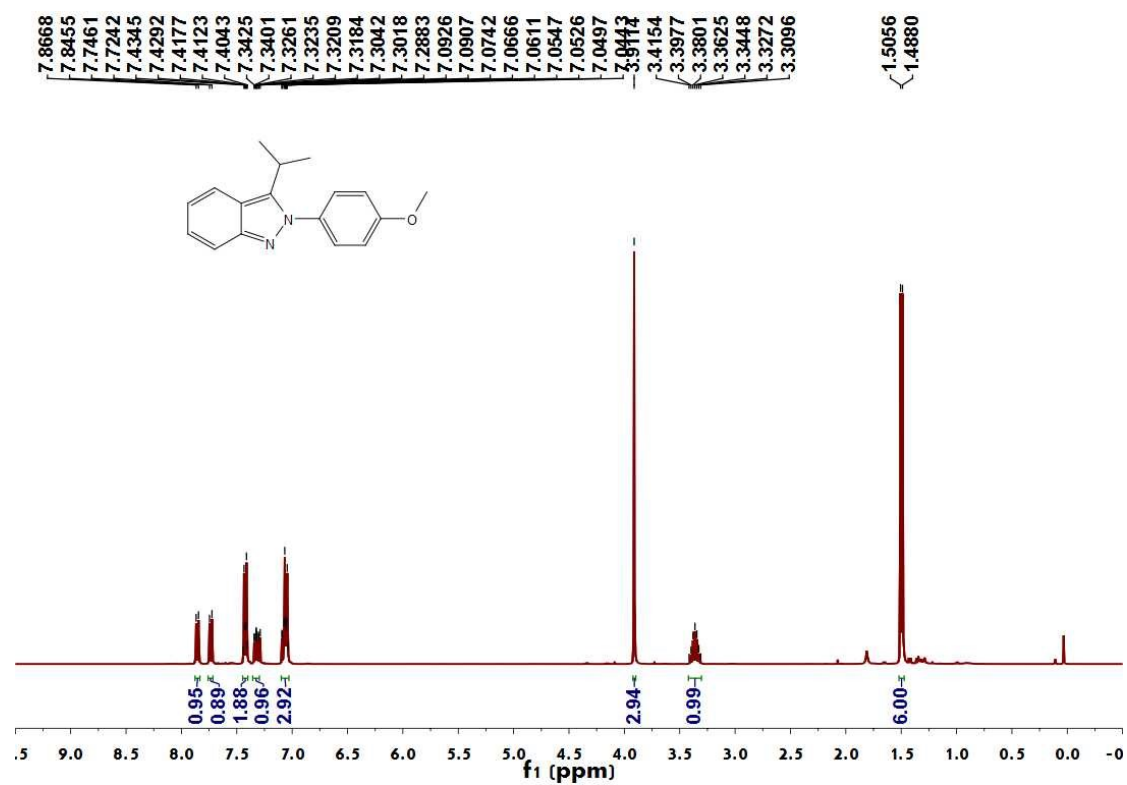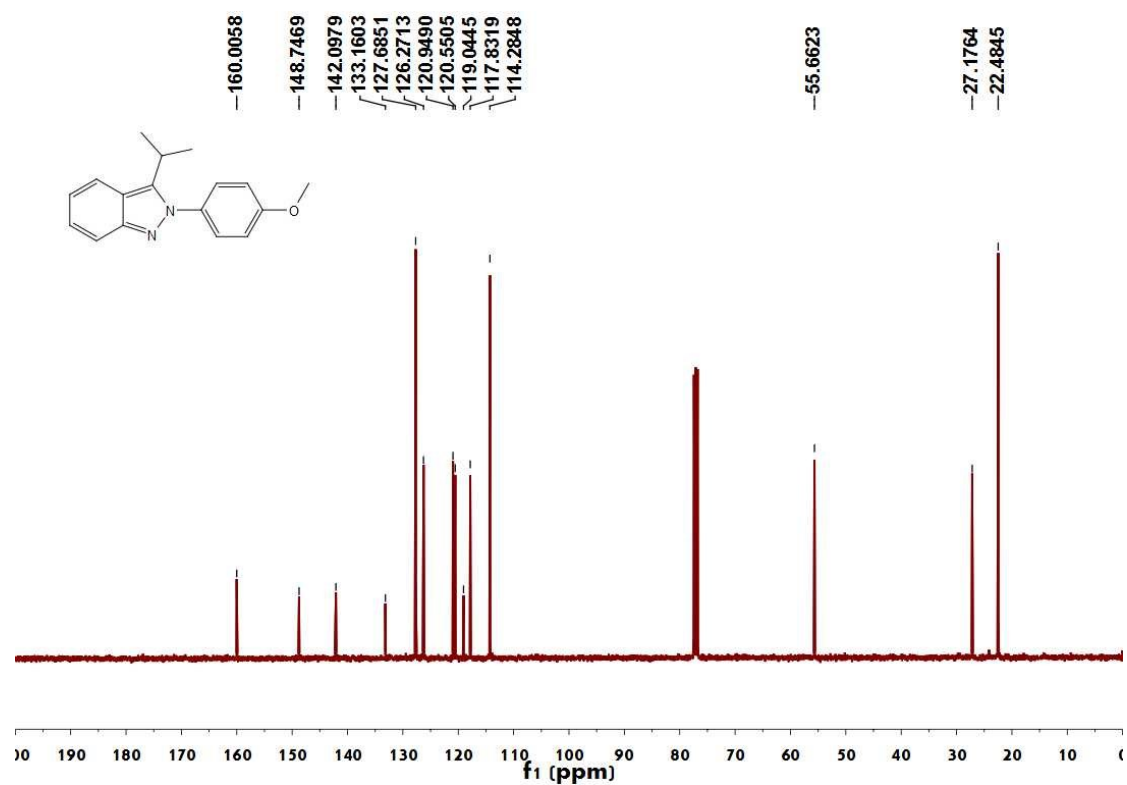

3e

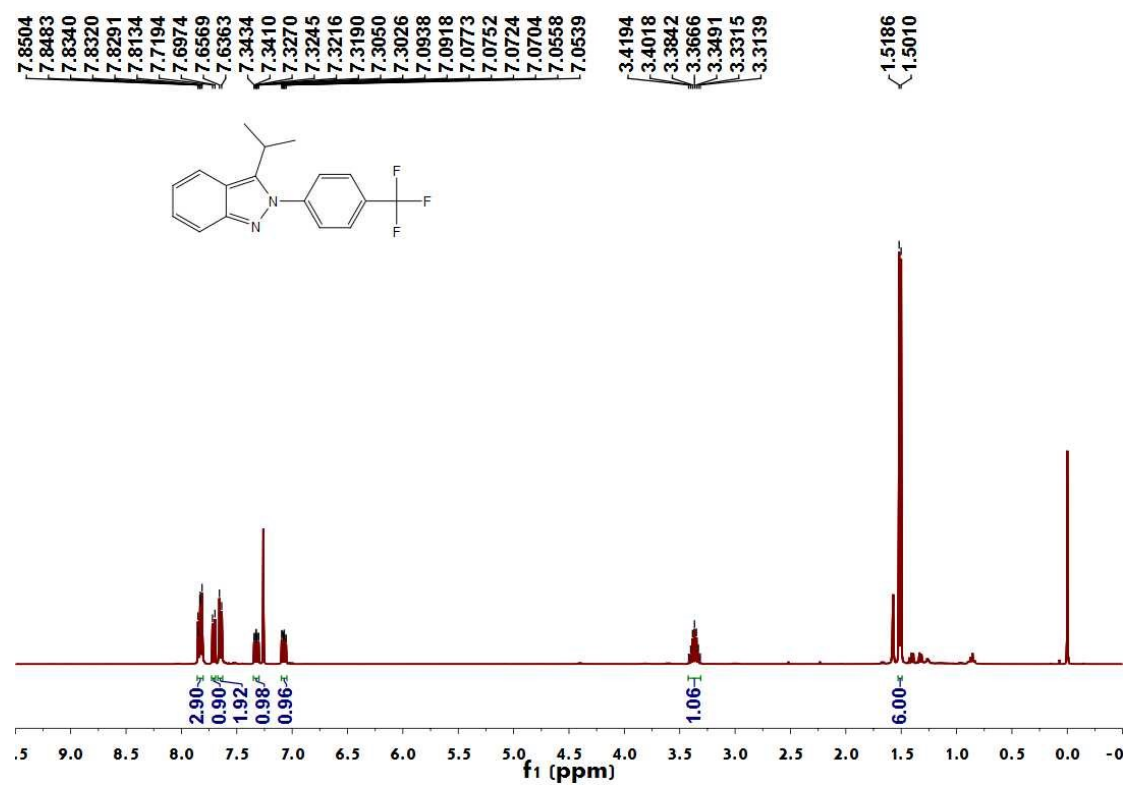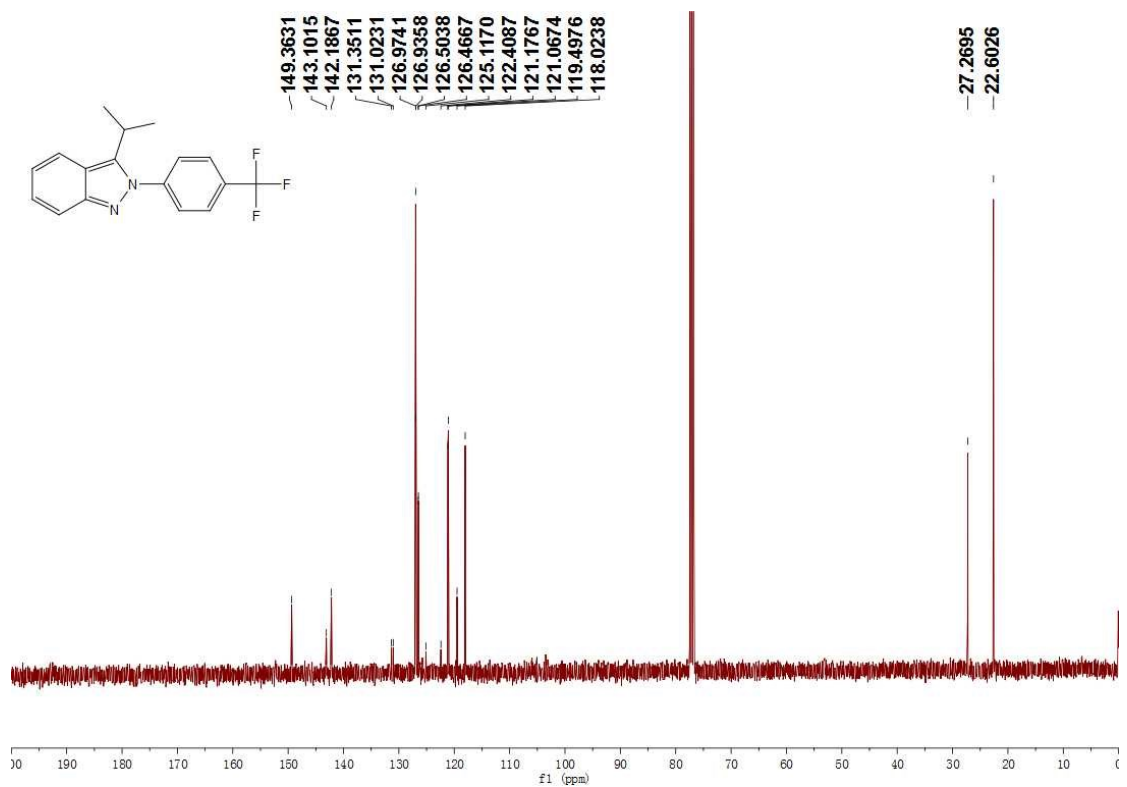



3f

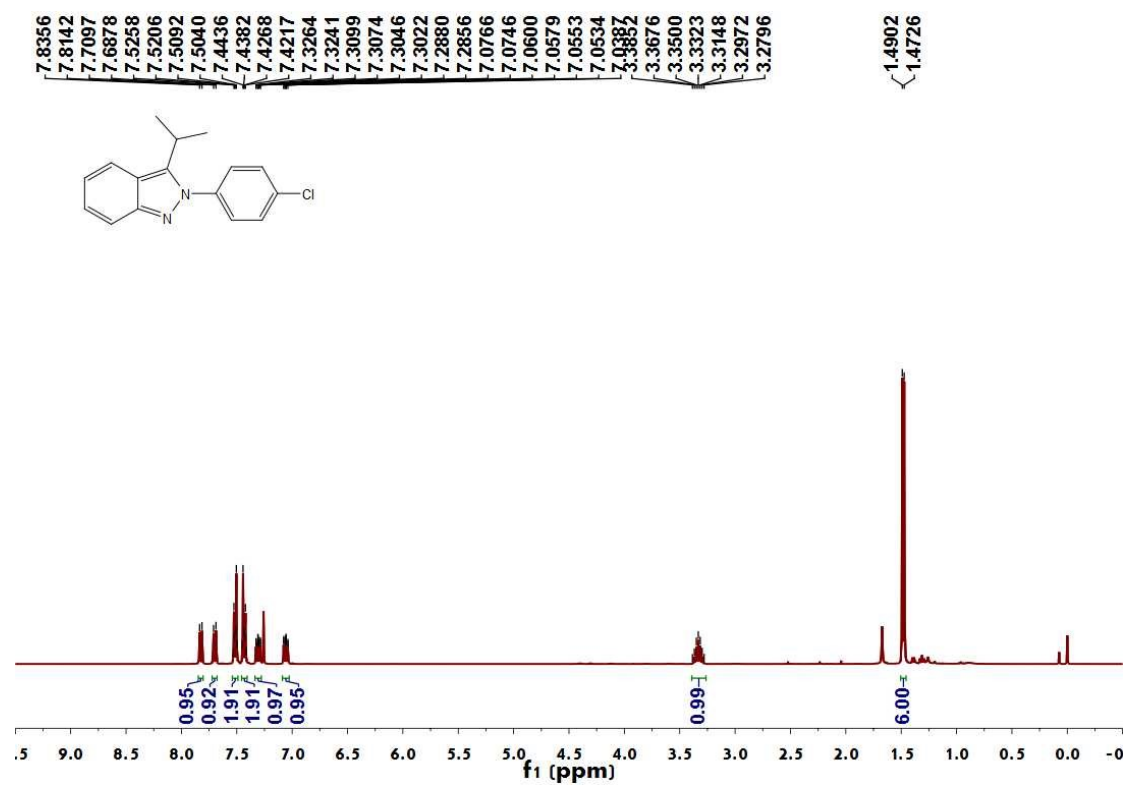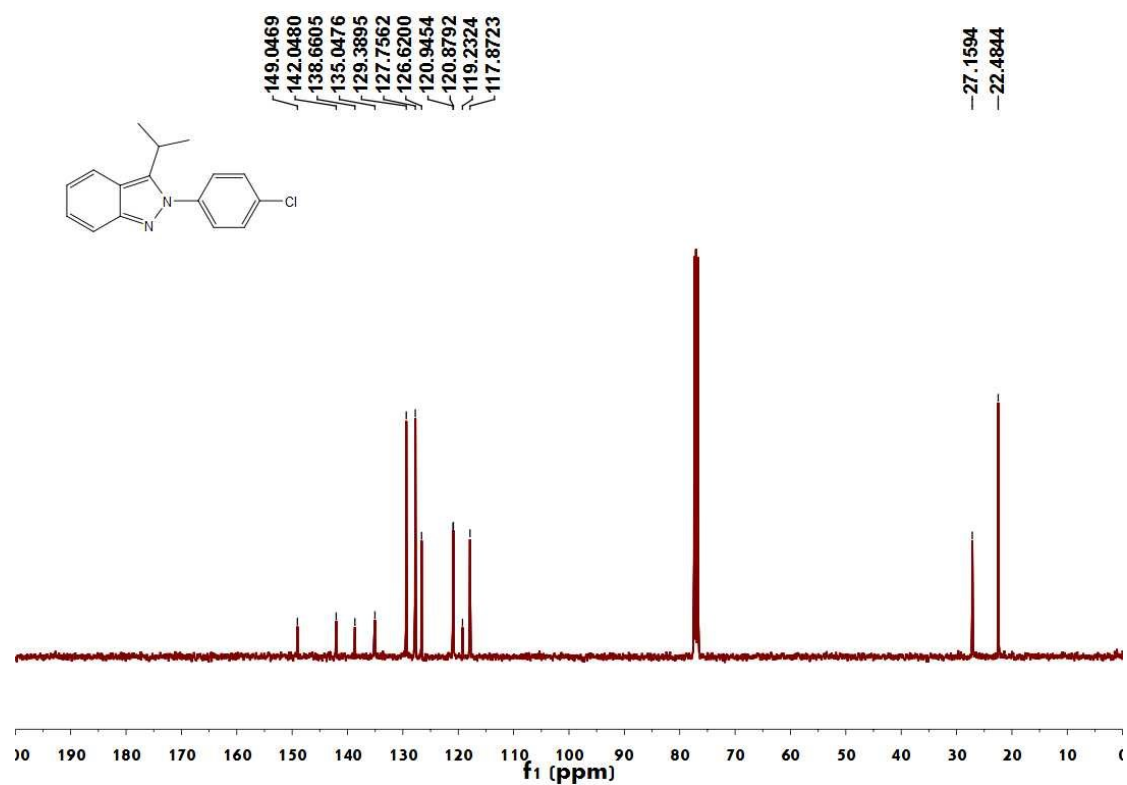

3g

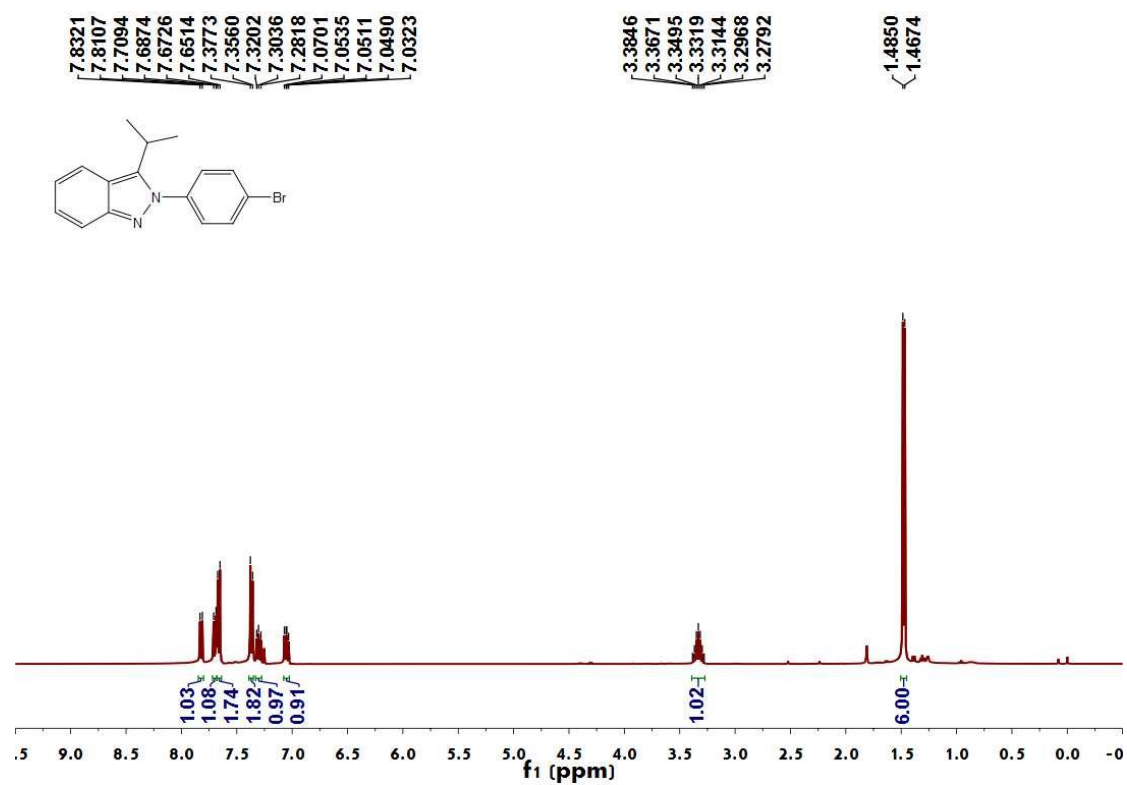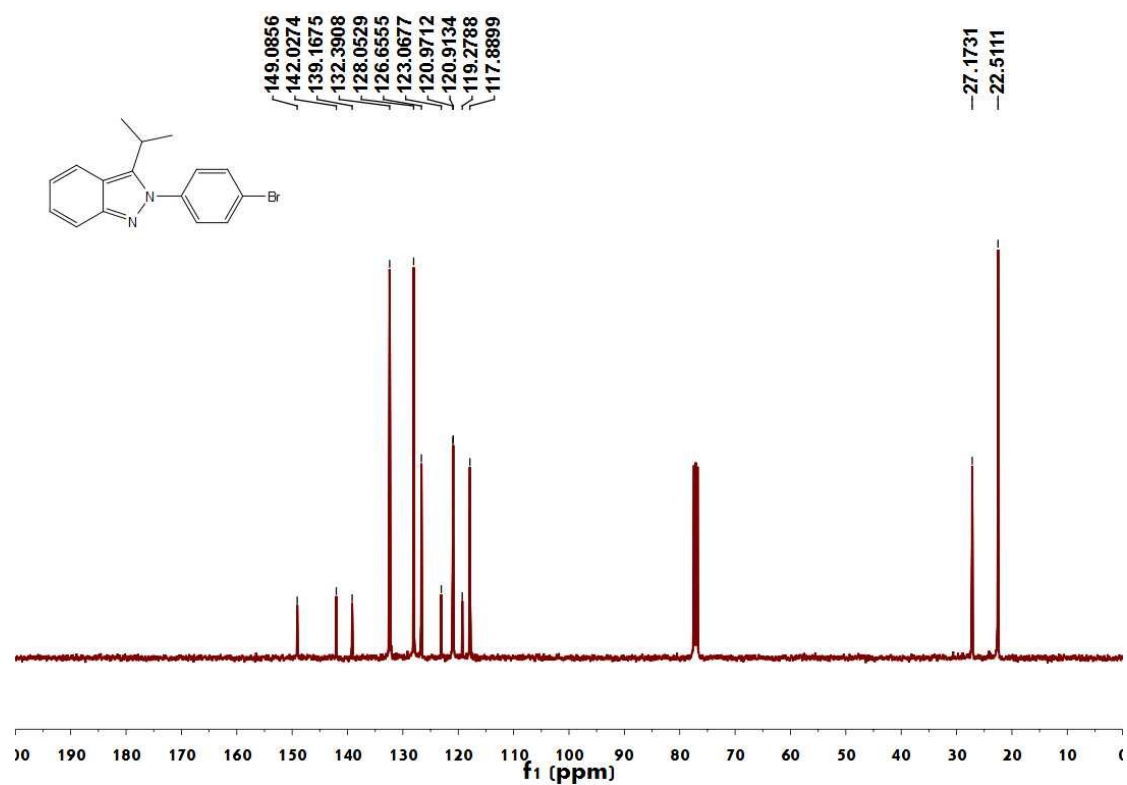

3h

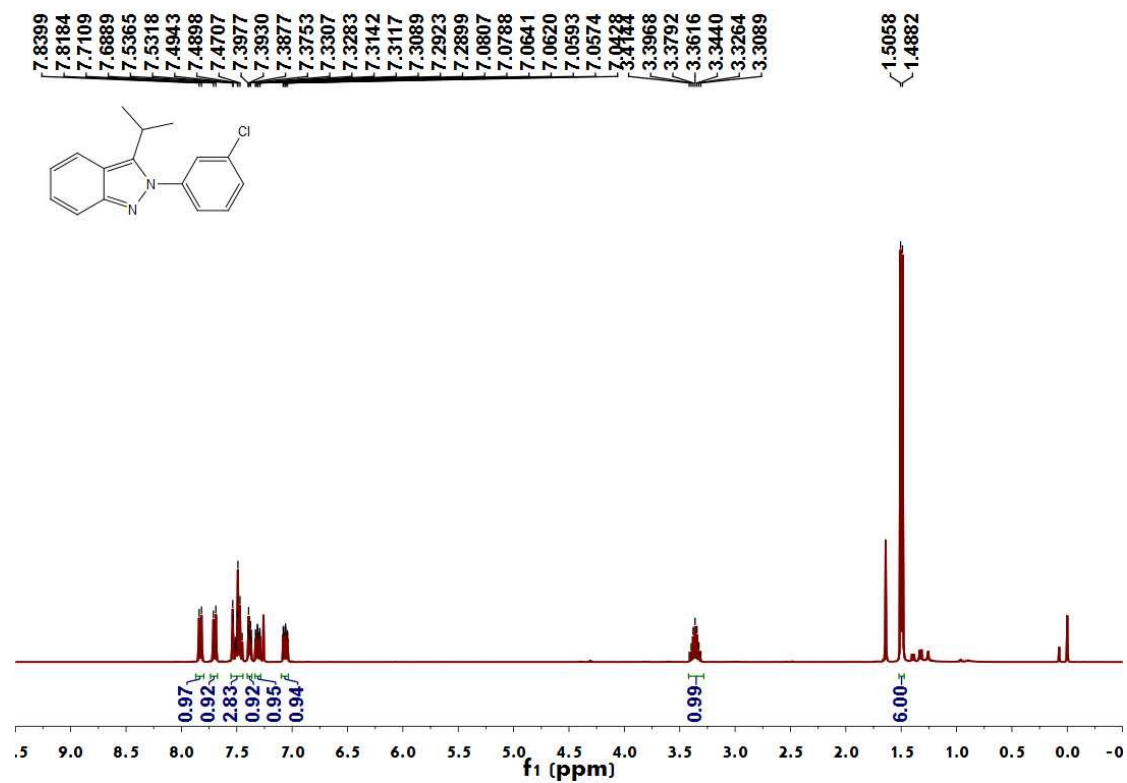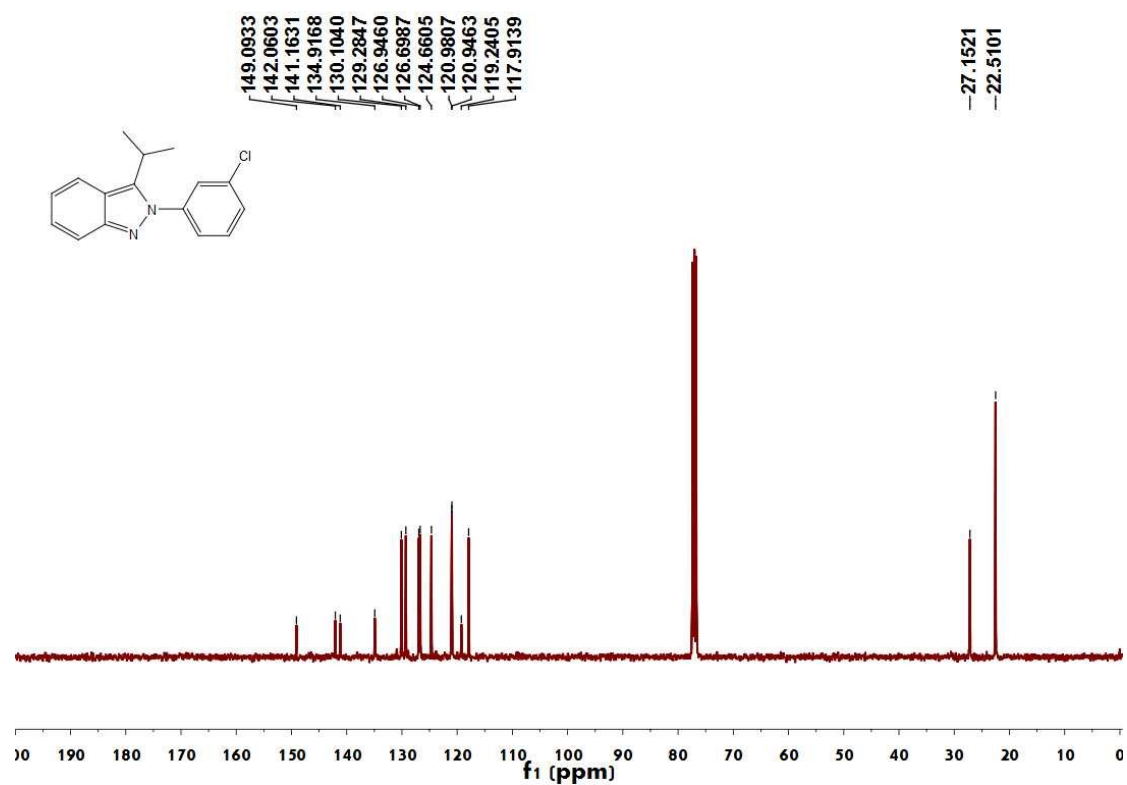

3i

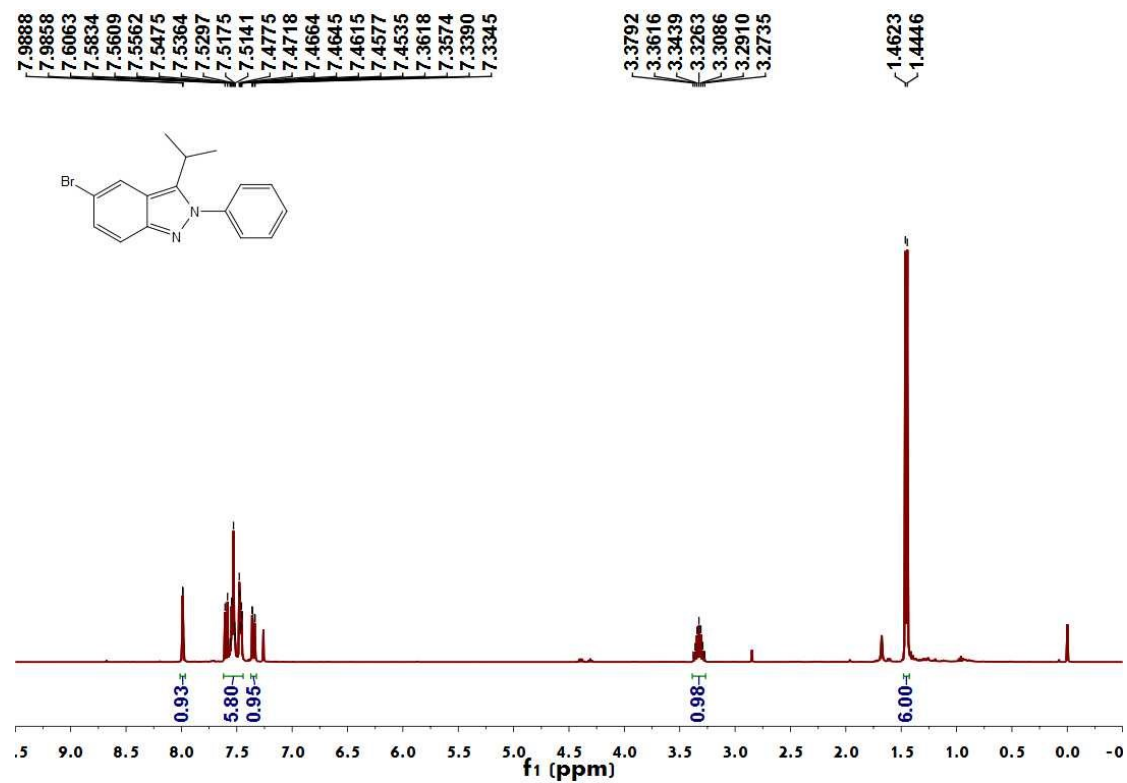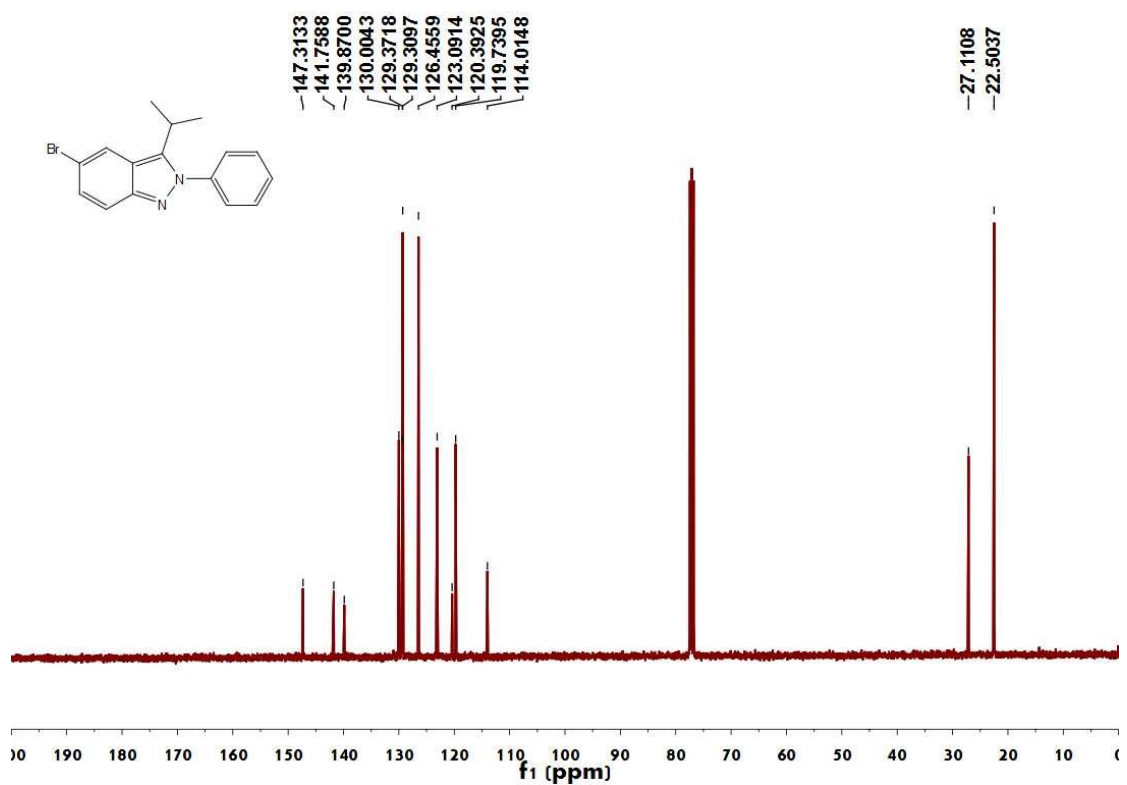

3j

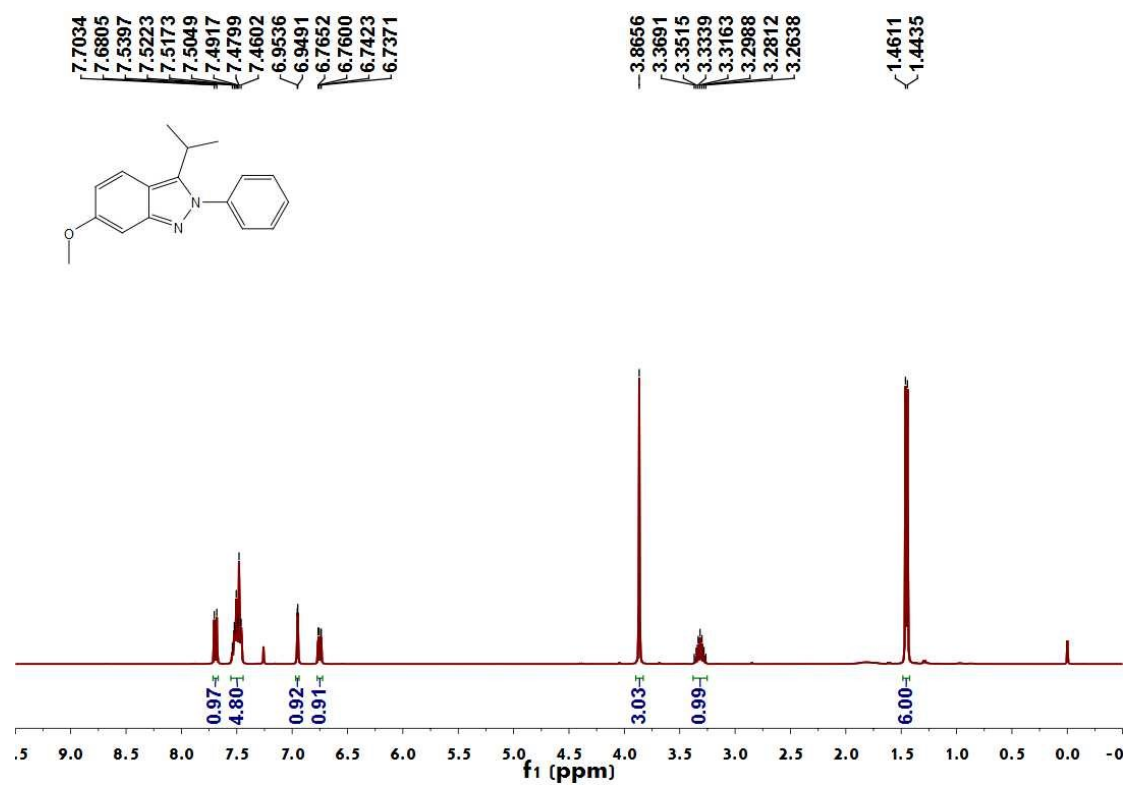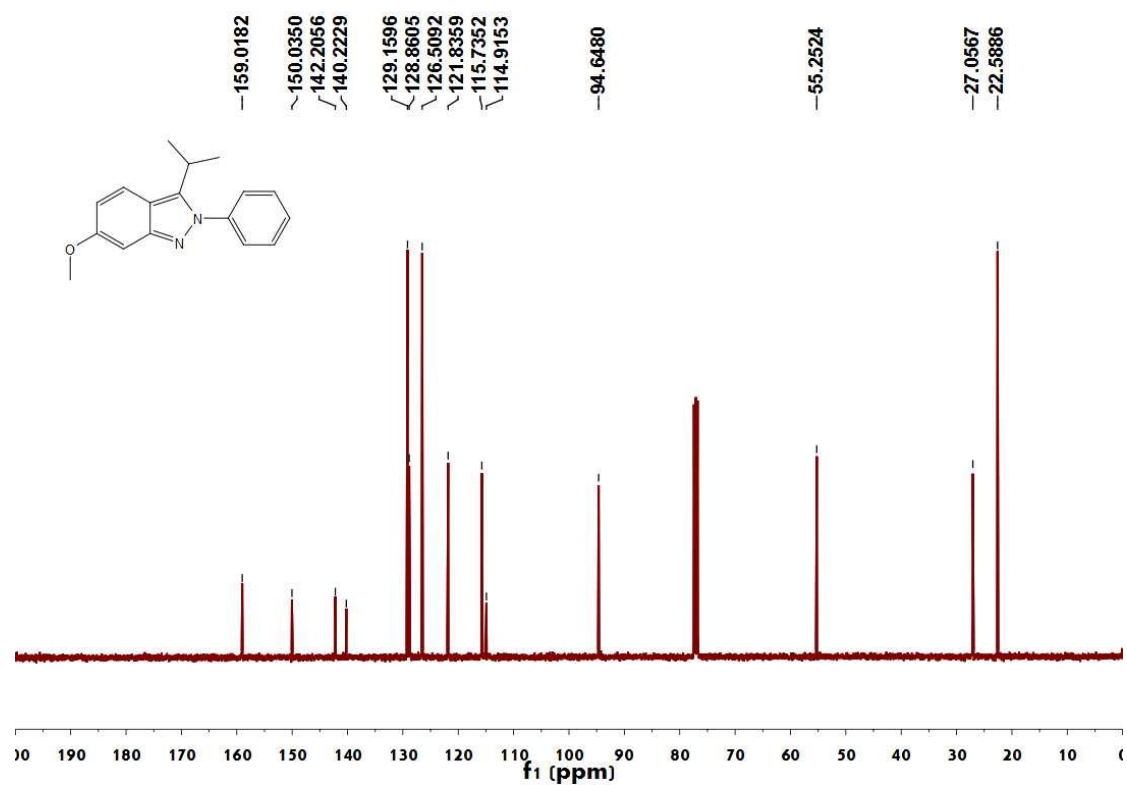

3k

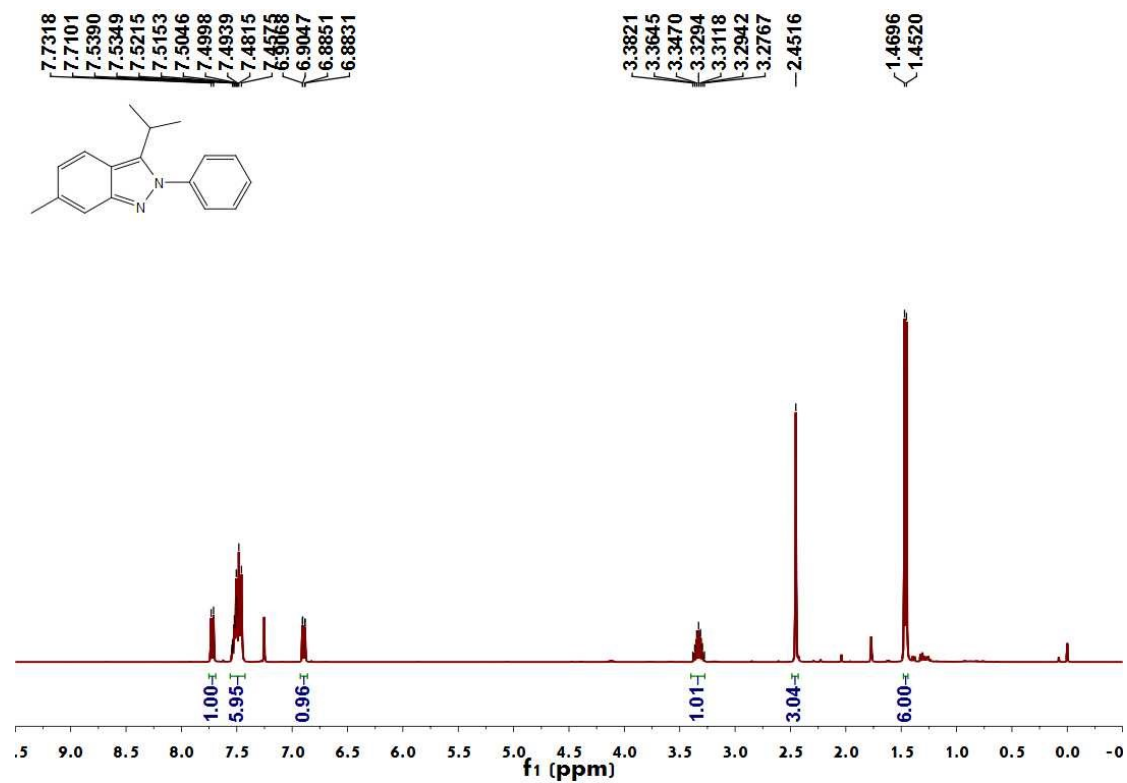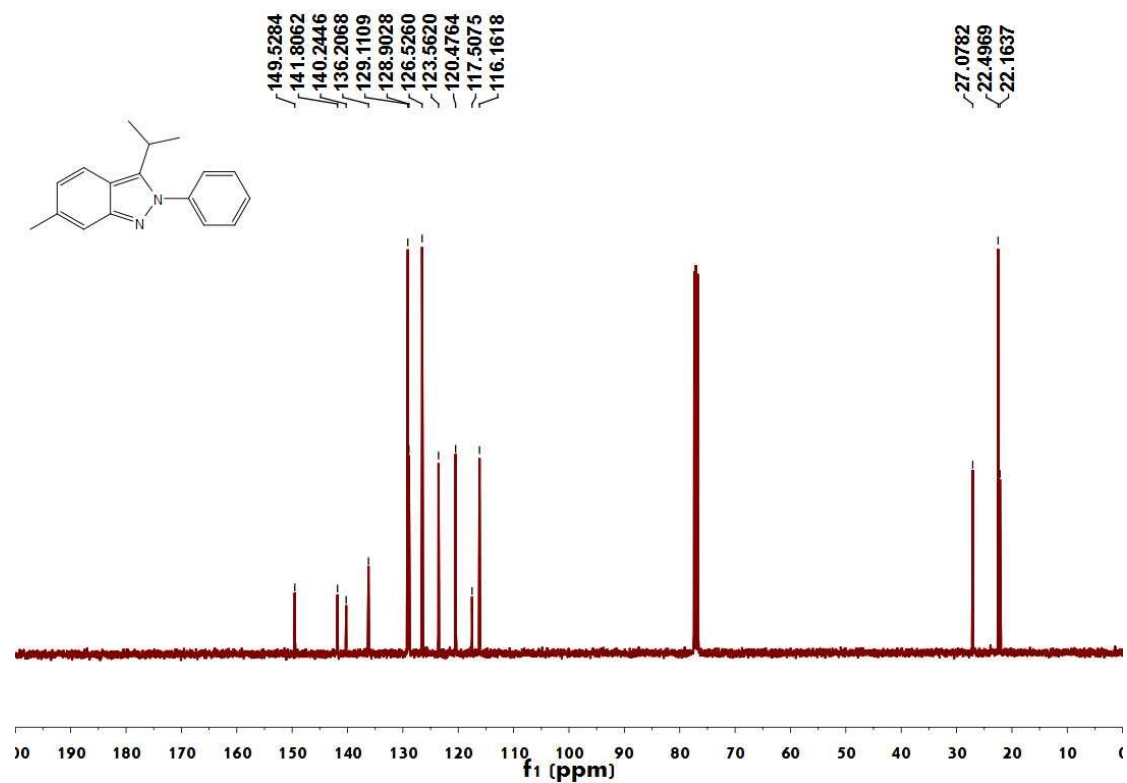

31

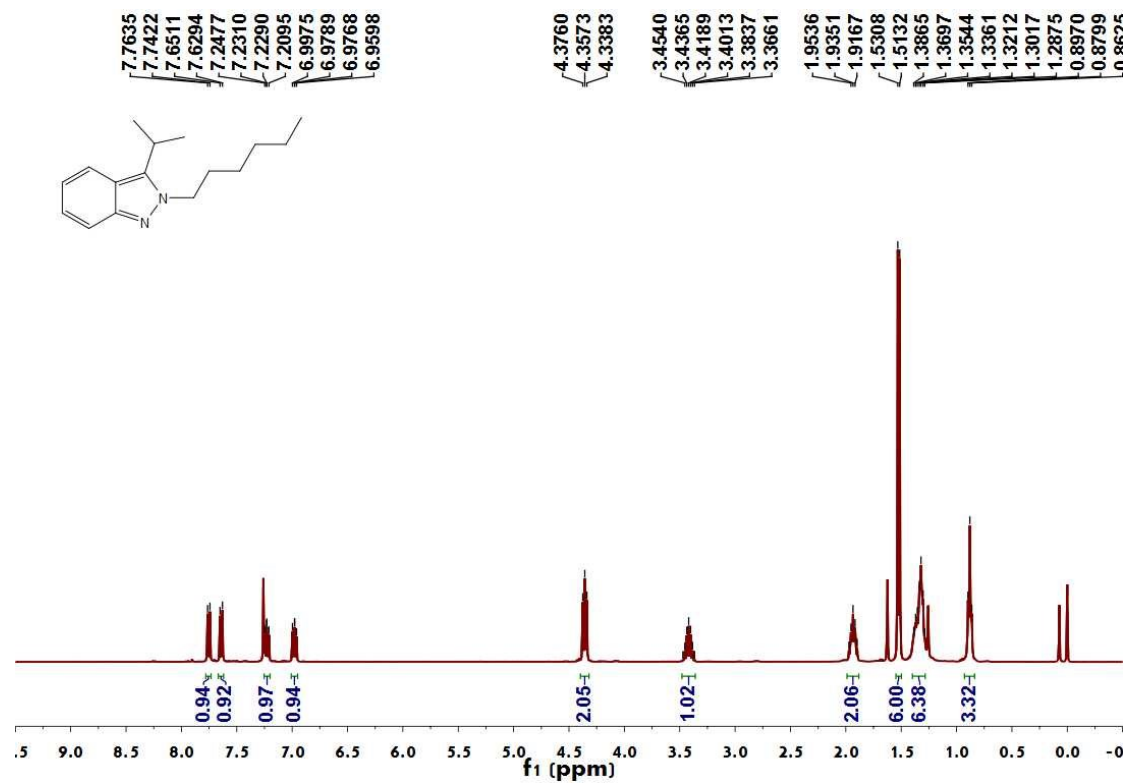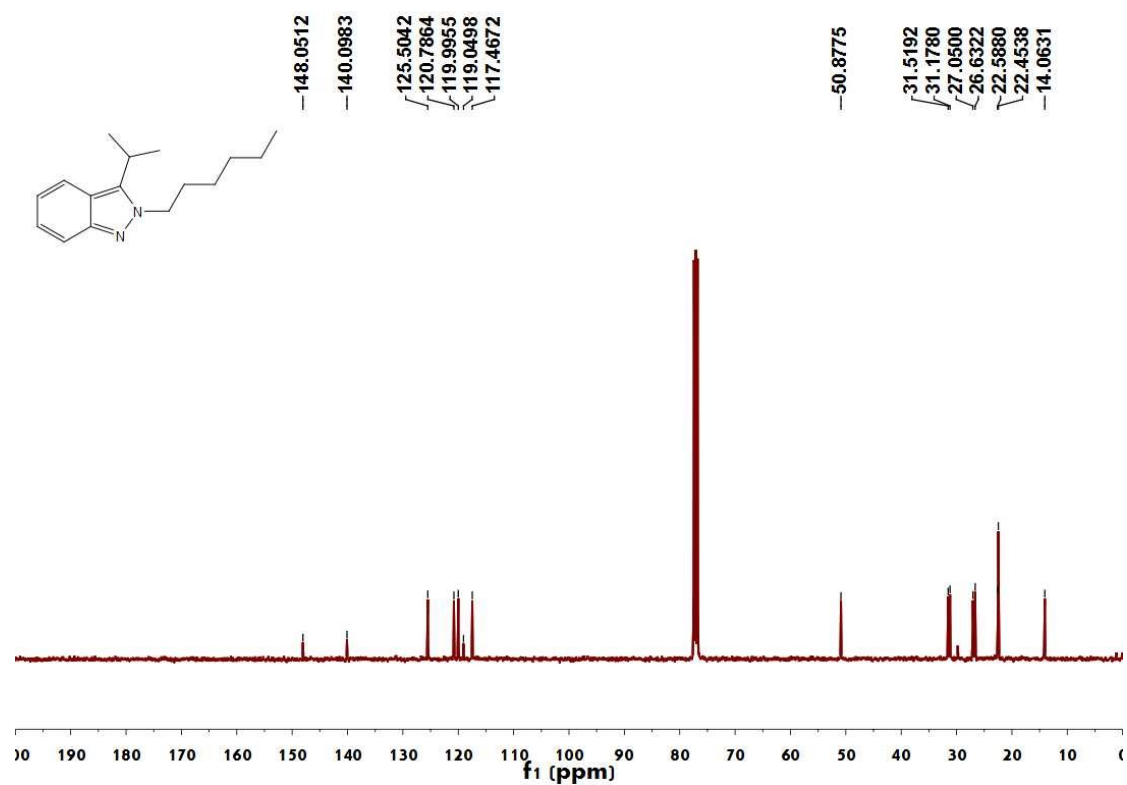

3m

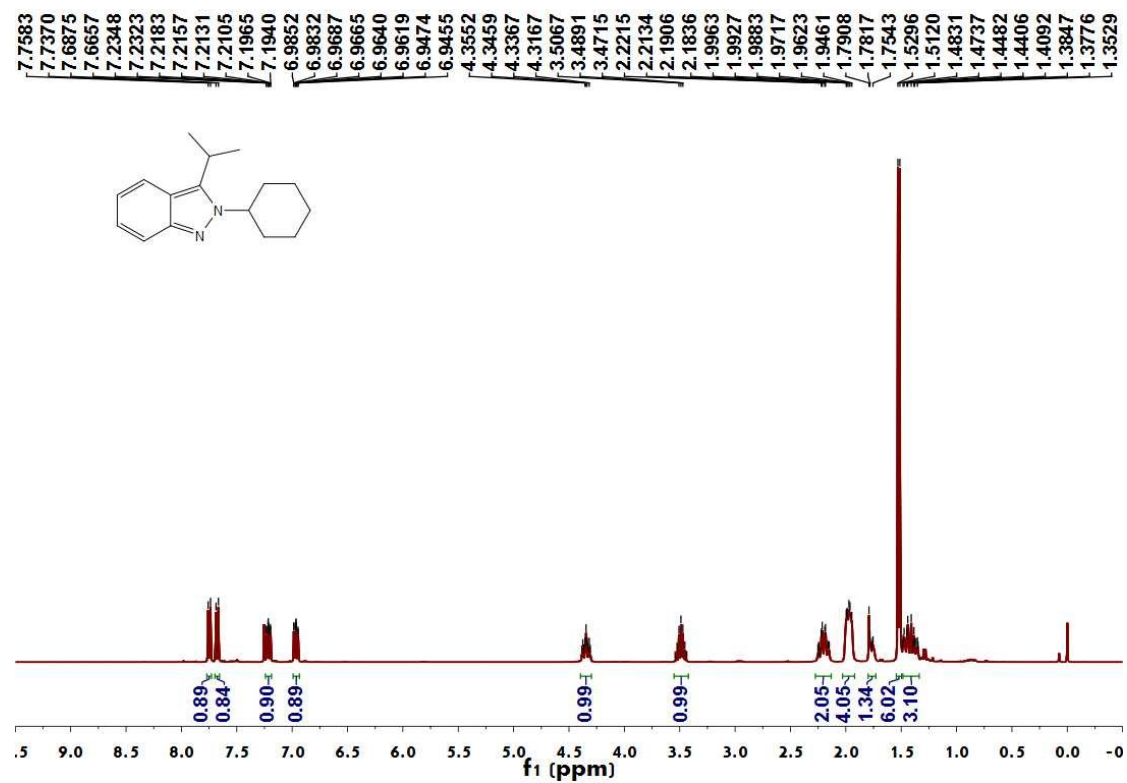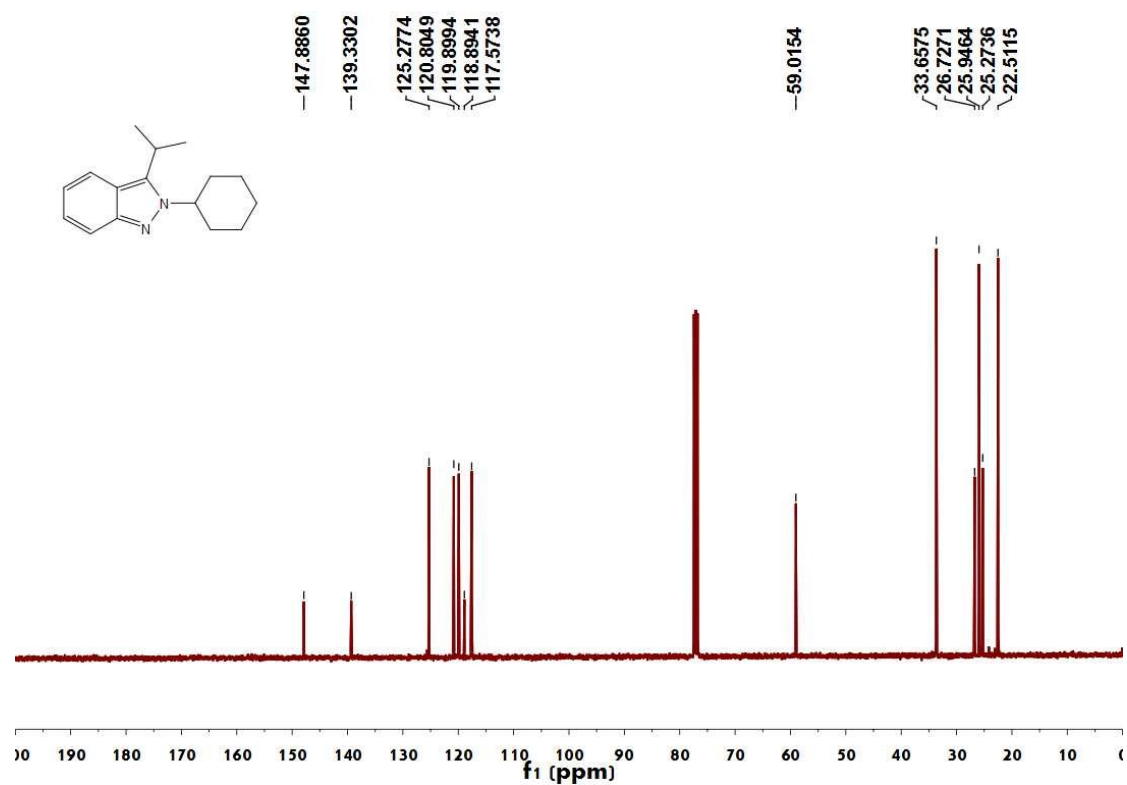



3n

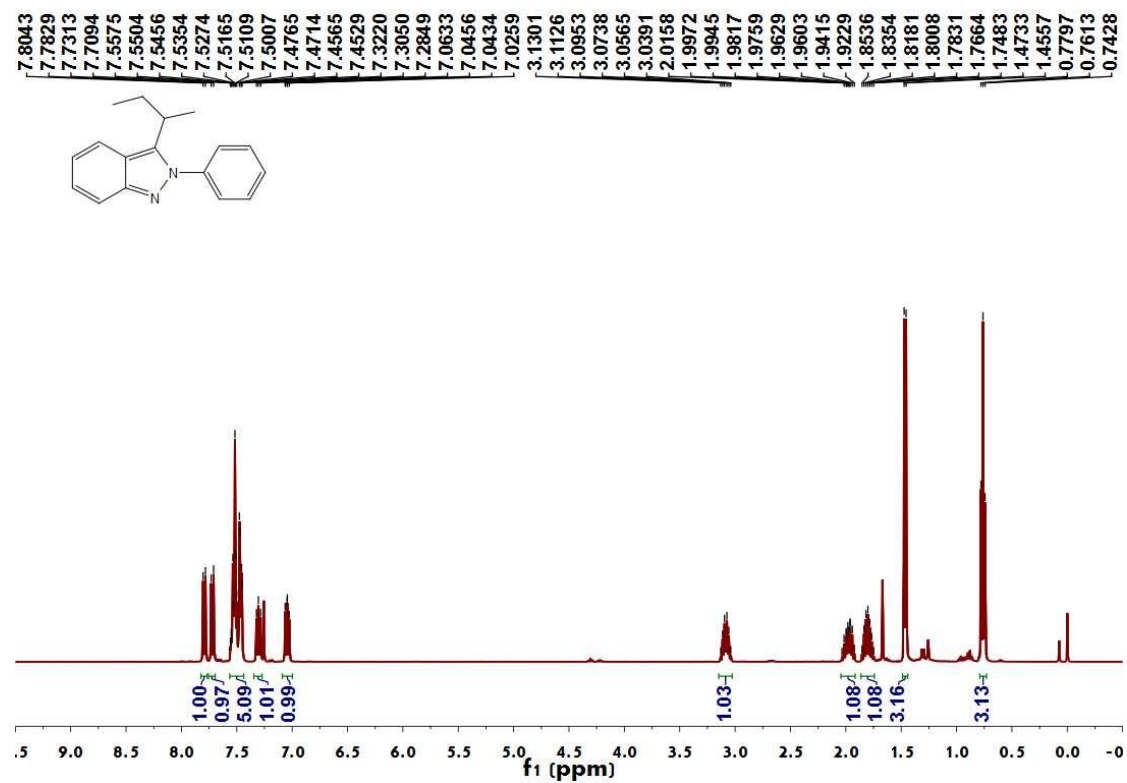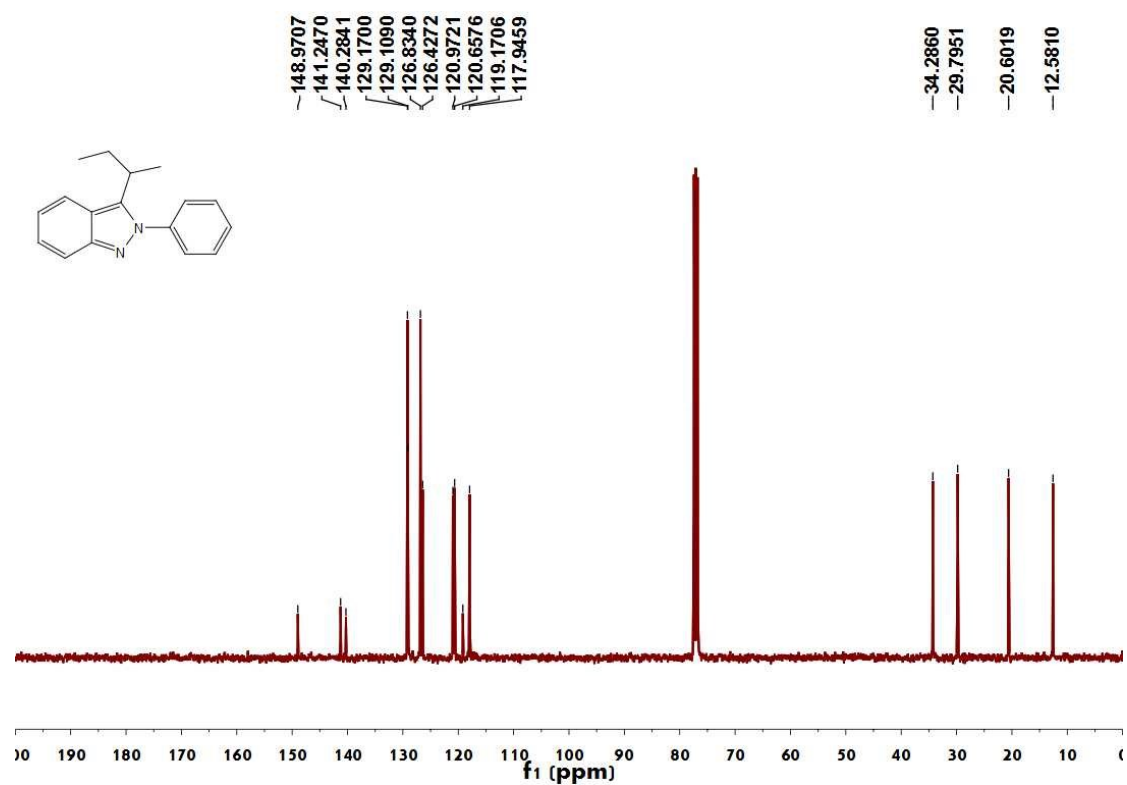

30

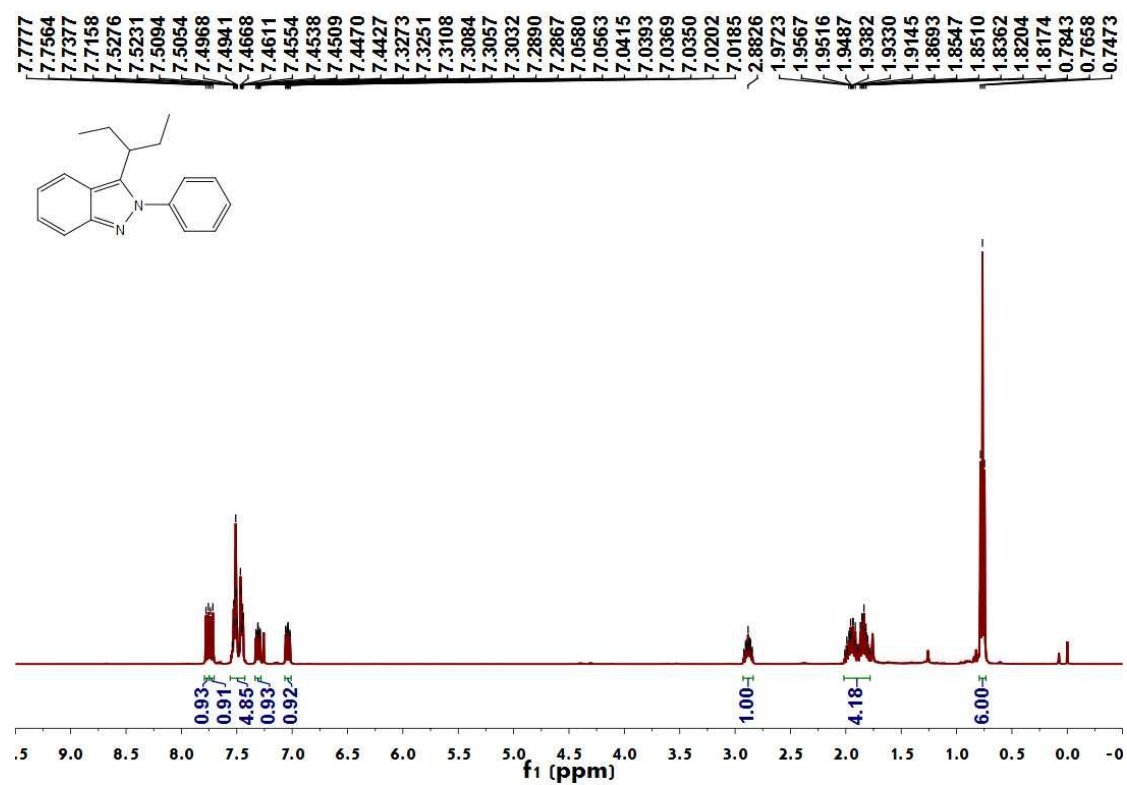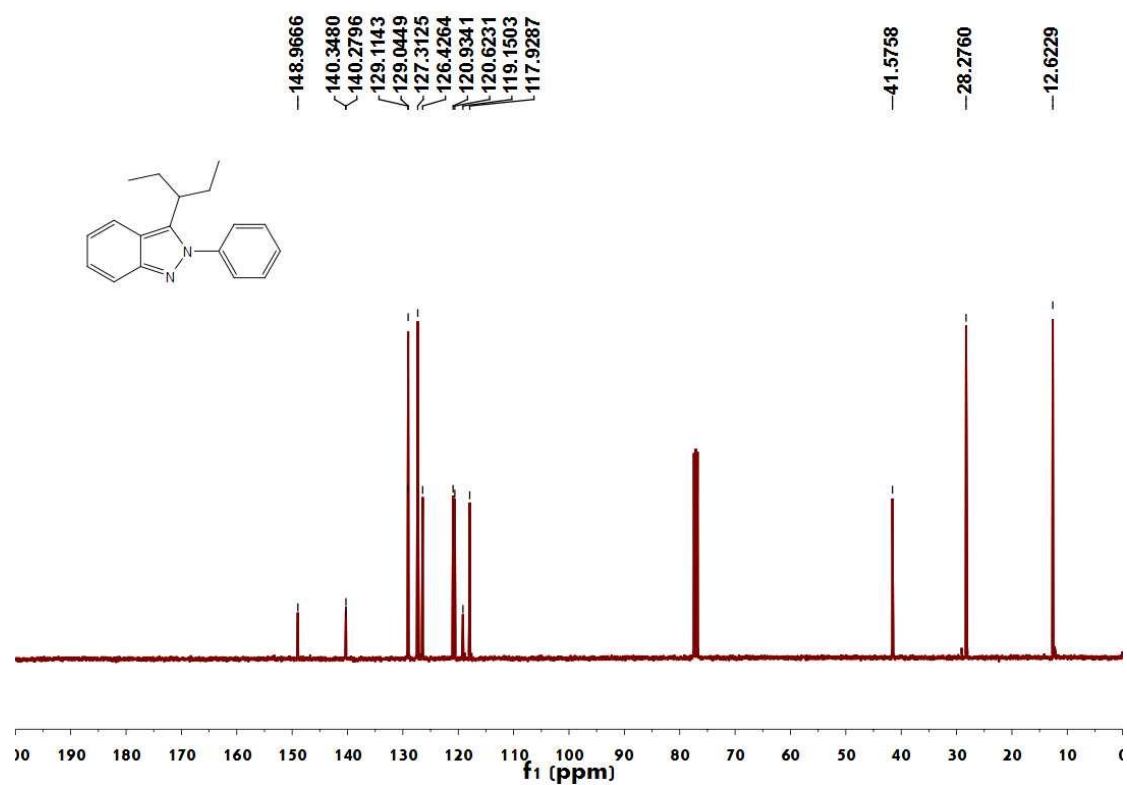

3p

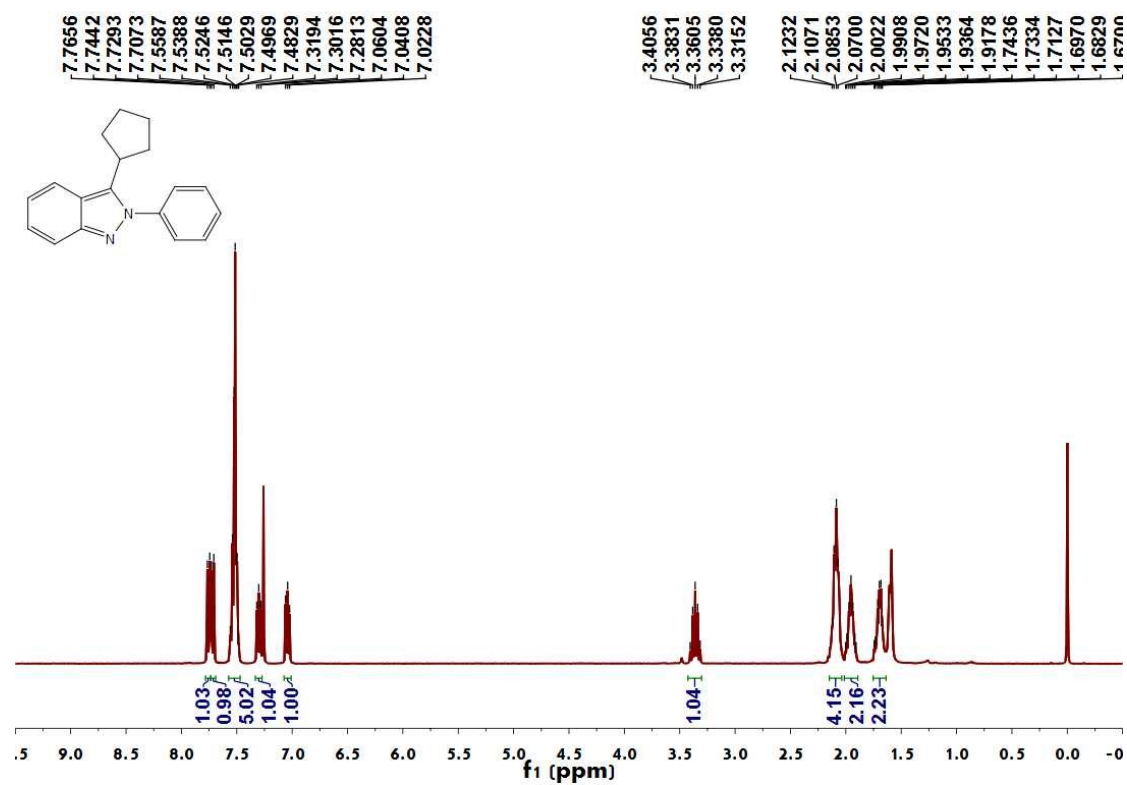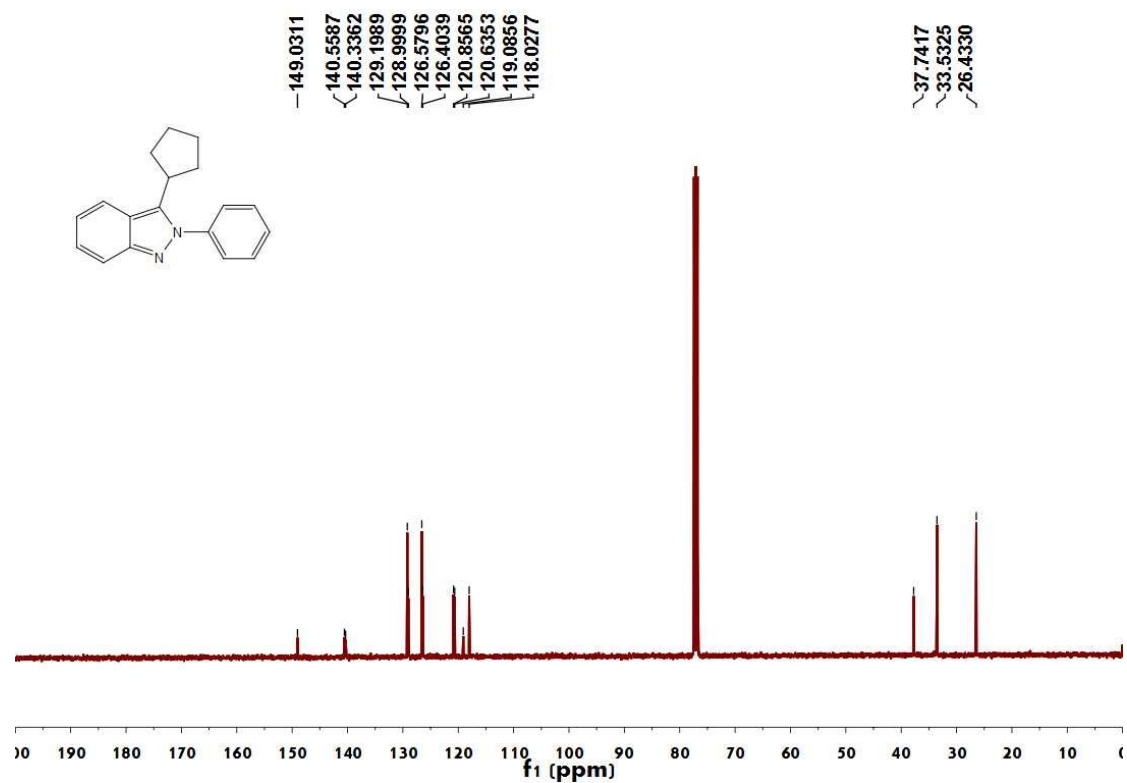

3q

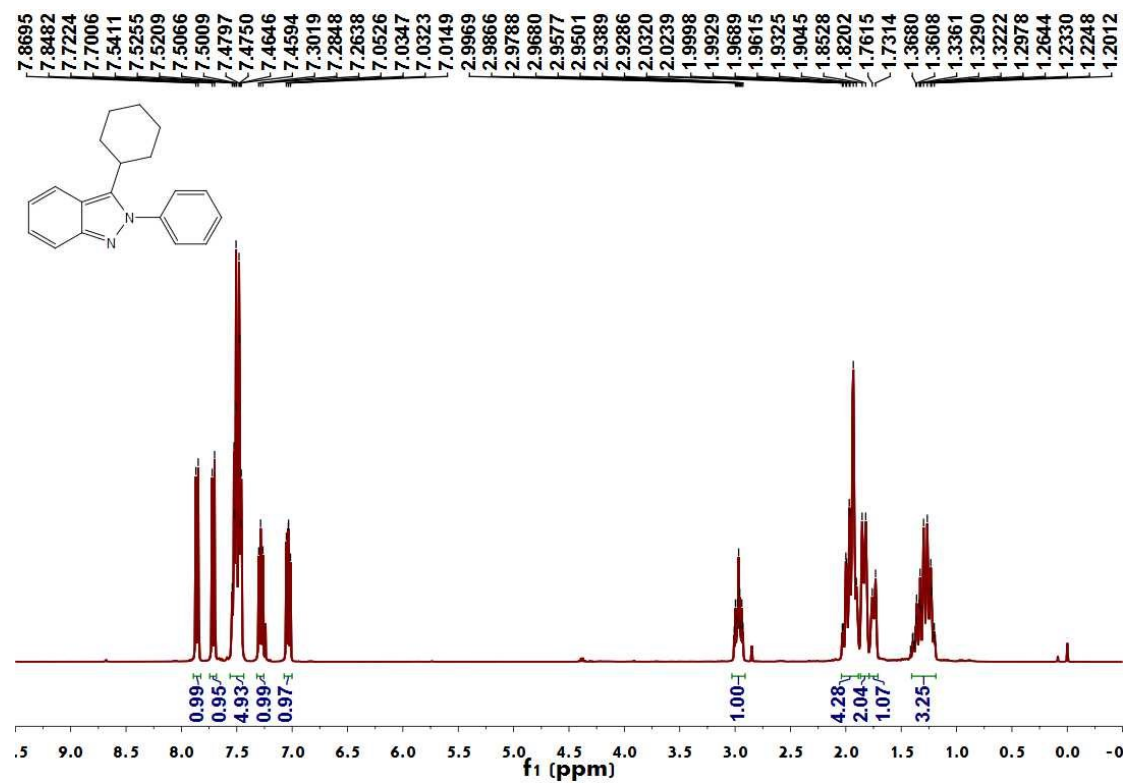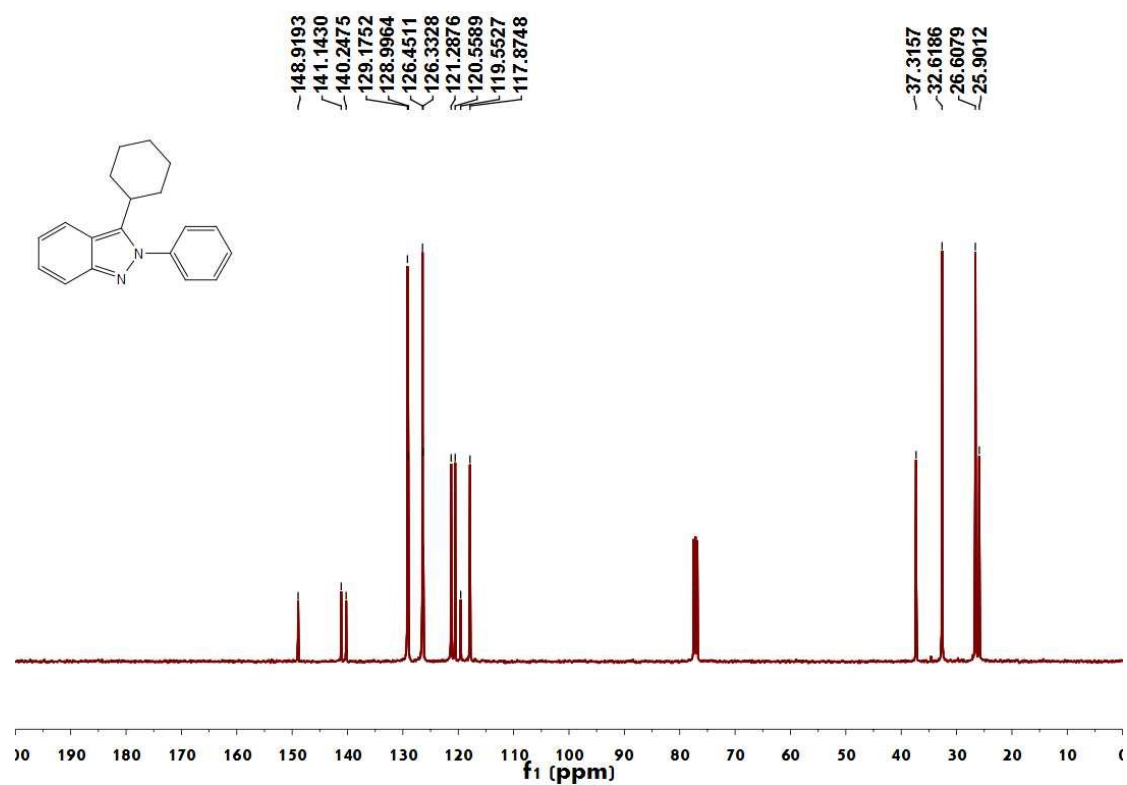

3r

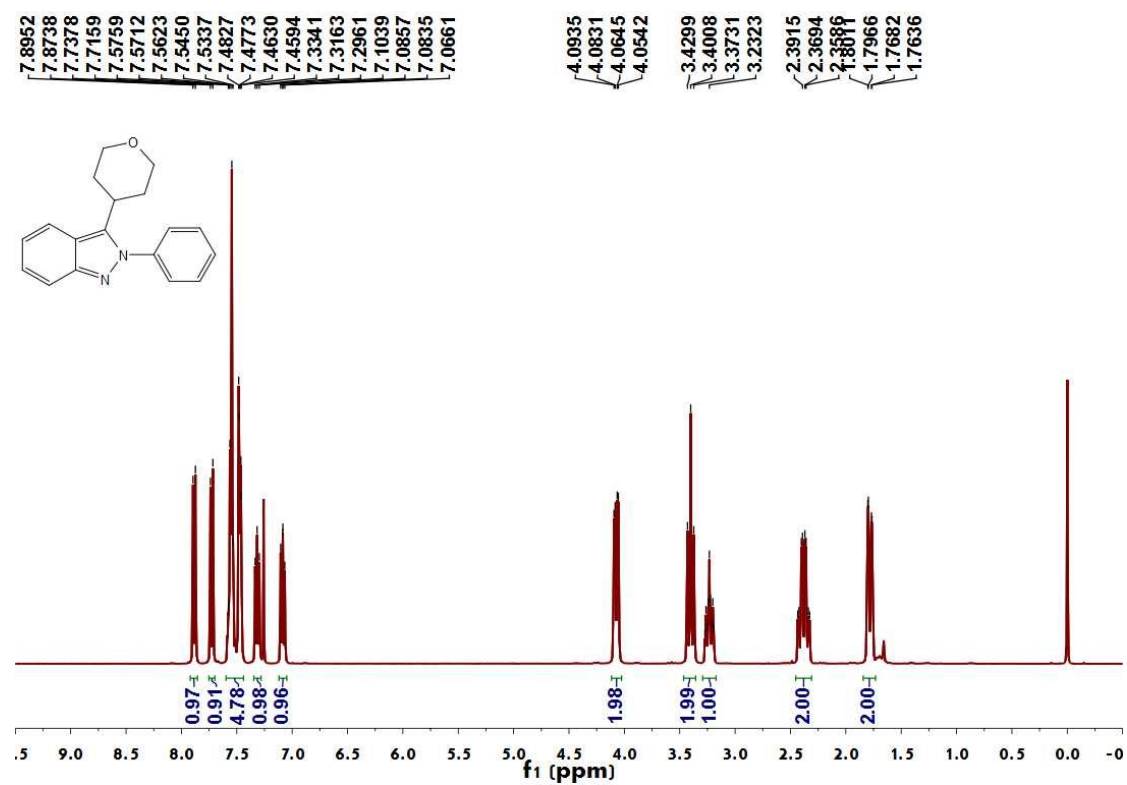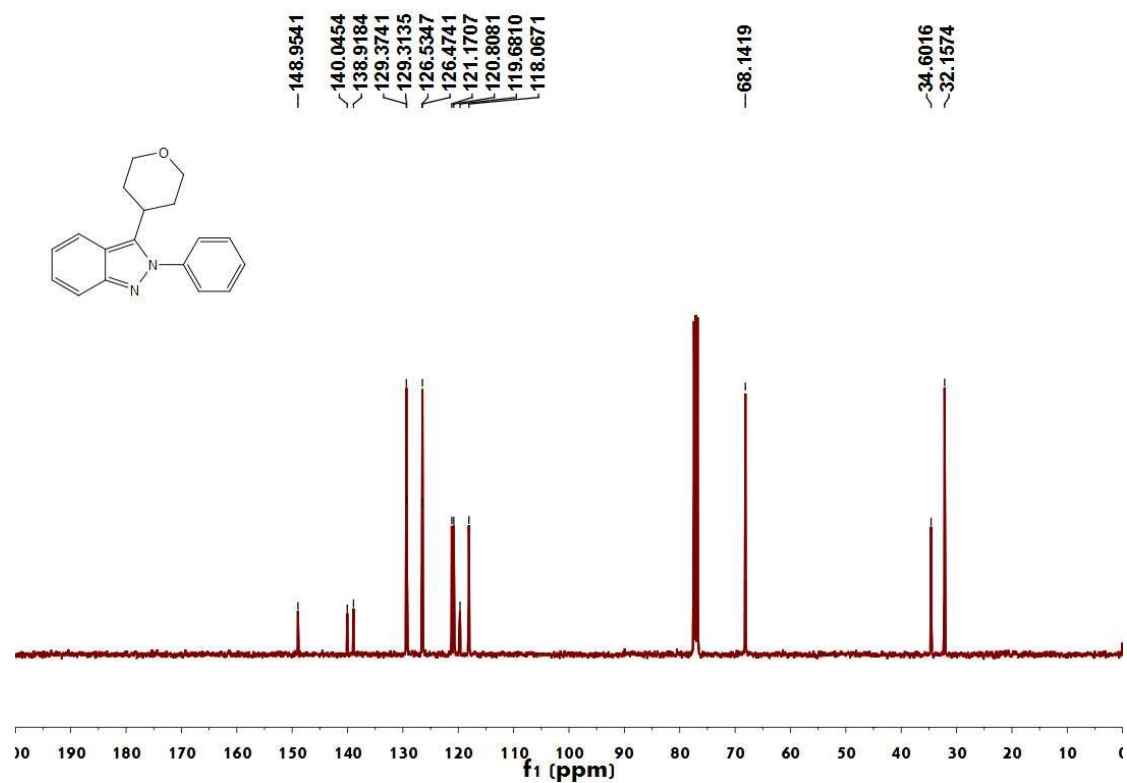

3s

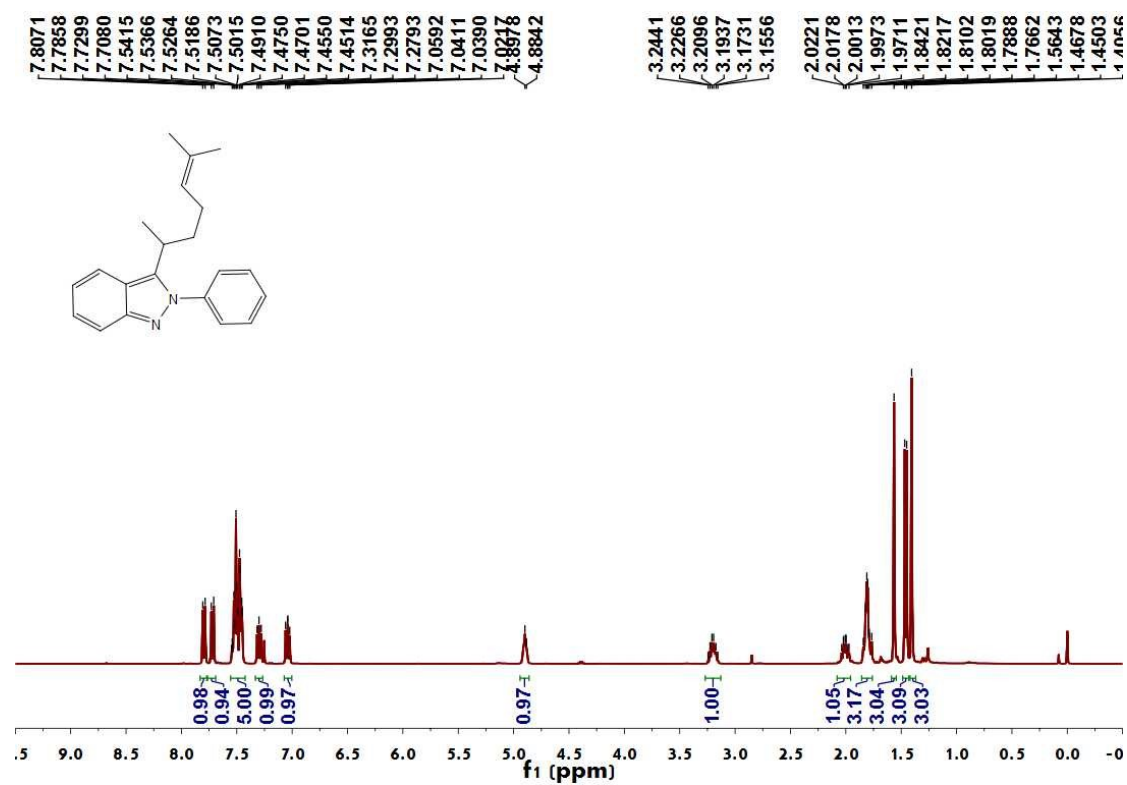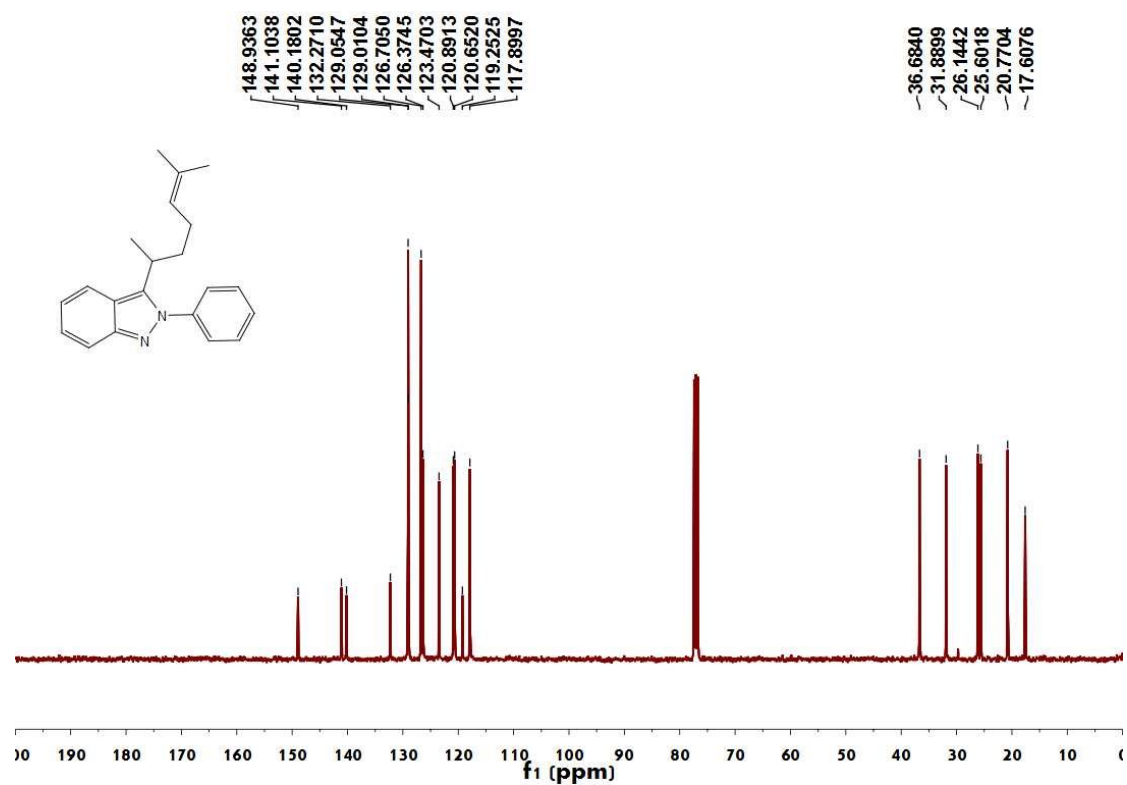

3t

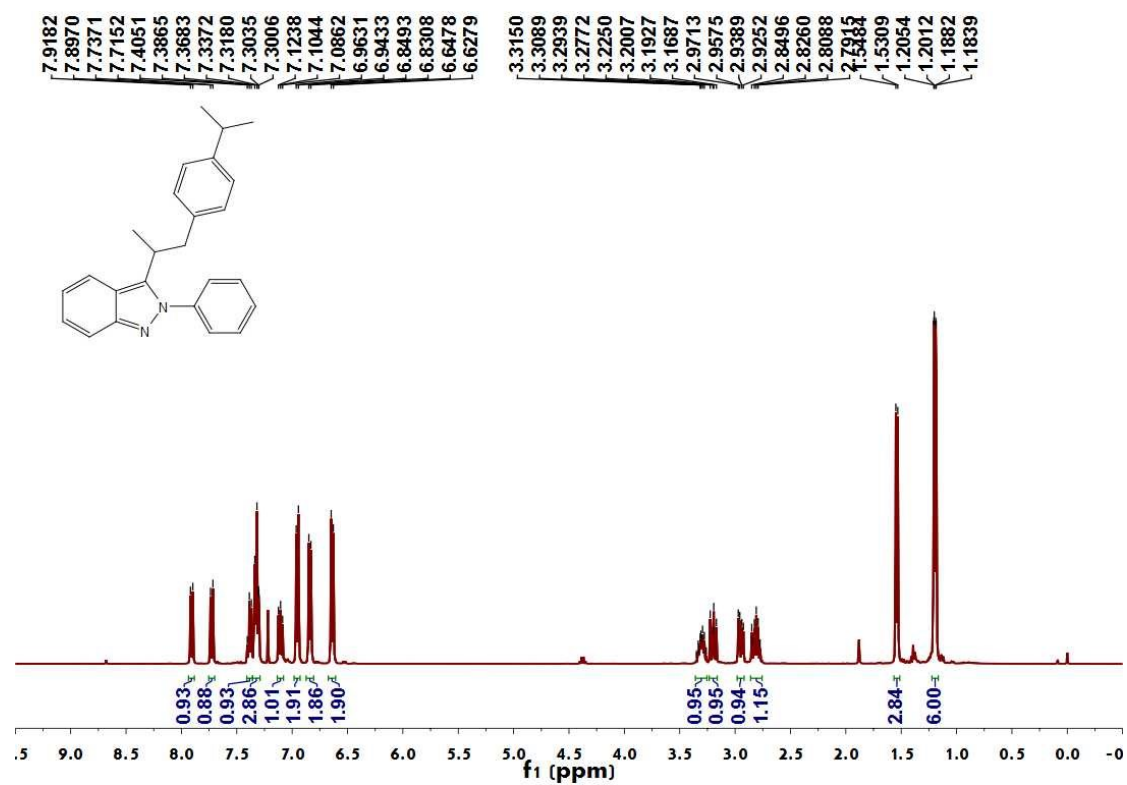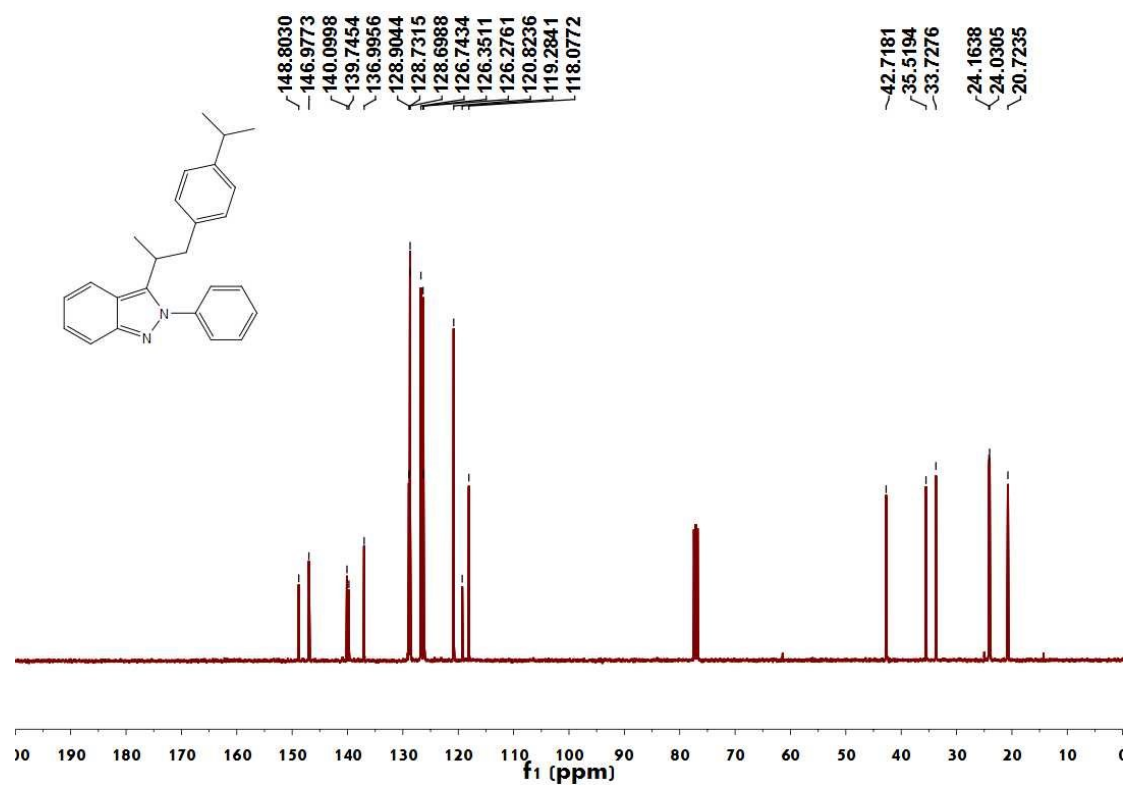

3u

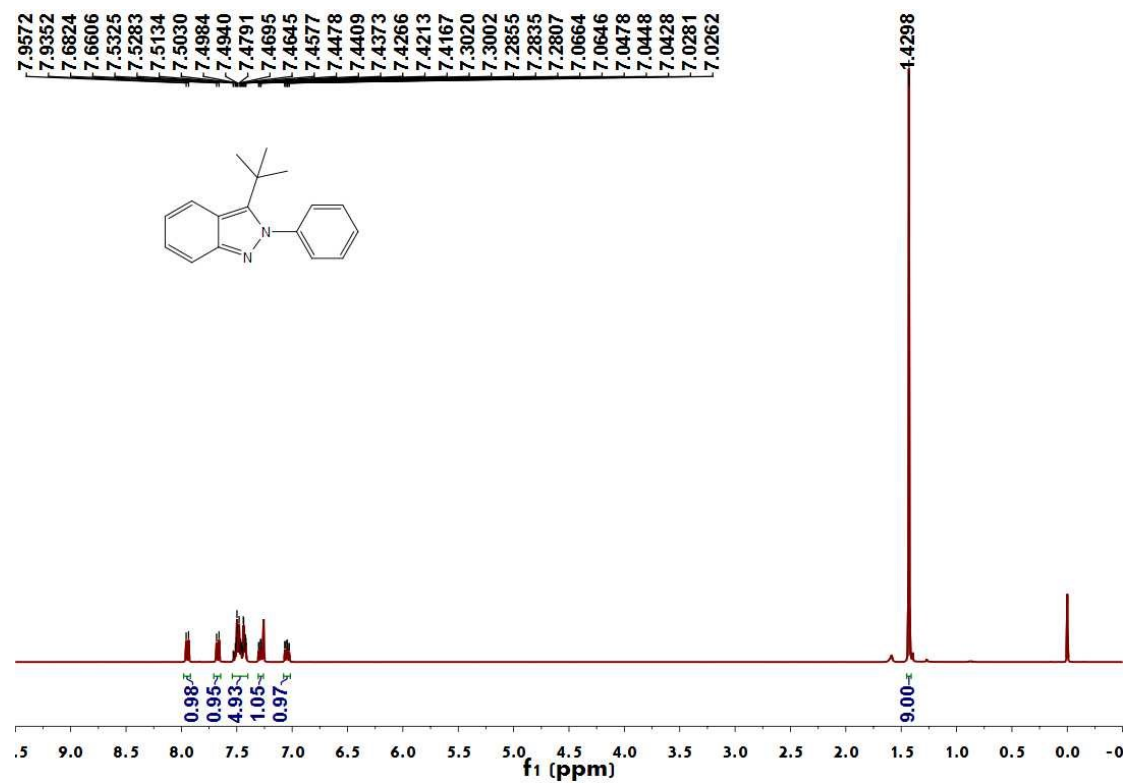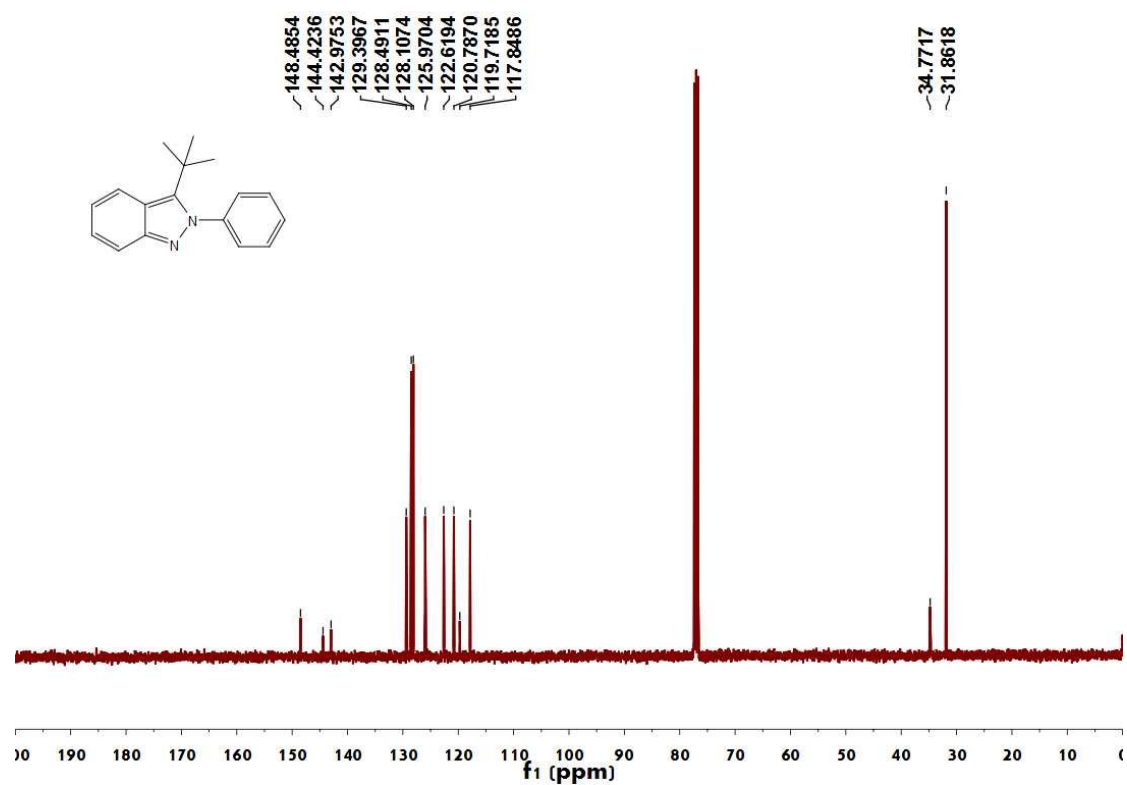



5a

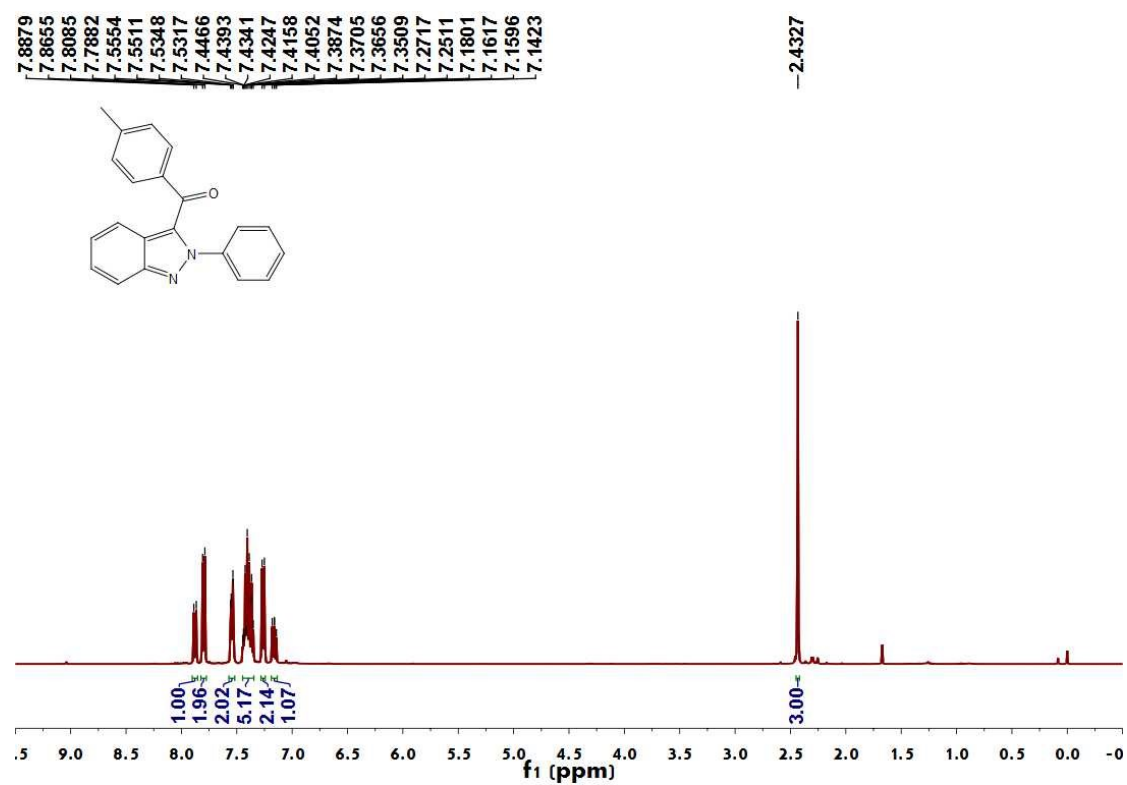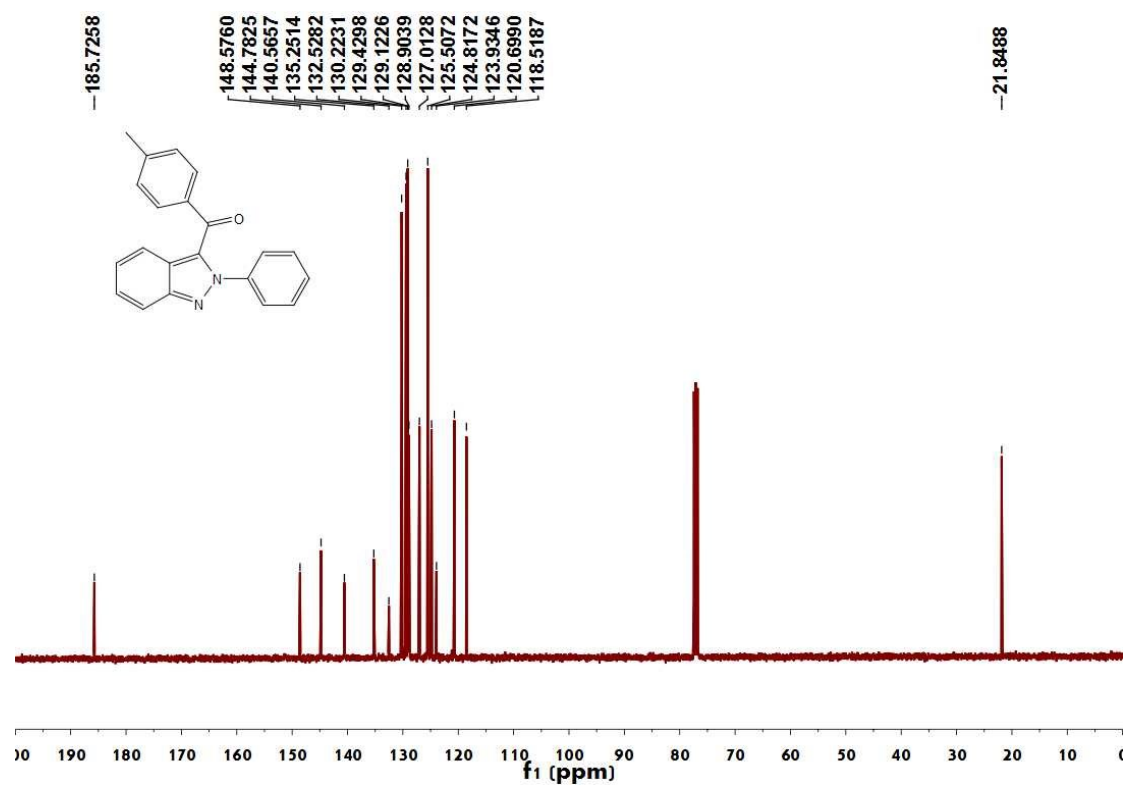

5b

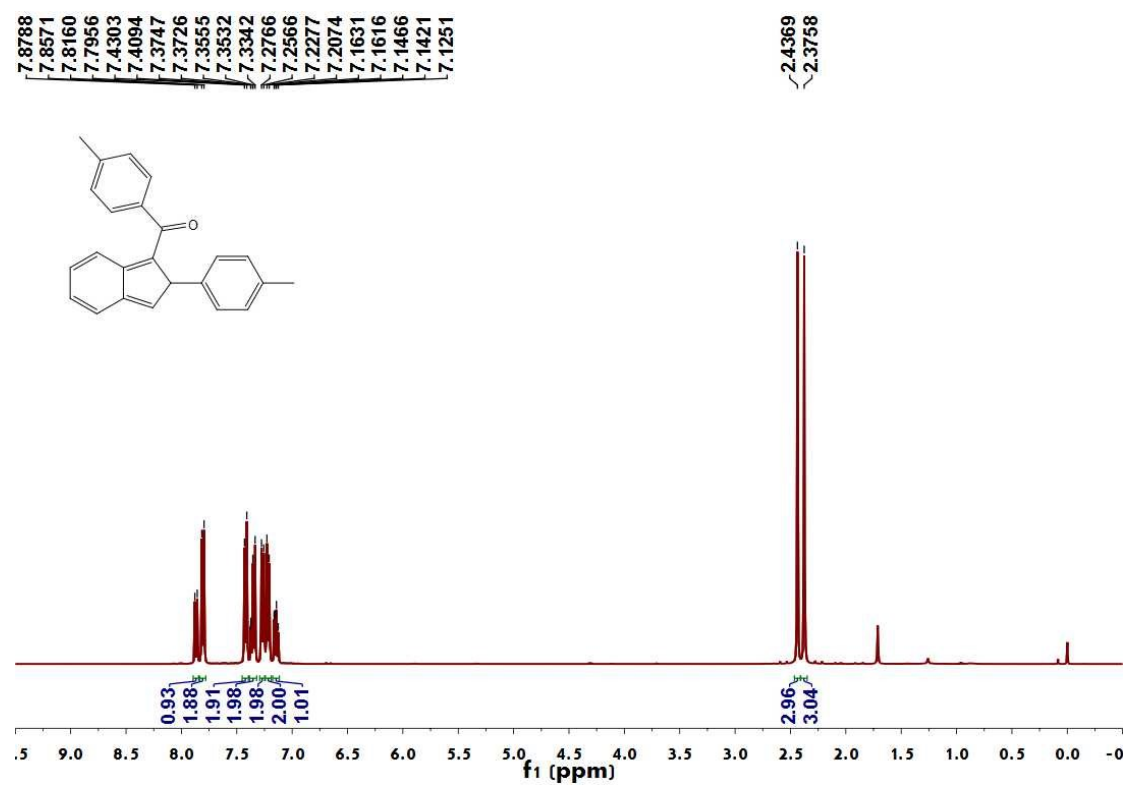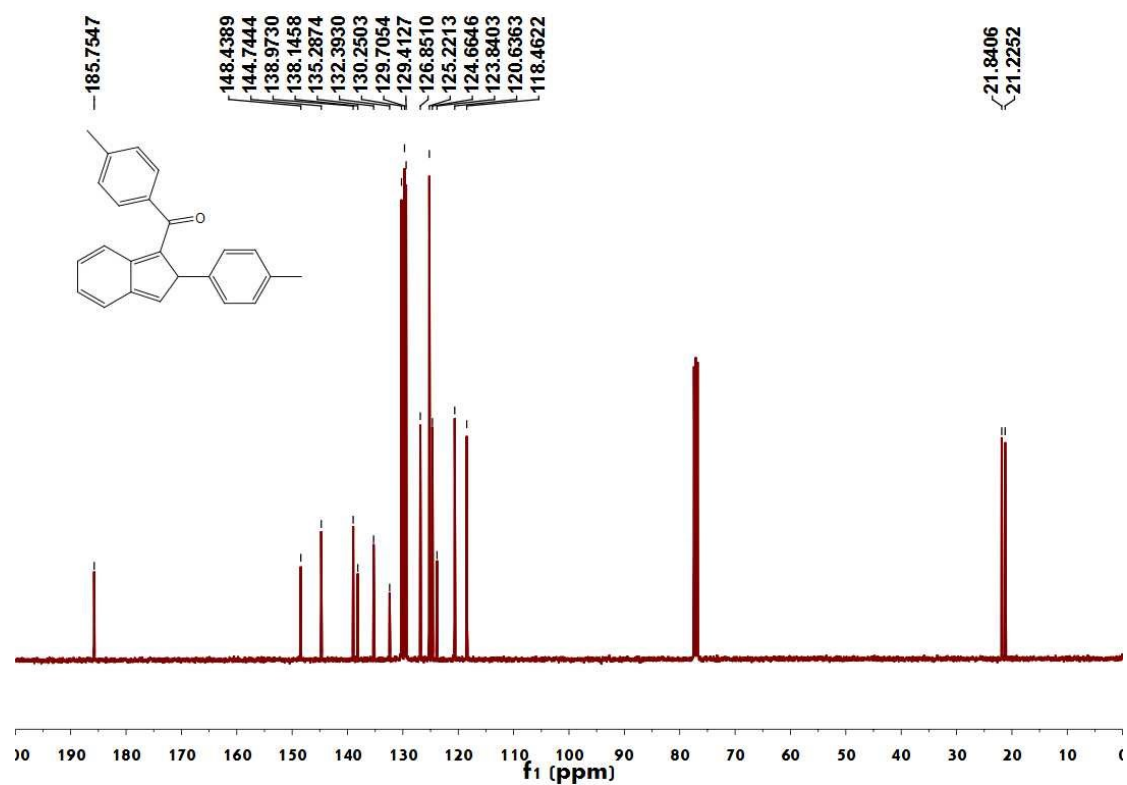

5c

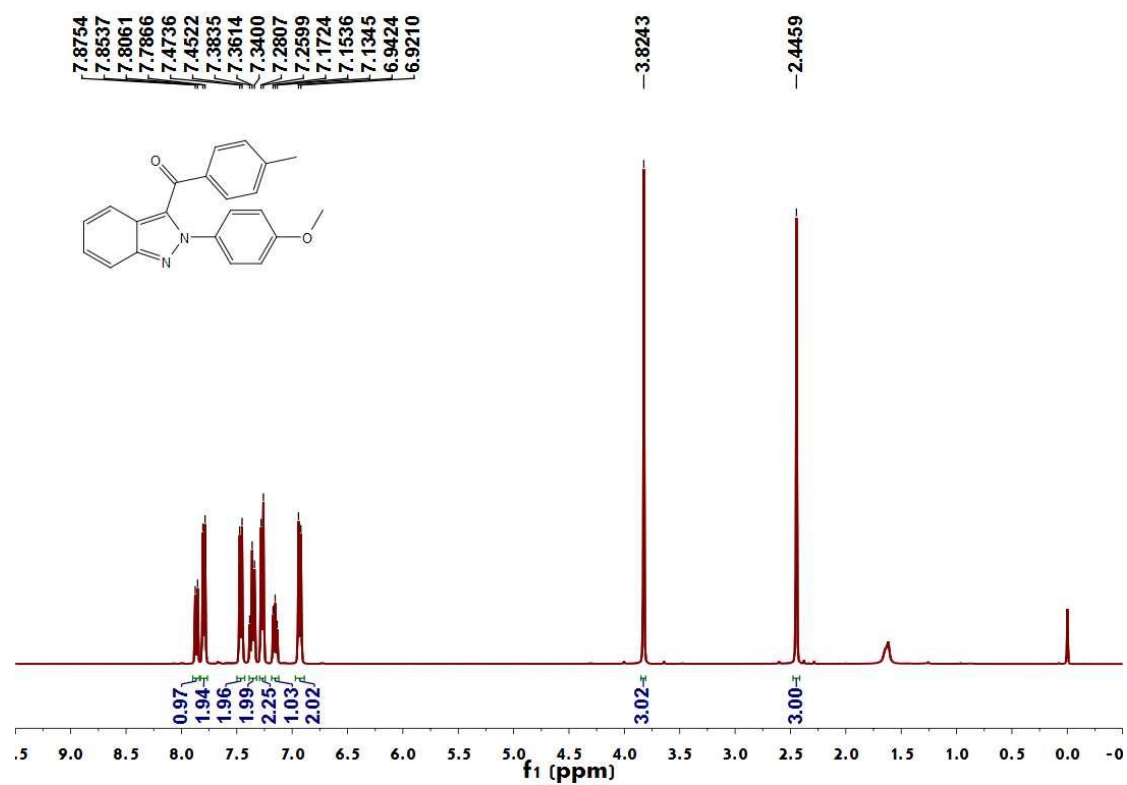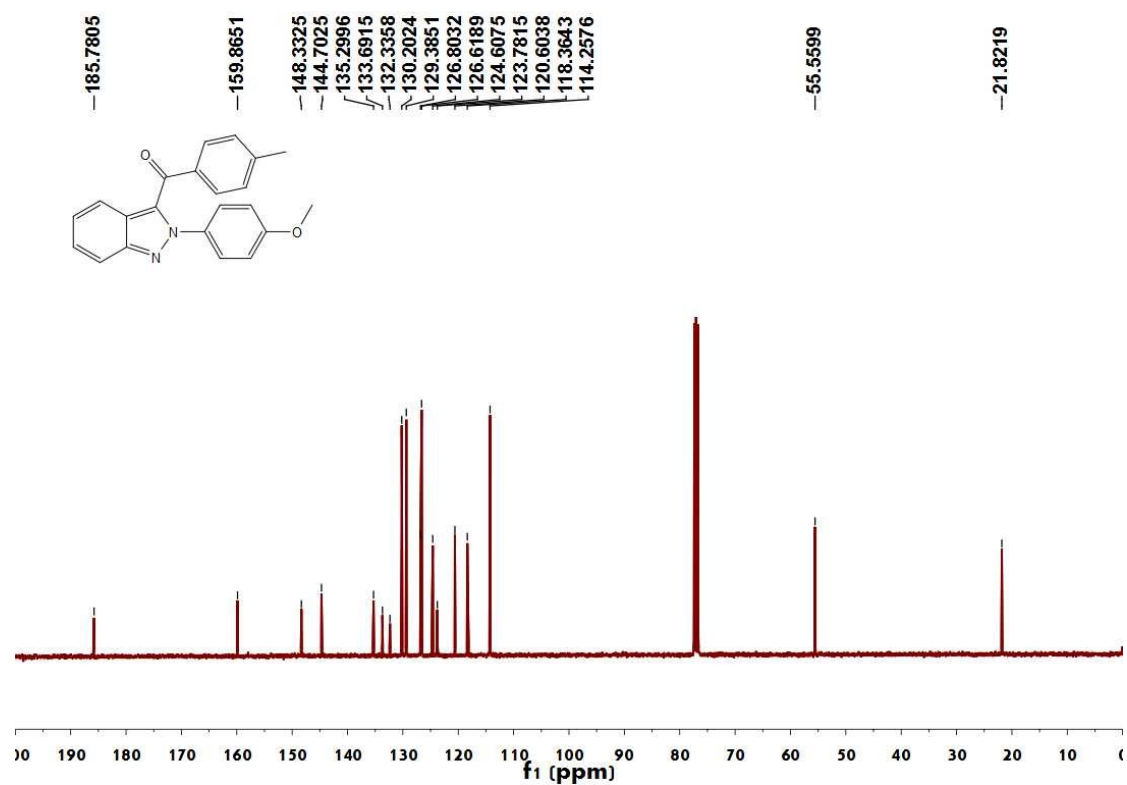

5d

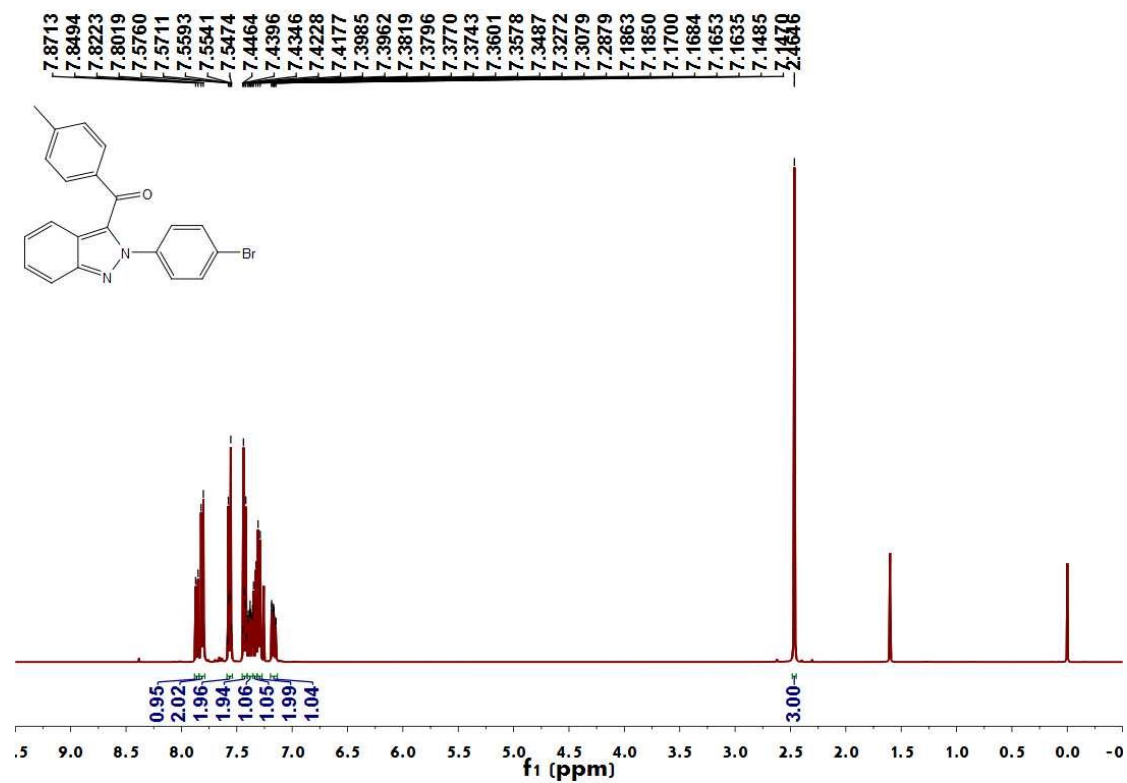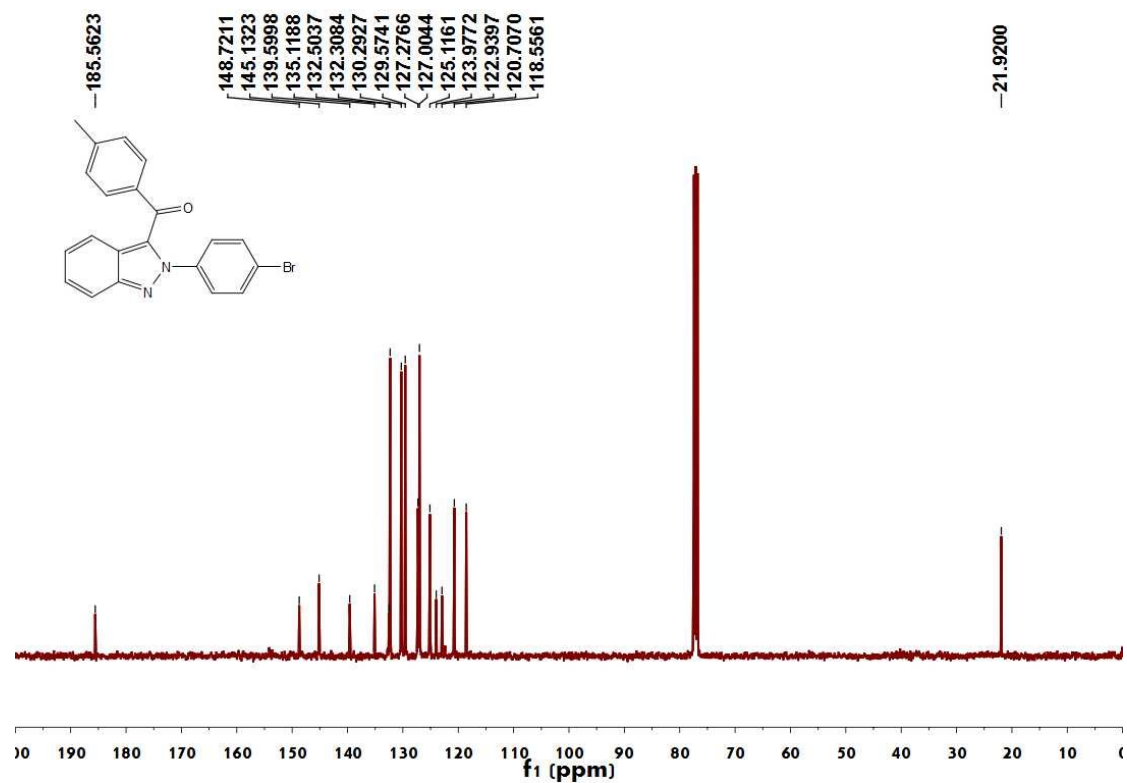

5e

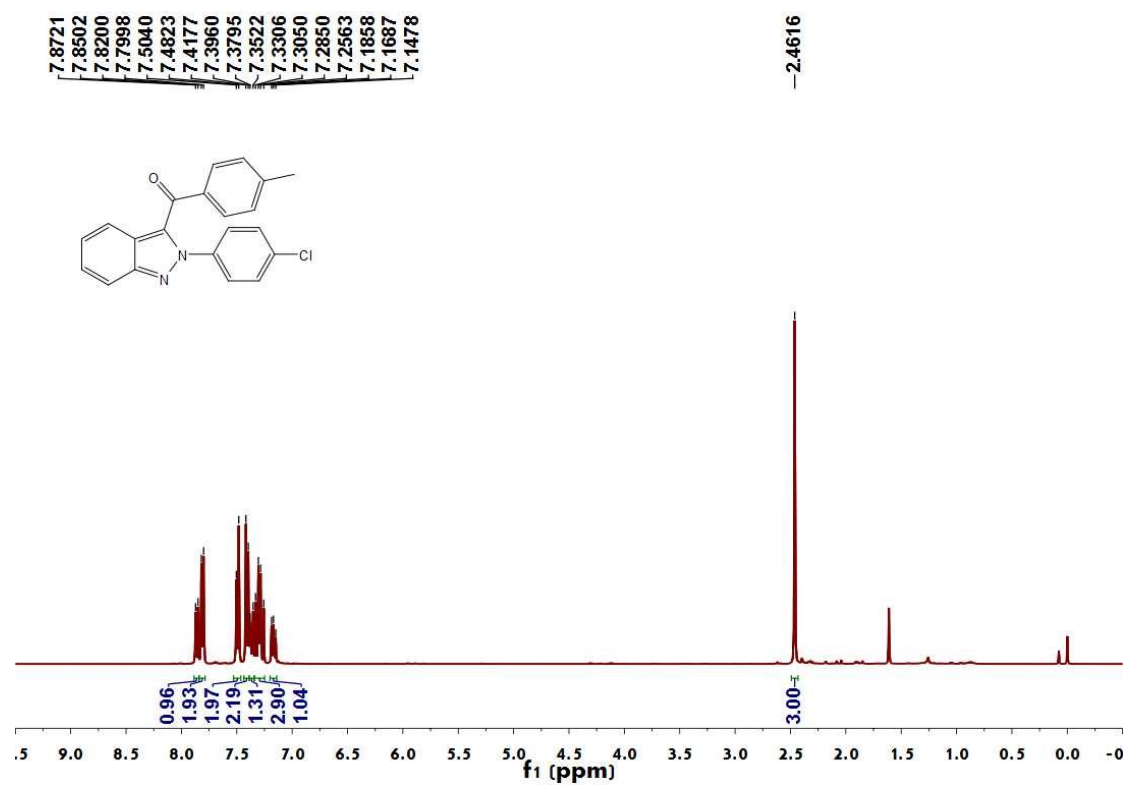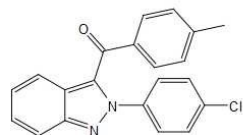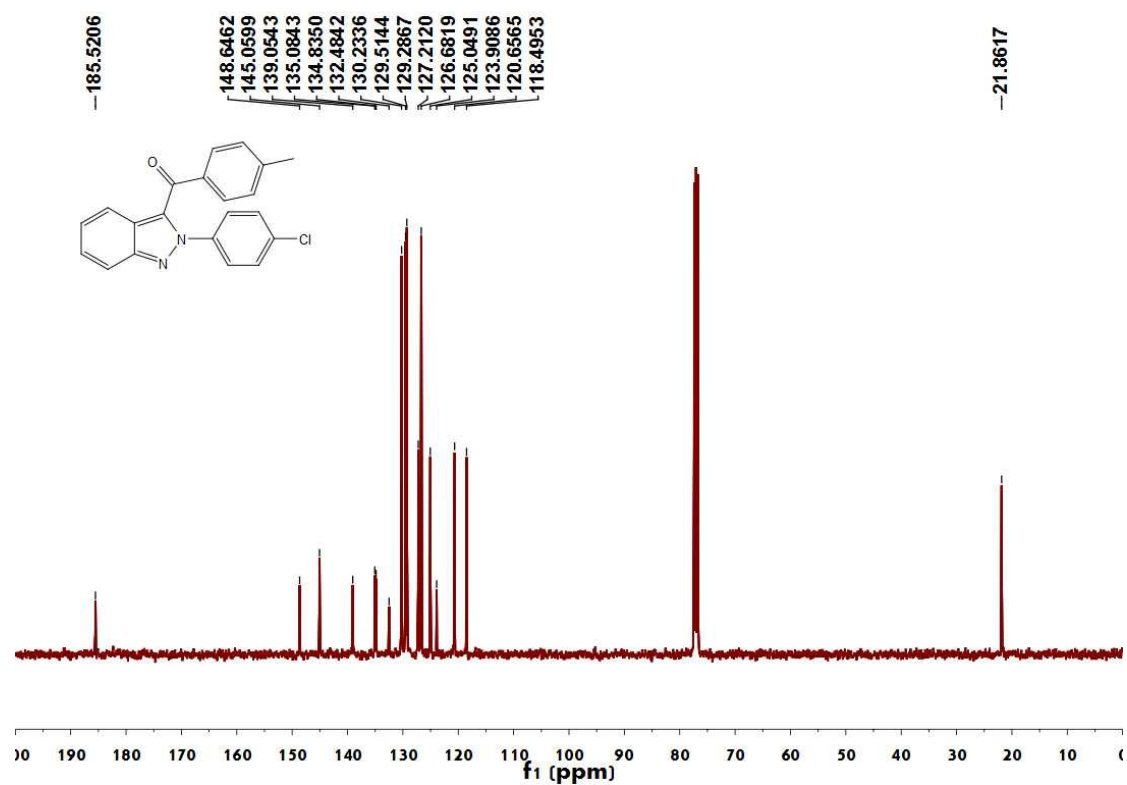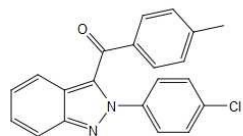

5f

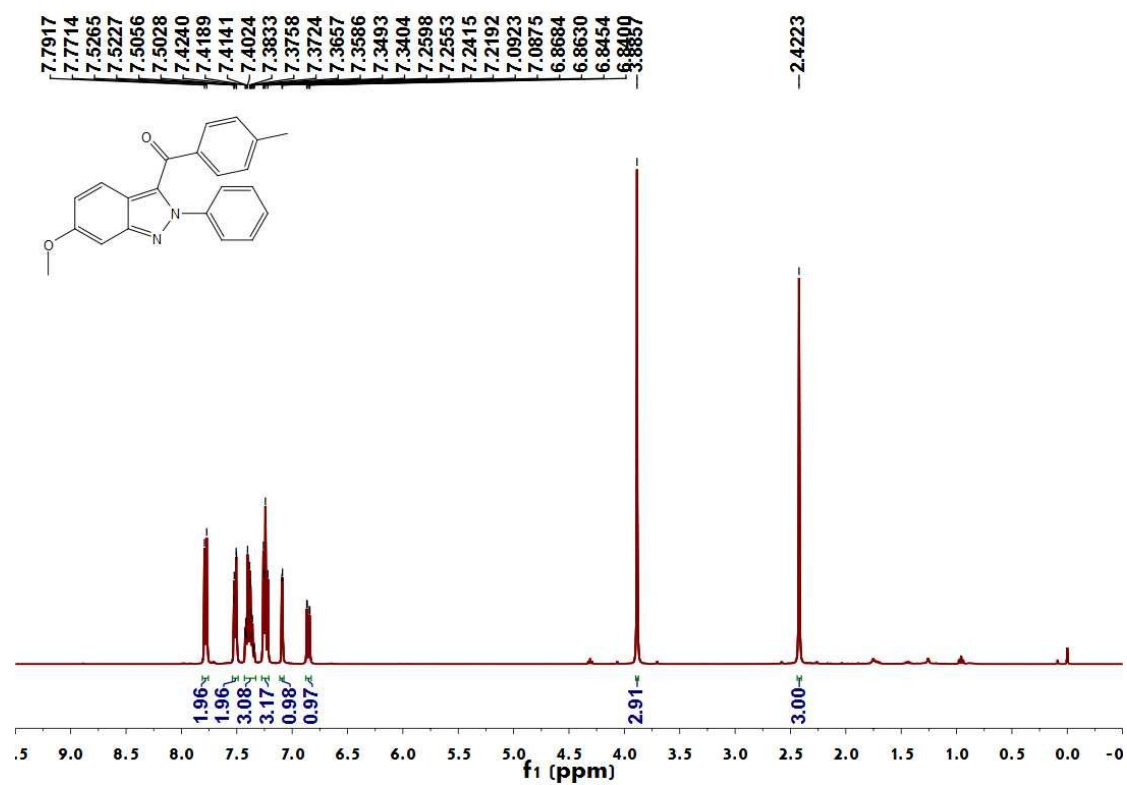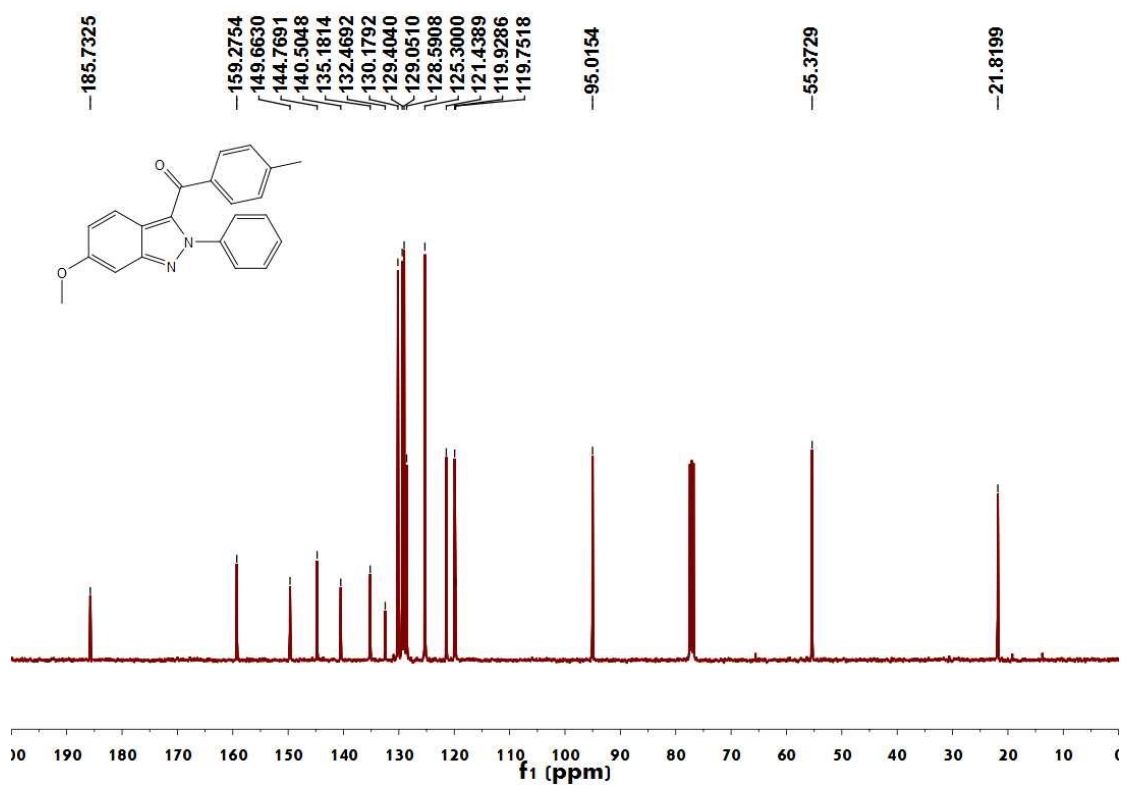

5g

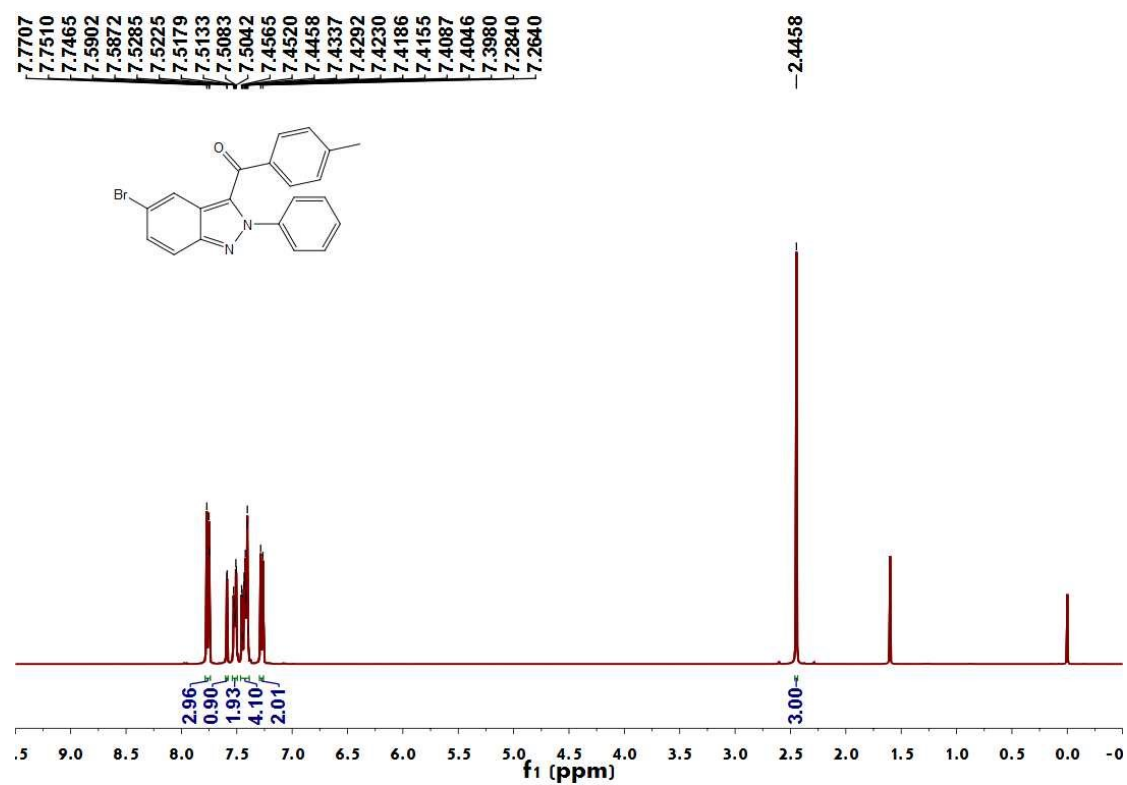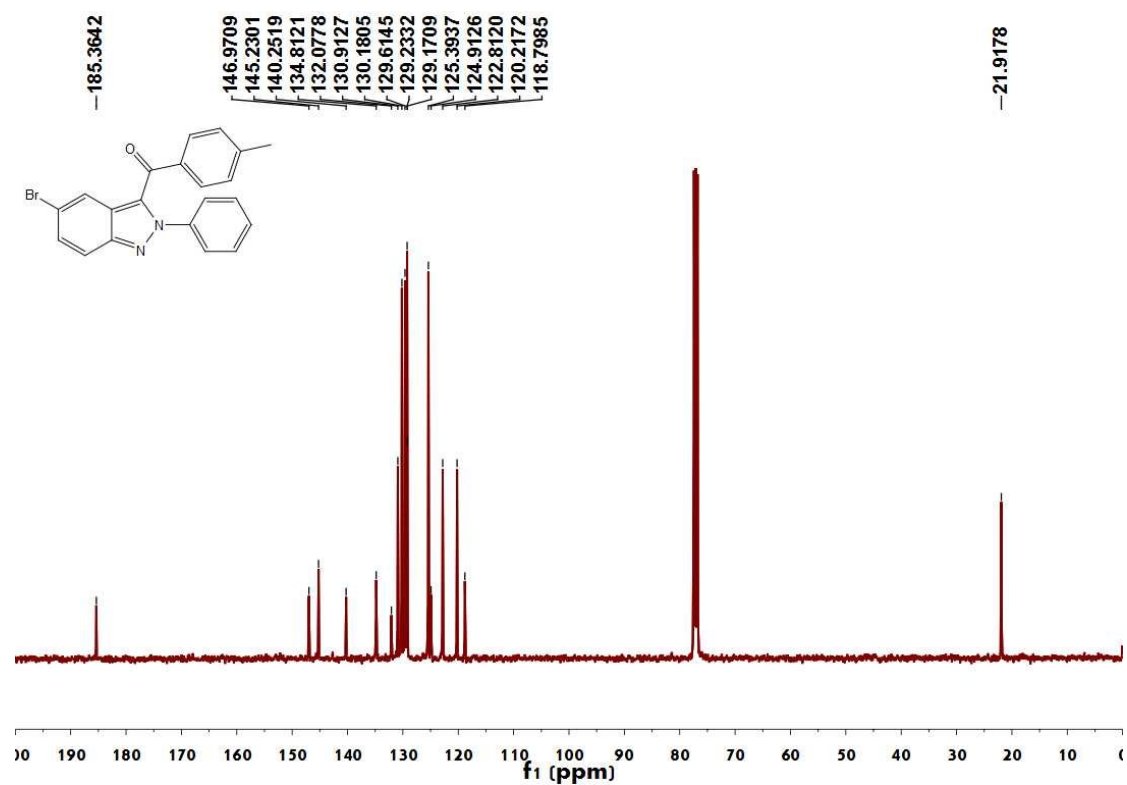

5h

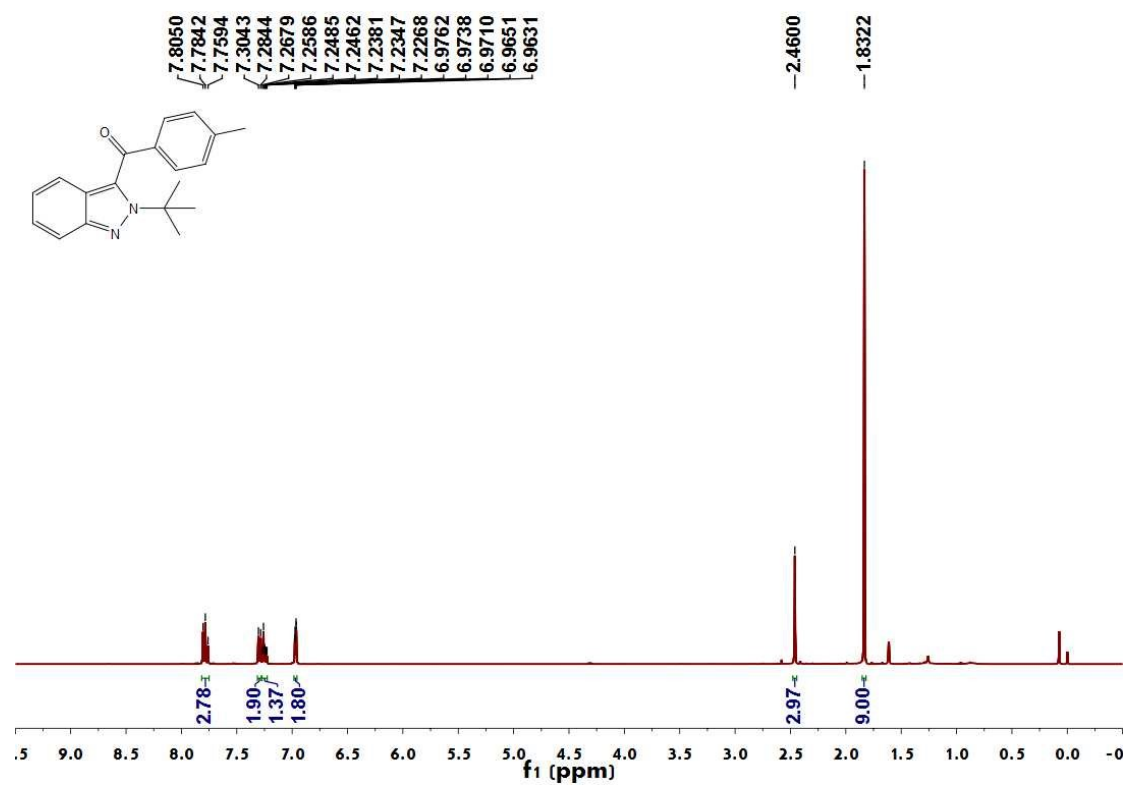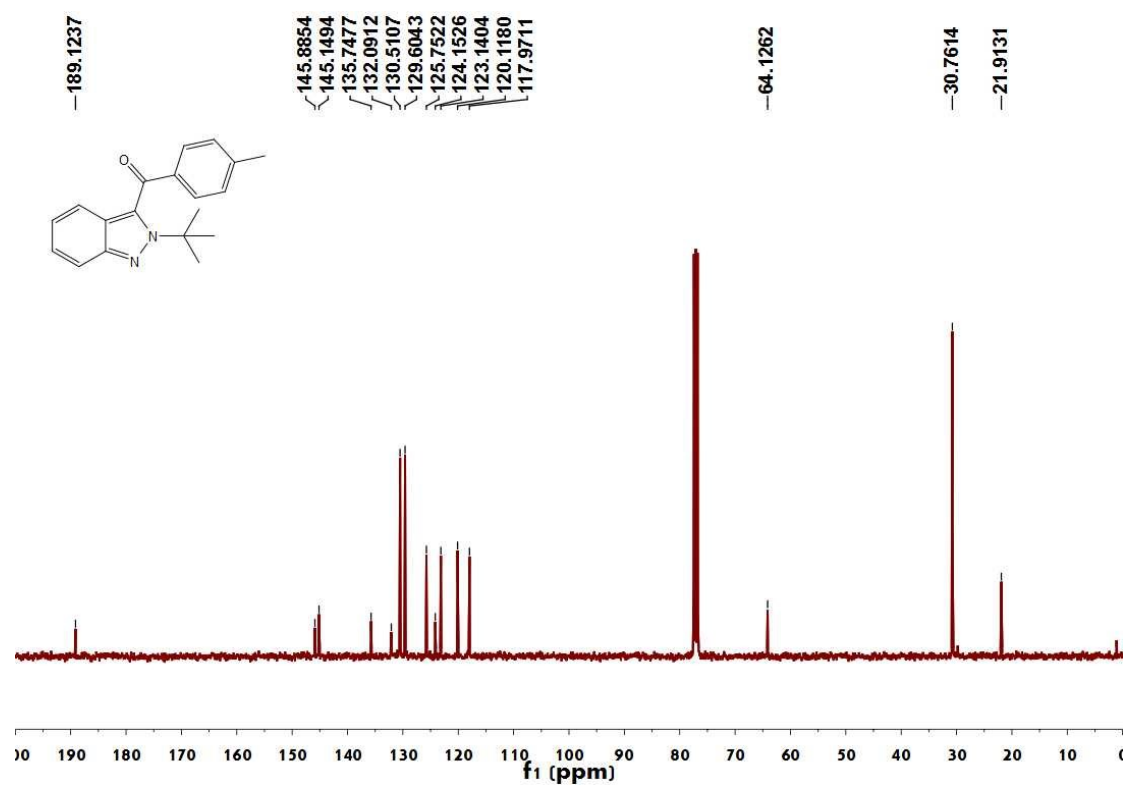



5i

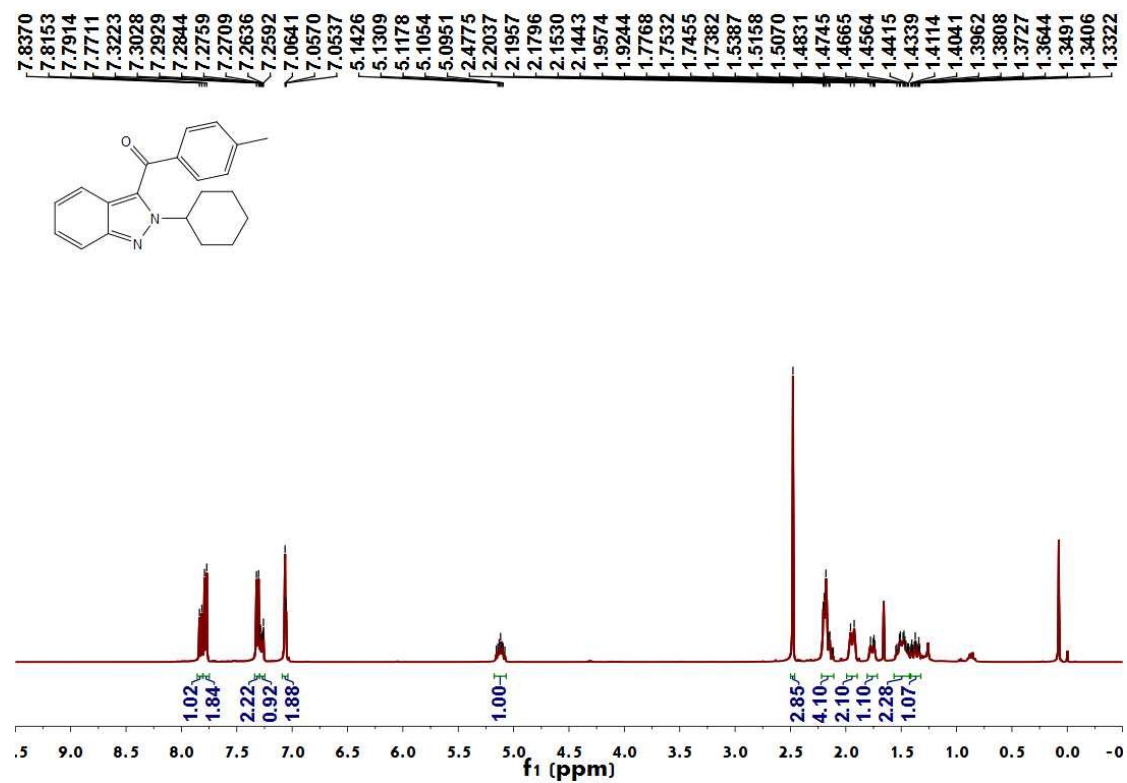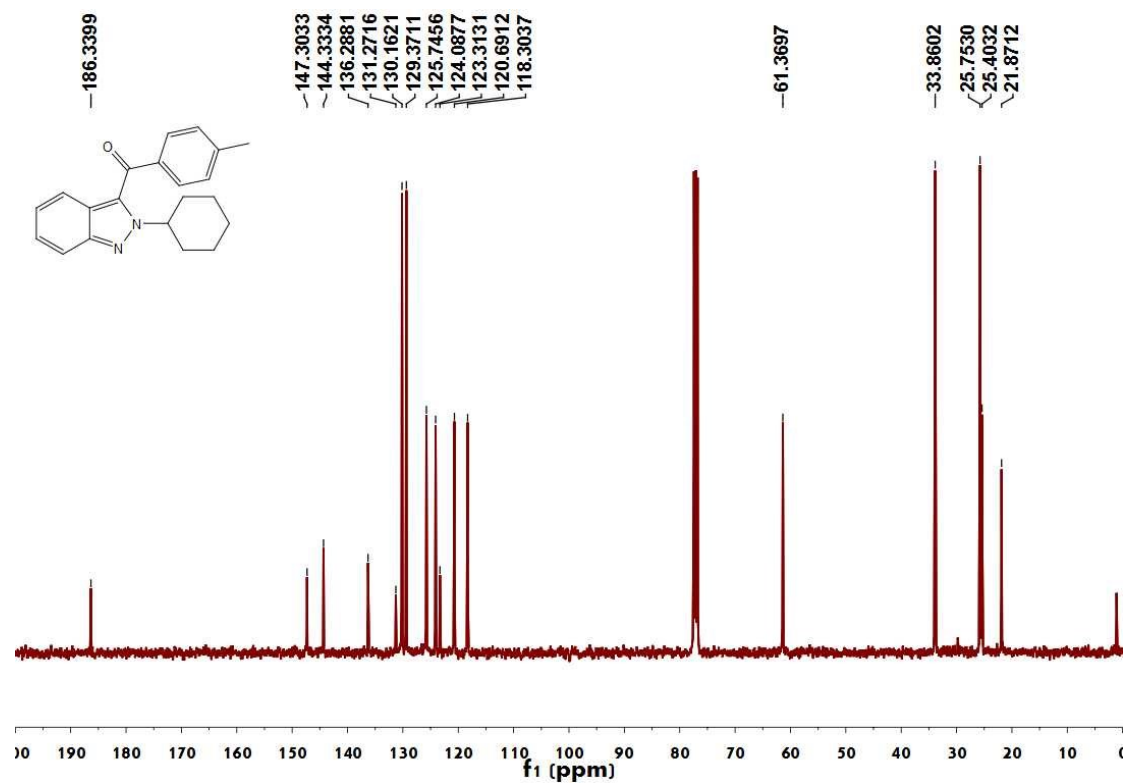

5j

7.9019  
7.8819  
7.8644  
7.8613  
7.6252  
7.6067  
7.5880  
7.5537  
7.5492  
7.5330  
7.5298  
7.4815  
7.4621  
7.4529  
7.4431  
7.4309  
7.4160  
7.4116  
7.3972  
7.3923  
7.3898  
7.3843  
7.3681  
7.3610  
7.2041  
7.1860  
7.1830  
7.1661

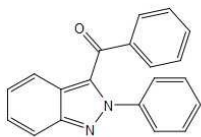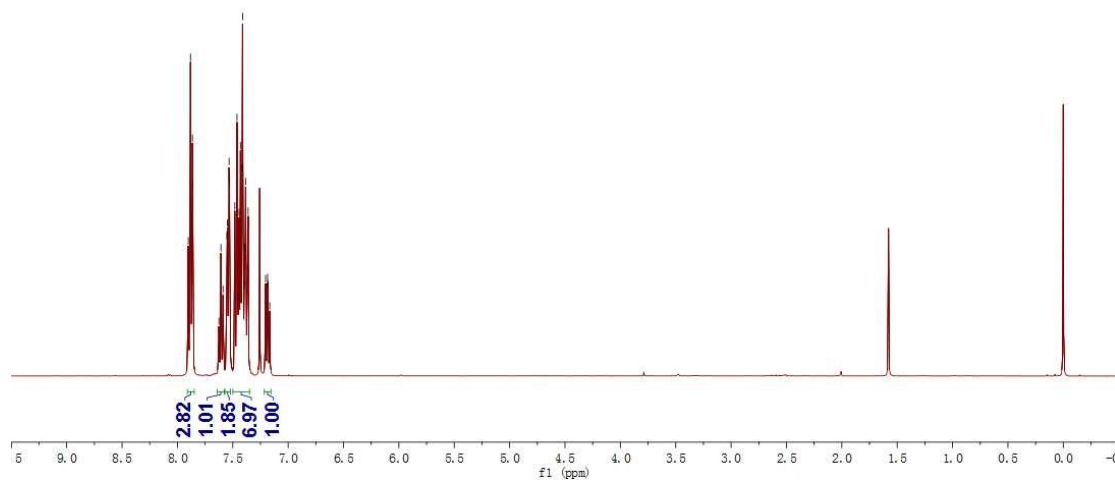

186.0626

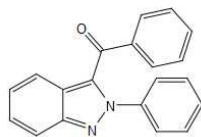

148.6596  
140.5908  
137.9088  
133.6497  
132.3553  
129.9971  
129.1683  
129.0206  
128.7273  
127.1138  
125.6292  
125.1082  
124.1625  
120.6804  
118.6325

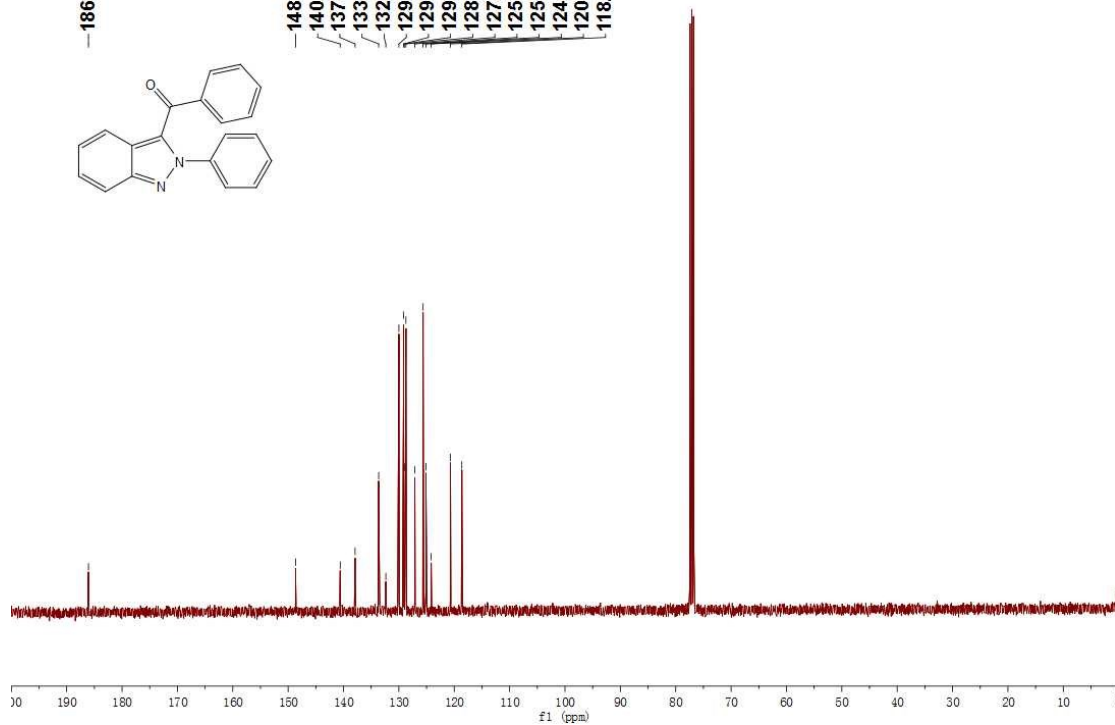

5k

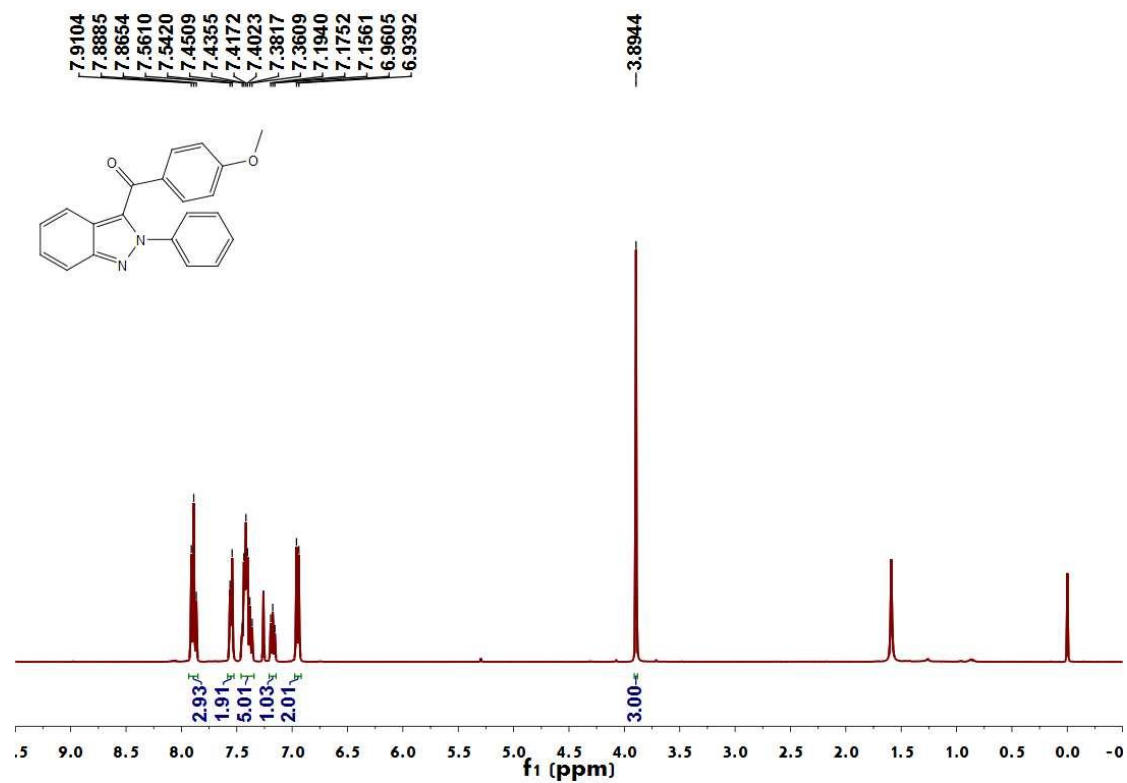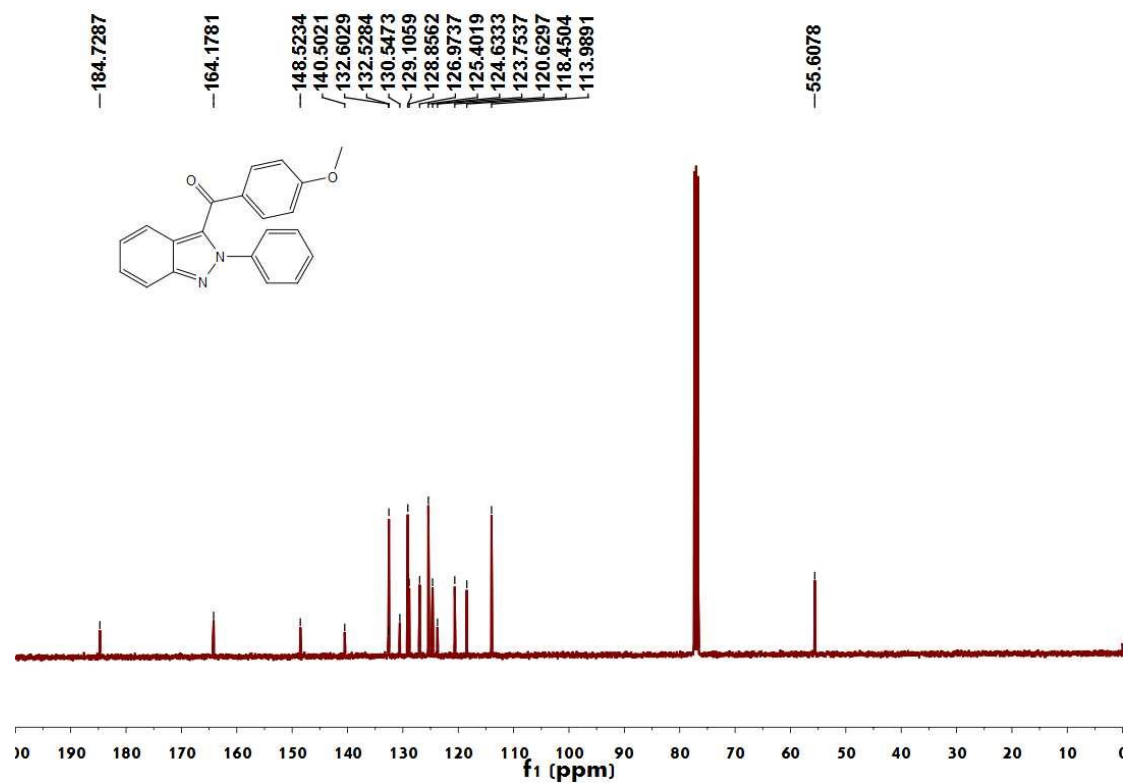

51

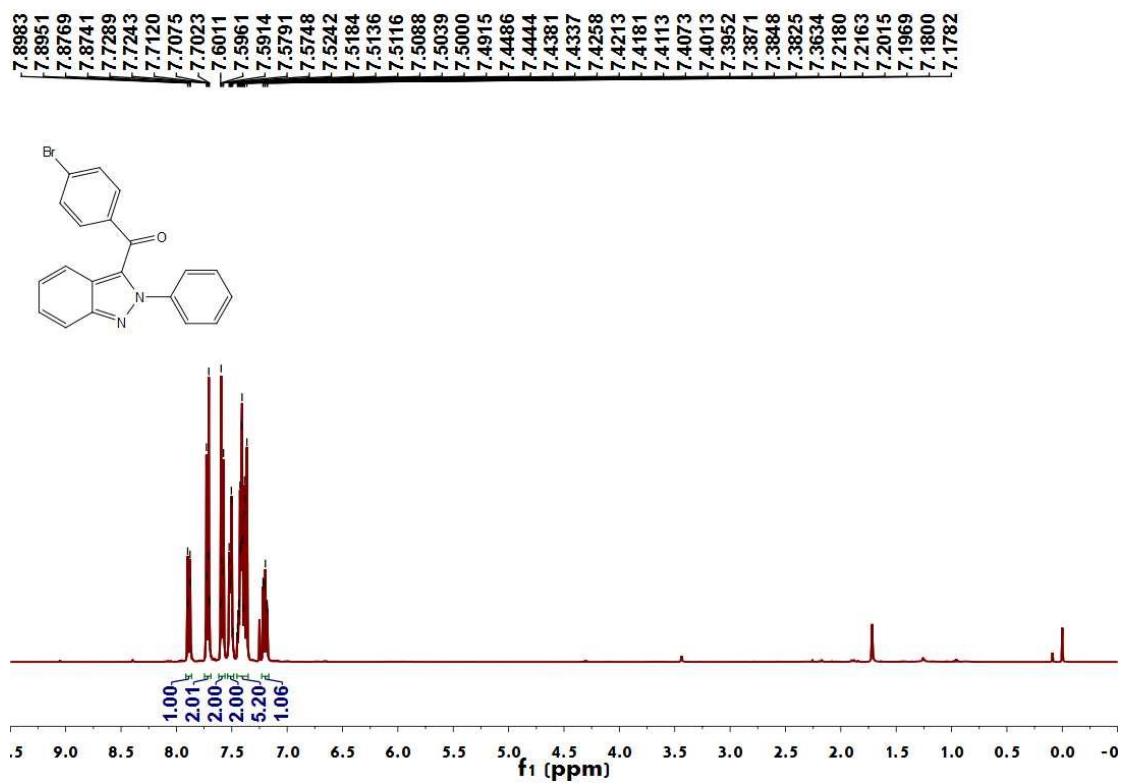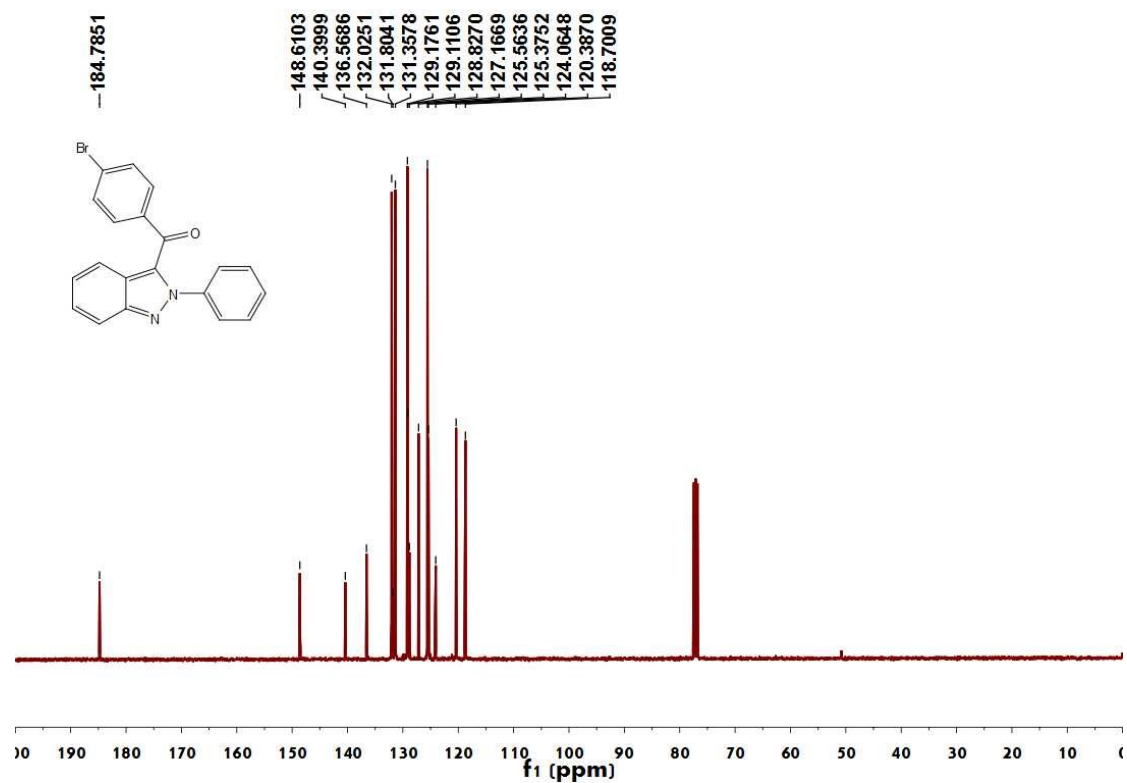

5m

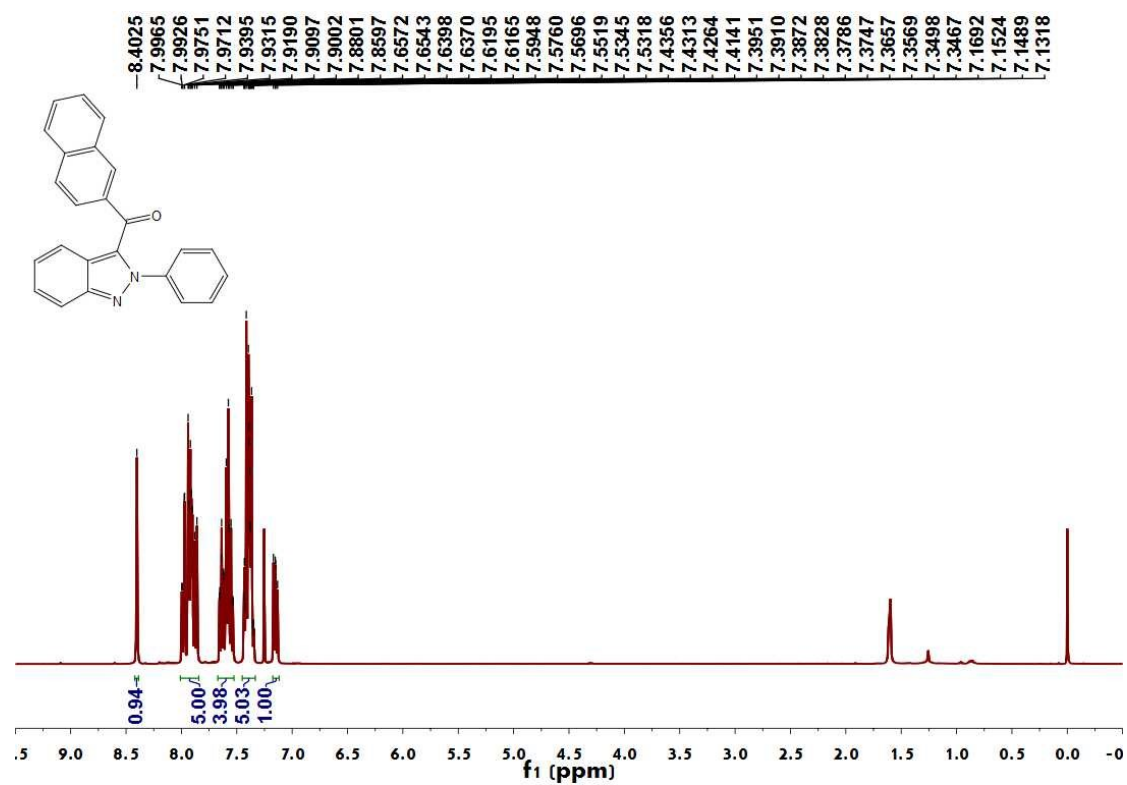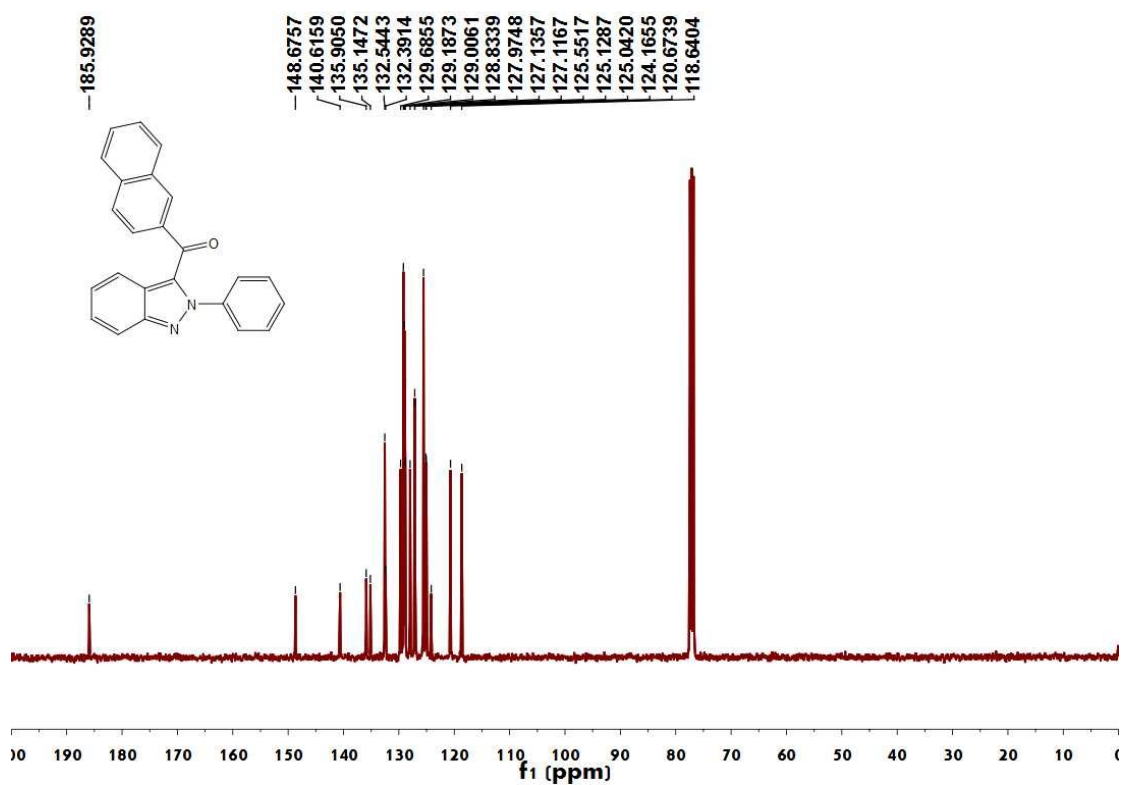

5n

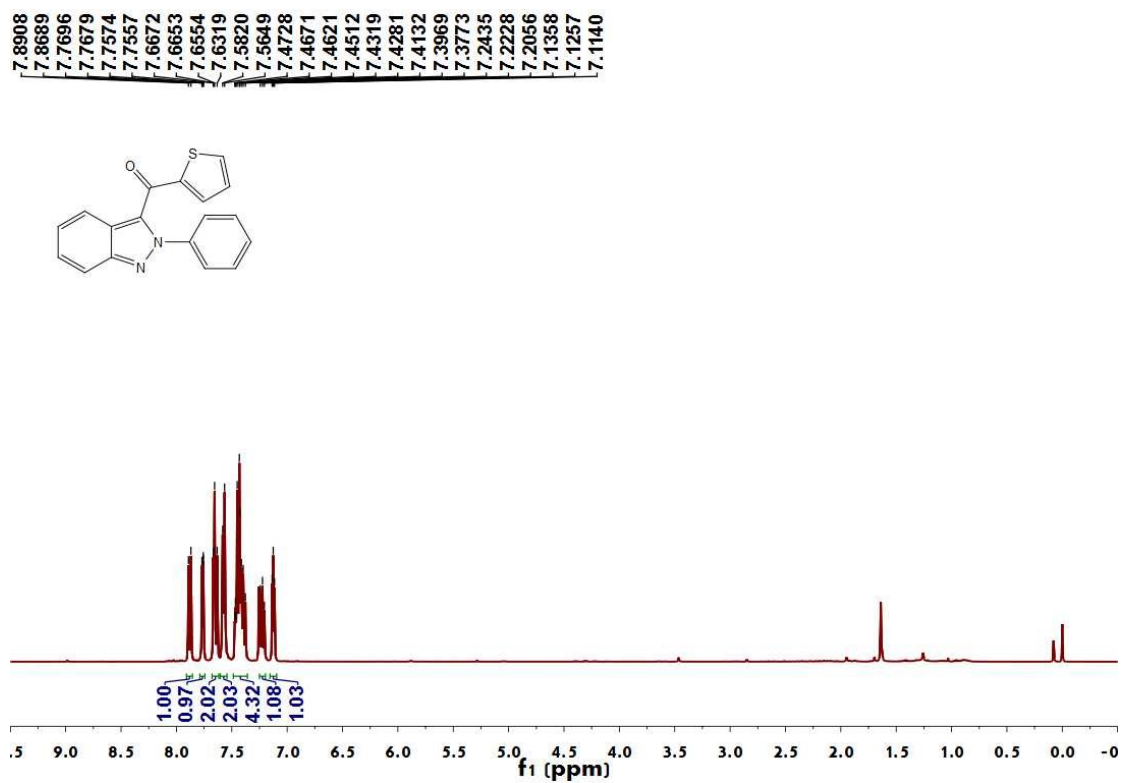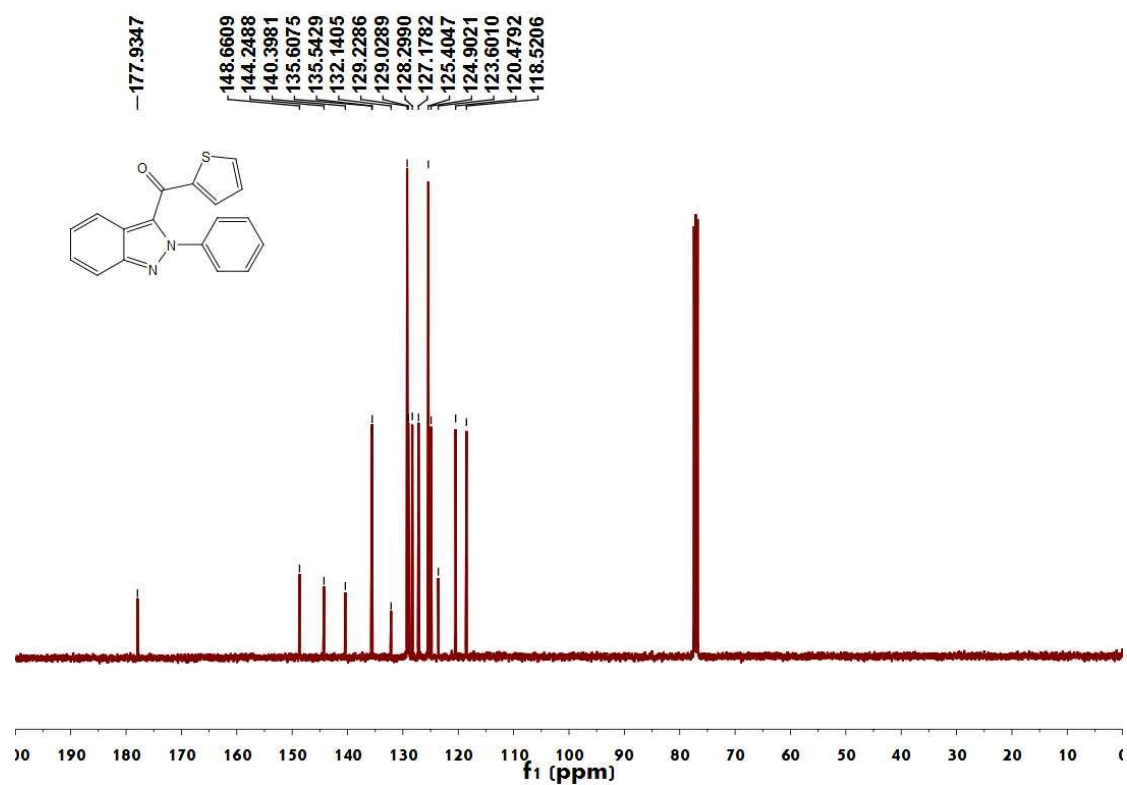

50

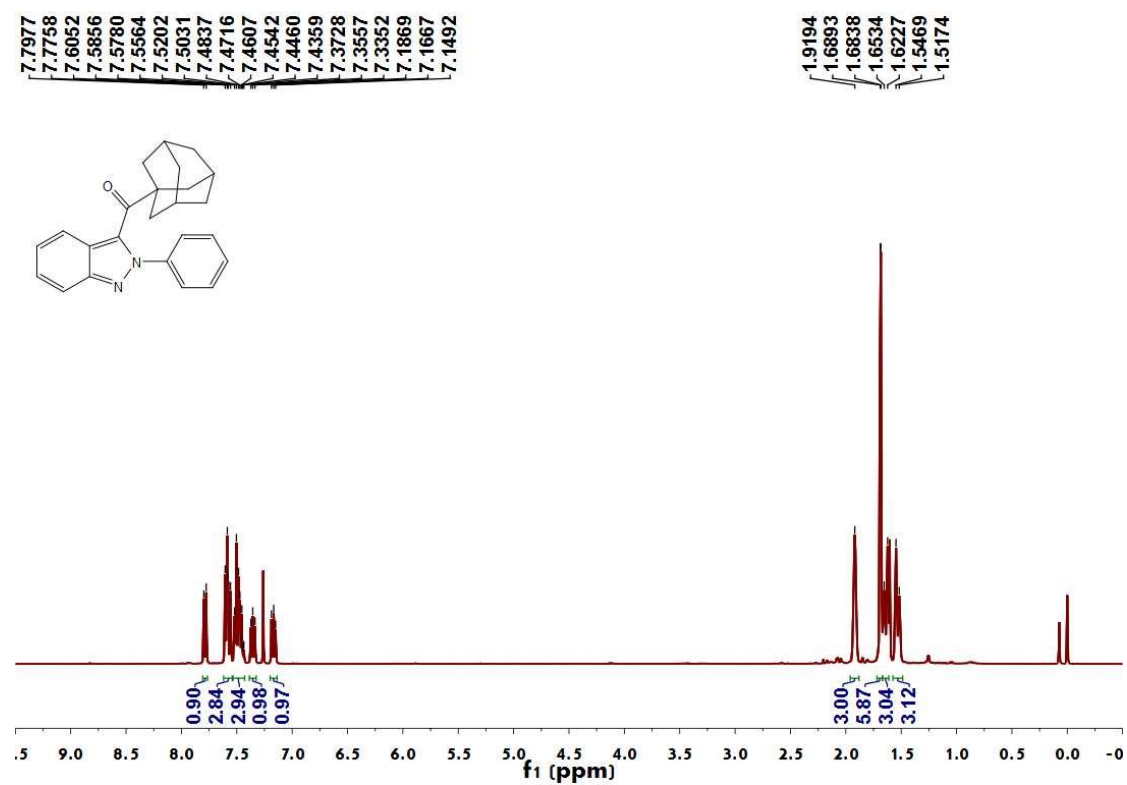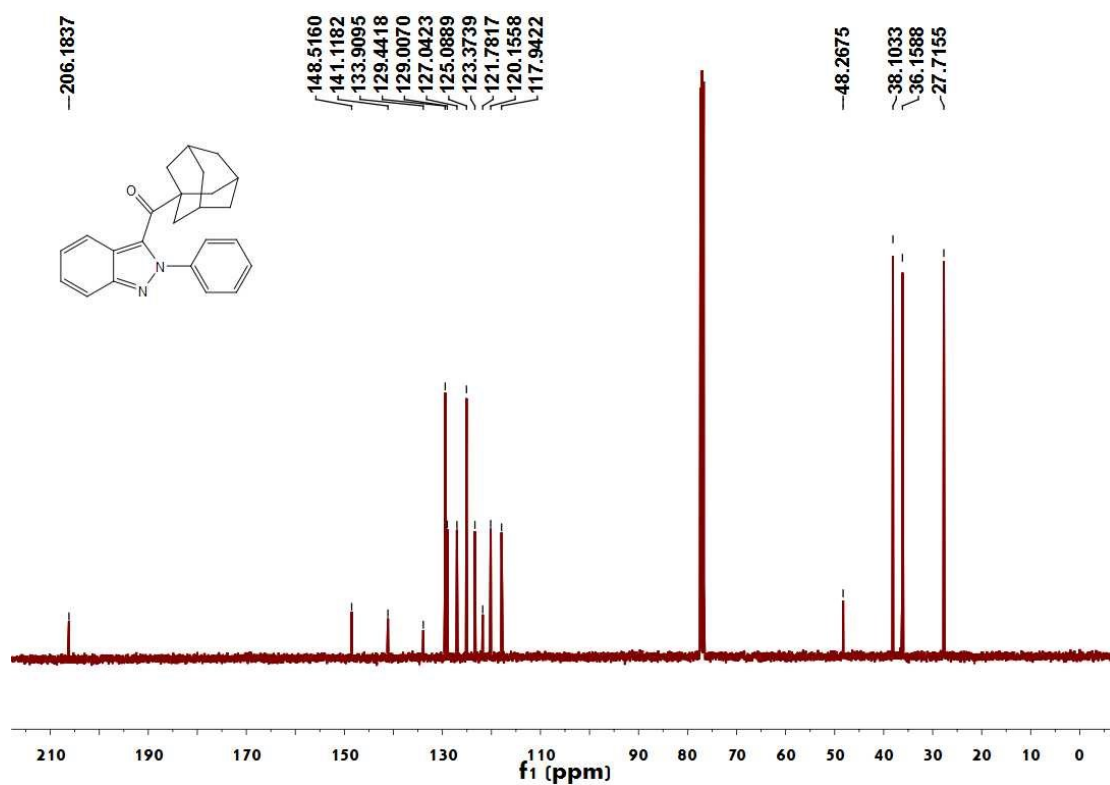

5v

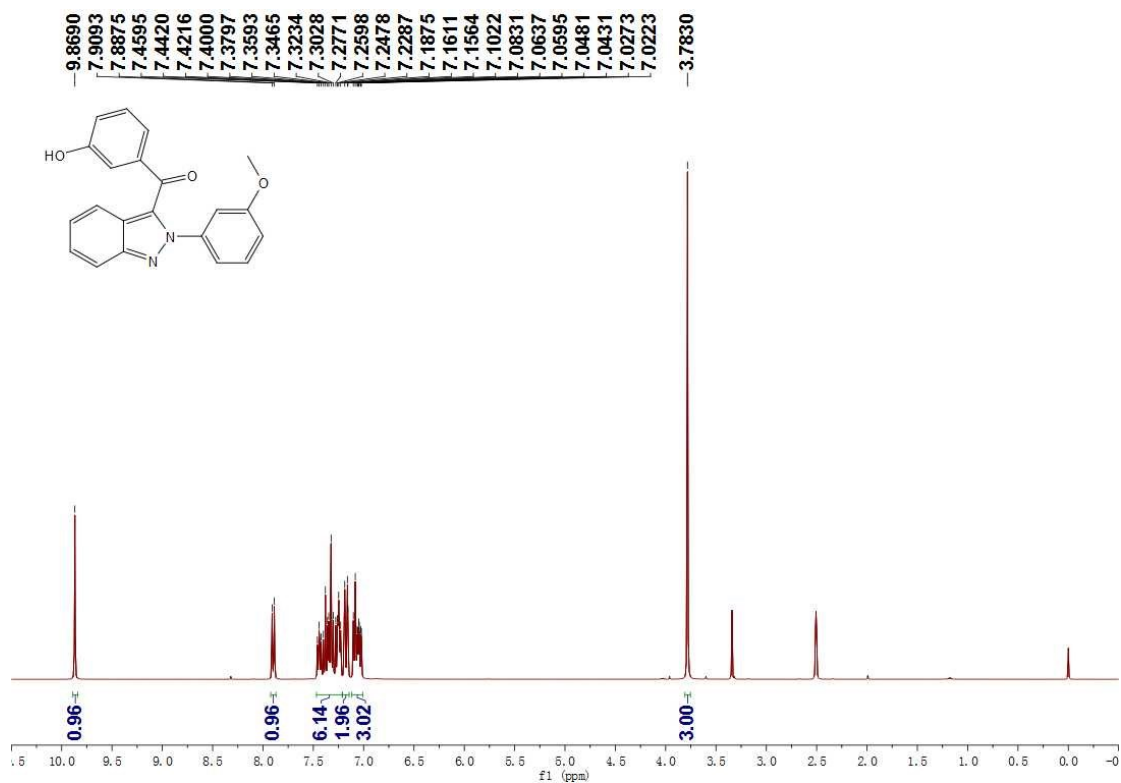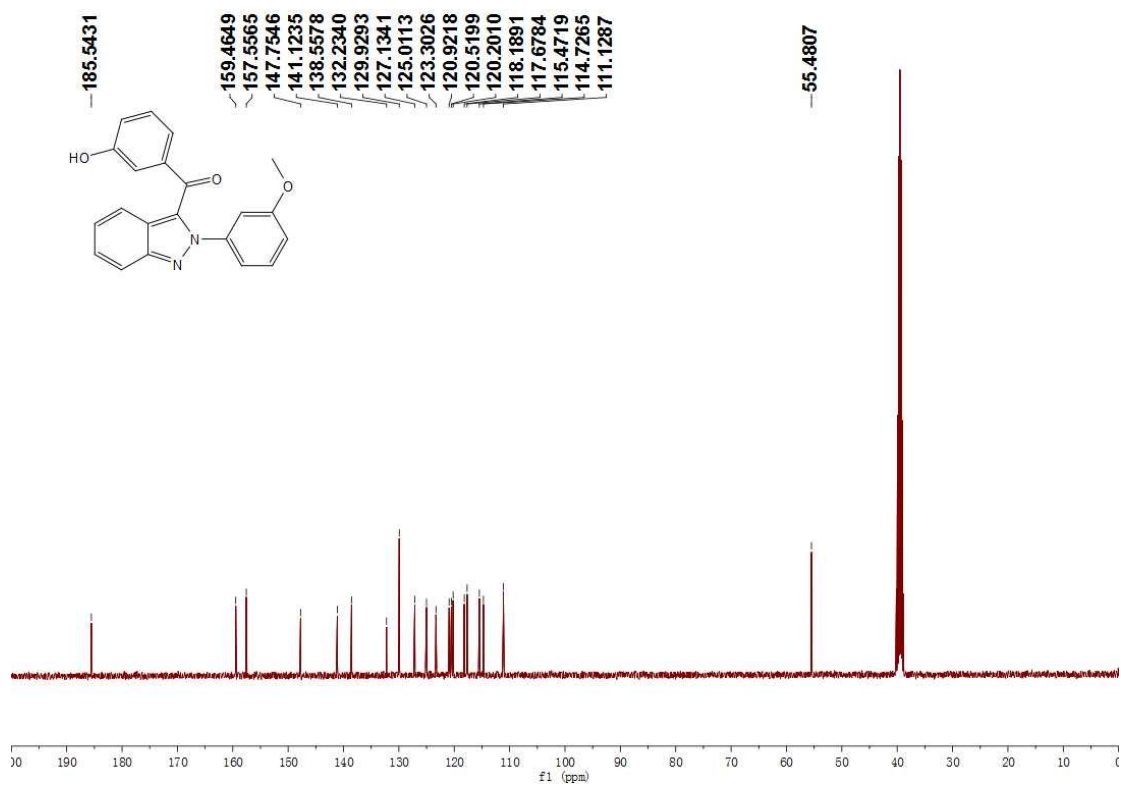



3w

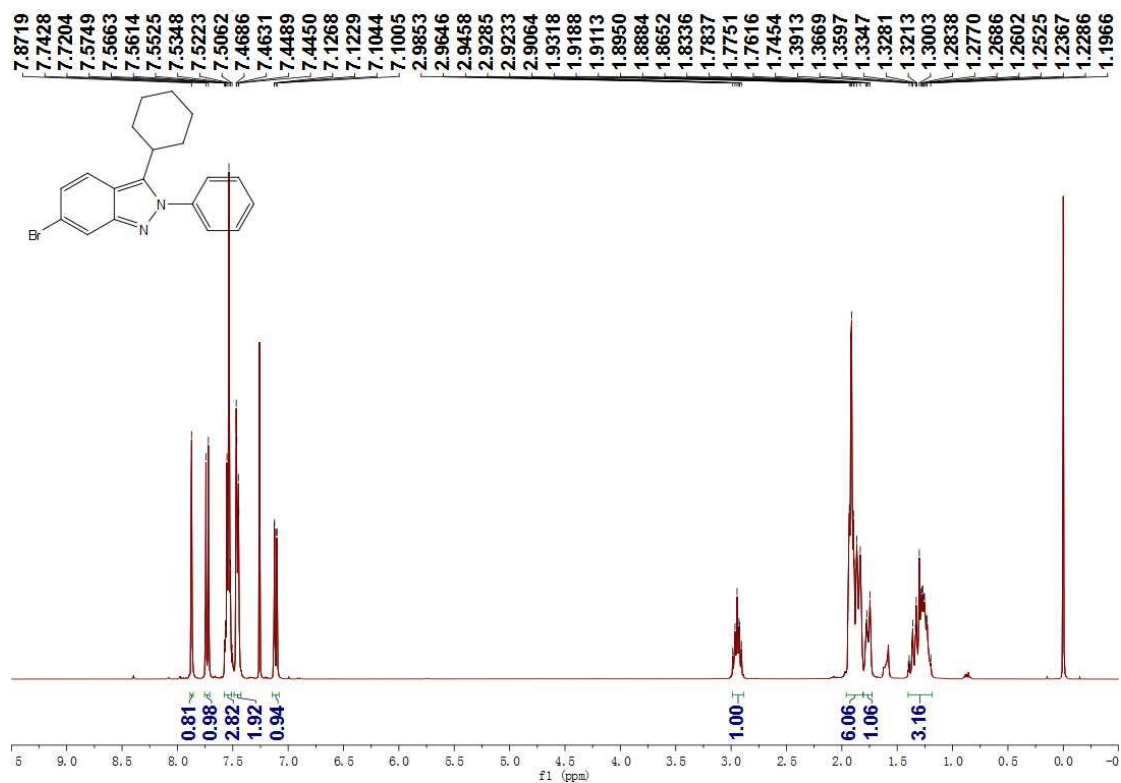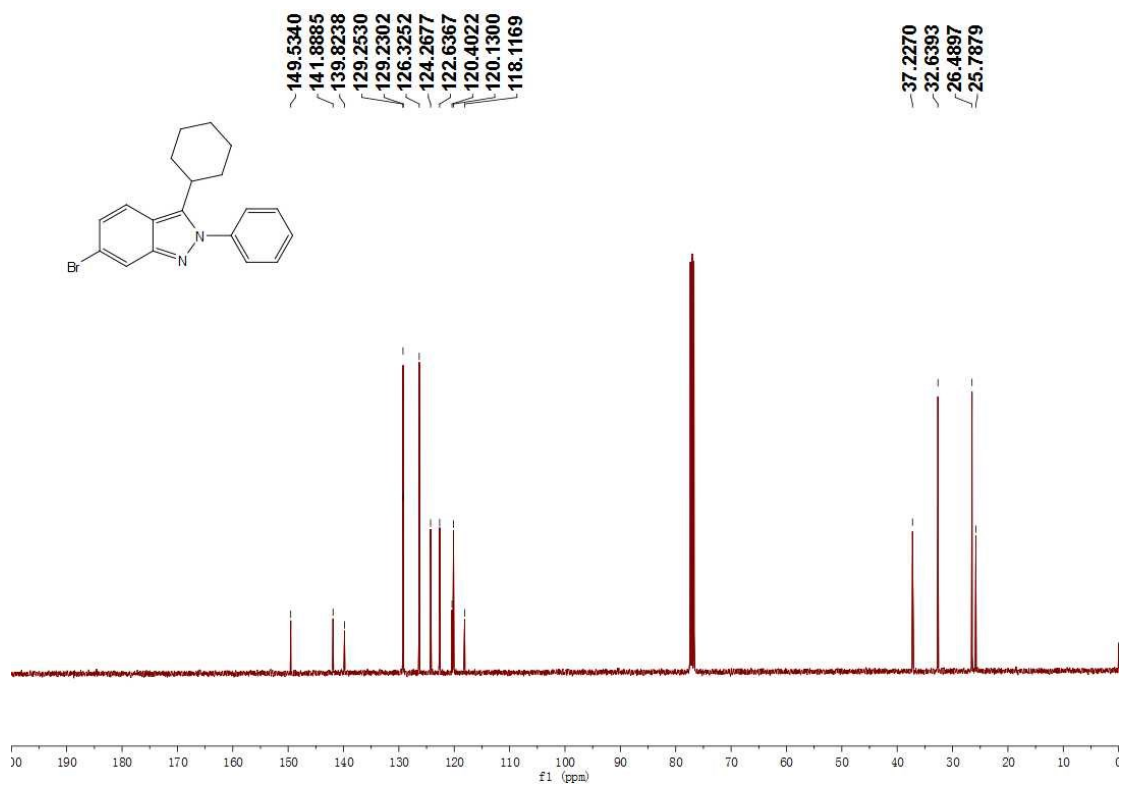

3x

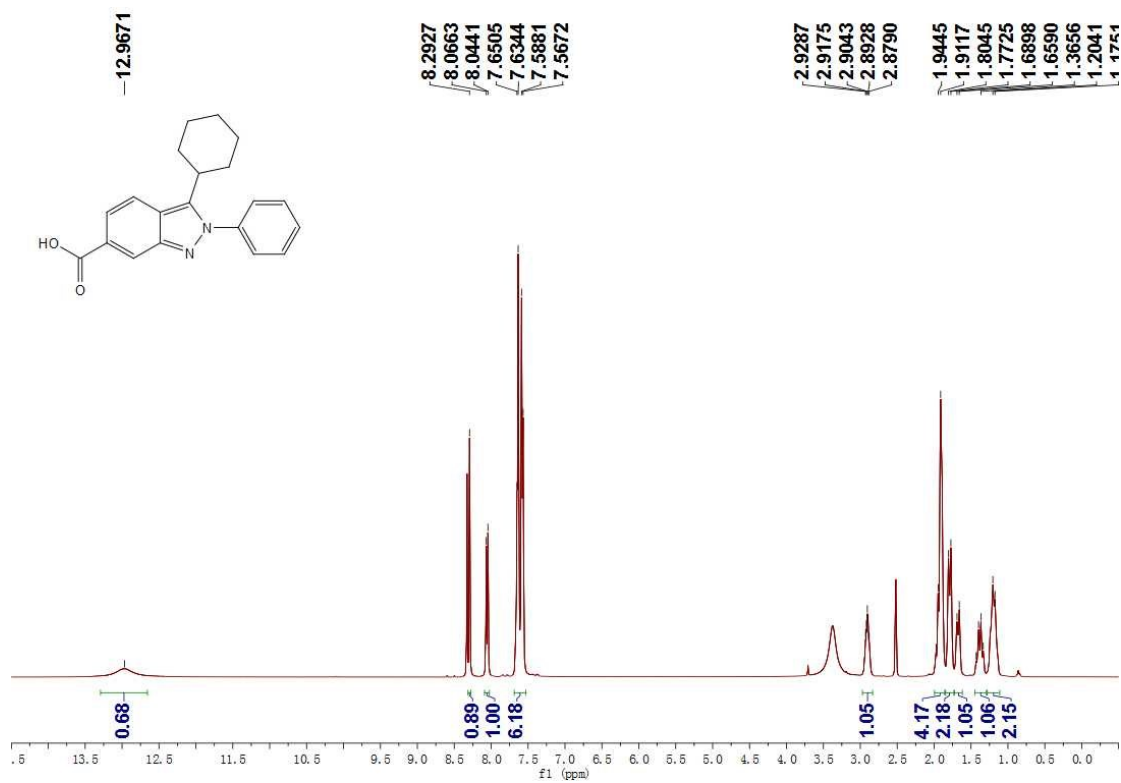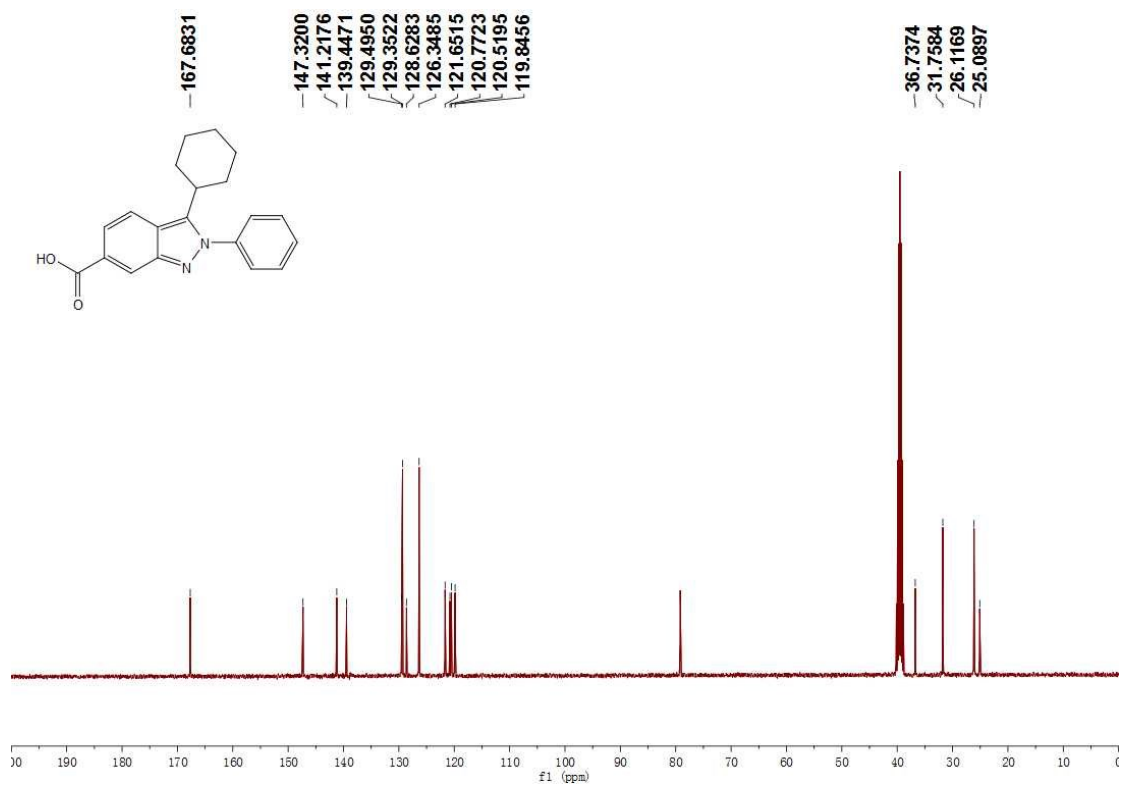

Supplement: d0qo00507j1.pdf [file d0qo00507j1.pdf]
